# Supplementary material for: An In-Silico Analysis of Drugs Potentially Modulating the Cytokine Storm Triggered by SARS-CoV-2 Infection<strong> </strong>
Source: Preprints.org preprint supplement (doi:10.20944/preprints202006.0087.v1), 2020-06-07
Supplement: Supplementary file 1 [file Table S1.xlsx]

## Sheet: Table S1
	TABLE S1. Gene signatures associated to COVID-19 used in this study.
	COVIDCS Signature (Zhou et al. (2020))	CSs Signature (Xiong et al. (2020))	CSs[sc] Signature (Liao et al. (2020))
	IL1RN	CXCL11	S100A9
	IL1B	CXCL2	S100A8
	CXCL17	TGFB2	S100A12
	CXCL8	CCL3L1	VCAN
	CCL2	CXCL6	FCN1
	CXCL1	CCL7	CORO1A
	CCL4	CCL4	SELL
	CXCL10	CCL8	CD14
	CXCL2	SCGB3A1	CFP
	CCL3	TNFSF10	RNASE2
	CCL20	CCL2	SERPINB1
	CXCL6	CXCL1	FPR1
	CCL7	IL33	COTL1
	CXCL11	IL10	MPEG1
	CCL8	IL36G	STAB1
	TNFSF10	TNFSF15	MS4A6A
	TNFSF13B	IL36RN	IL1RN
	OSM	CCL5	CCL7
	CCR1	CXCL8	IFITM2
	CXCR2	NAMPT	IFIT2
	IL5RA		IFIT3
	CXCR1		IER2
	IFNGR2		MX1
	IL1R1		NFKBIA
	OSMR		RSAD2
	IFNAR1		IFIT1
			DUSP6
			HSPA6
			DNAJB1
			HSPA1B
			CCL2
			HSPB1
			HSPH1
			CCL8
			BAG3
			CCL3
			TIMP1
			HSP90AA1
			CCL4
			DEFB1
			VAMP5
			CCL4L2
			CXCL10
			NINJ1
			SOD2
			CCL3L1
			BCL2A1
			TYMP
			SGK1
			ISG15
			CTSB
			ANKRD22
			CALHM6
			GBP5
			GBP1
			ISG20
			APOBEC3A
			IDO1
			TNFSF10
			CLU
			SLC25A37
			PLEK
			GCH1
			CXCL11
			PLA2G7
			SLAMF7
			CYP1B1
