# Supplementary material for: An In-Silico Analysis of Drugs Potentially Modulating the Cytokine Storm Triggered by SARS-CoV-2 Infection<strong> </strong>
Source: Preprints.org preprint supplement (doi:10.20944/preprints202006.0087.v1), 2020-06-07
Supplement: Supplementary file 2 [file Table S10.xlsx]

## Sheet: Table S10
	Table S10. DREIMT similarity scores for specific compounds with signatures opposite to the indicated immune-related signatures (similarity score <-95).
	Compound	Signature summary	Score
	phensuximide	phensuximide inhibits Macrophage stimulated with IL10 compared to Macrophage stimulated with IL4	-99.9627
	phensuximide	phensuximide inhibits B cell compared to Dendritic cell	-99.9253
	phensuximide	phensuximide inhibits PBMC compared to PBMC stimulated with TIV Influenza vaccine	-97.377
	phensuximide	phensuximide inhibits Macrophage	-96.2793
	phensuximide	phensuximide inhibits OT1 Thymocyte compared to CD8AA Thymocyte	-96.1471
	phensuximide	phensuximide inhibits T CD4+ naÃ¯ve compared to Dendritic cell	-95.9907
	warfarin	warfarin inhibits Macrophage stimulated with IL6 (400 min) and Knock-out model (SOCS3) compared to Macrophage stimulated with IL6 (100 min) and Knock-out model (SOCS3)	-99.9627
	warfarin	warfarin inhibits Macrophage	-99.9627
	warfarin	warfarin inhibits Liver stimulated with IL6 and Knock-out model (IFNG) compared to Liver stimulated with Knock-out model (IFNG)	-99.9627
	warfarin	warfarin inhibits BCL6 (high) T follicular helper compared to T cell	-99.9253
	warfarin	warfarin inhibits T CD4+ compared to T CD4+	-99.9253
	warfarin	warfarin inhibits Neutrophil compared to Neutrophil stimulated with A.phagocytophilum	-99.9253
	warfarin	warfarin inhibits Neutrophil stimulated with IFNg and GM-CSF compared to Neutrophil	-99.8827
	warfarin	warfarin inhibits Consensus signature compared to Consensus signature	-99.2768
	warfarin	warfarin inhibits T cell gamma/delta compared to T cell gamma/delta	-99.1261
	warfarin	warfarin inhibits Dendritic cell compared to Dendritic cell	-98.9582
	warfarin	warfarin inhibits germinal center B cell compared to Plasma cell	-98.9028
	warfarin	warfarin inhibits T CD8+ naÃ¯ve compared to T CD8+ naÃ¯ve	-98.8687
	warfarin	warfarin inhibits T helper compared to T helper stimulated with IL4, anti-CD3 and anti-CD28	-98.08
	warfarin	warfarin inhibits Dendritic cell stimulated with Gardiquimod (30 min) compared to Dendritic cell stimulated with Gardiquimod (12 hours)	-98.0792
	warfarin	warfarin inhibits T CD4+ stimulated with Pioglitazone and Overexpression (PPARG1, FOXP3) compared to T CD4+ stimulated with Pioglitazone and Overexpression (PPARG2, FOXP3)	-97.3303
	warfarin	warfarin inhibits B cell stimulated with CD40L, IL4, IL5, IL2 and Knock-out model (IRF4) compared to B cell stimulated with CD40L, IL4, IL5 and IL2	-96.4574
	warfarin	warfarin inhibits T helper stimulated with IL4, anti-CD3 and anti-CD28 compared to T helper stimulated with IL12, anti-CD3 and anti-CD28	-96.4531
	warfarin	warfarin inhibits B cell stimulated with IL4, IL5, IL2 and Knock-out model (IRF4) compared to B cell stimulated with Knock-out model (IRF4)	-96.321
	warfarin	warfarin inhibits Macrophage compared to Macrophage stimulated with LPS	-96.1325
	warfarin	warfarin inhibits Neutrophil stimulated with CSF2 compared to Neutrophil	-95.9561
	warfarin	warfarin inhibits T regulatory in Colorectal cancer compared to T regulatory	-95.6003
	warfarin	warfarin inhibits T helper 1 compared to T helper 1 stimulated with Knock-out model (EGR2)	-95.4753
	treprostinil	treprostinil inhibits T regulatory	-99.9627
	treprostinil	treprostinil inhibits Splenocyte stimulated with MuLV compared to Splenocyte stimulated with Sendai virus	-99.9253
	treprostinil	treprostinil inhibits Thymus in perdimedullae compared to Thymus in subcapsular	-98.4577
	treprostinil	treprostinil inhibits Macrophage	-98.2433
	ZM-323881	ZM-323881 inhibits PBMC compared to PBMC in Diabetes	-99.9627
	ZM-323881	ZM-323881 inhibits thymic T cell compared to thymic CD24 (low) T cell	-99.9253
	bupropion	bupropion inhibits Macrophage	-99.9627
	bupropion	bupropion inhibits T helper stimulated with IL4, TGFB, anti-CD3 and anti-CD28 compared to T helper stimulated with IL12, TGFB, anti-CD3 and anti-CD28	-99.9253
	TPCA-1	TPCA-1 inhibits T CD8+ effector compared to T CD8+ effector	-99.9627
	TPCA-1	TPCA-1 inhibits Macrophage stimulated with M.bovis compared to Macrophage stimulated with M.bovis and Knock-out model (MYD88)	-99.9253
	TPCA-1	TPCA-1 inhibits T helper stimulated with IL12, anti-CD3 and anti-CD28 compared to T CD4+ naÃ¯ve	-99.4729
	TPCA-1	TPCA-1 inhibits T CD4+ stimulated with cultured (24 hours) compared to T CD4+ stimulated with cultured (0 hours)	-99.1589
	TPCA-1	TPCA-1 inhibits T cell gamma/delta compared to T cell gamma/delta	-98.9794
	TPCA-1	TPCA-1 inhibits Dendritic cell stimulated with R848 (2 hours) compared to Dendritic cell stimulated with R848 (8 hours)	-97.9886
	TPCA-1	TPCA-1 inhibits NK cell compared to alphabeta T CD8+	-97.947
	TPCA-1	TPCA-1 inhibits spleen Macrophage compared to TAM Macrophage in Glioblastoma	-97.7918
	TPCA-1	TPCA-1 inhibits T CD8+ effector compared to T CD8+ effector	-96.7421
	TPCA-1	TPCA-1 inhibits T CD4+ stimulated with Knock-out model (NRAS) compared to T CD4+	-95.6956
	TPCA-1	TPCA-1 inhibits DP Thymocyte stimulated with anti-CD3 compared to DP Thymocyte	-95.1131
	TPCA-1	TPCA-1 inhibits T CD4+ naÃ¯ve compared to T helper 17 stimulated with IL23A, IL1B and IL16	-95.0802
	tipifarnib	tipifarnib inhibits Macrophage	-99.9627
	tipifarnib	tipifarnib inhibits PBMC in Lupus erythematosus compared to PBMC	-99.9253
	tipifarnib	tipifarnib inhibits T regulatory compared to peripheral lymph T cell	-98.4165
	tipifarnib	tipifarnib inhibits T regulatory stimulated with Knock-out model (ADORA2A) compared to T regulatory stimulated with A2A antagonist [ZM241385]	-96.5152
	tipifarnib	tipifarnib inhibits DP Thymocyte stimulated with Knock-out model (ELK1) compared to DP Thymocyte stimulated with anti-CD3 and Knock-out model (ELK1)	-95.8437
	tipifarnib	tipifarnib inhibits Other in Lupus erythematosus compared to Other	-95.5752
	triacsin-c	triacsin-c inhibits pre-theraphy responders Melanoma stimulated with anti-PD1 in Melanoma compared to pre-therapy non-responders Melanoma stimulated with anti-PD1 in Melanoma	-99.9627
	triacsin-c	triacsin-c inhibits T CD4+ compared to T CD4+	-99.9253
	triacsin-c	triacsin-c inhibits T CD8+ naÃ¯ve compared to Dendritic cell	-99.3004
	triacsin-c	triacsin-c inhibits T CD4+ naÃ¯ve compared to Dendritic cell	-98.0013
	triacsin-c	triacsin-c inhibits Dendritic cell stimulated with Gardiquimod (30 min) compared to Dendritic cell stimulated with Gardiquimod (24 hours)	-96.3255
	mepyramine	mepyramine inhibits Macrophage stimulated with Knock-out model (MLL4) compared to Macrophage stimulated with LPS and Knock-out model (MLL4)	-99.9627
	mepyramine	mepyramine inhibits T CD8+ effector stimulated with LCMV compared to T CD8+ effector stimulated with LCMV	-99.9253
	mepyramine	mepyramine inhibits Macrophage M1	-95.4469
	mepyramine	mepyramine inhibits B cell compared to B cell stimulated with anti-IgM	-95.315
	methoxsalen	methoxsalen inhibits Macrophage stimulated with IL4 compared to Macrophage stimulated with IL10	-99.9627
	methoxsalen	methoxsalen inhibits Monocyte stimulated with anti-TREM1 and LPS compared to Monocyte stimulated with IgG	-99.9253
	niacin	niacin inhibits responder Melanoma stimulated with anti-PD1 in Melanoma compared to non-responder Melanoma stimulated with anti-PD1 in Melanoma	-99.9627
	niacin	niacin inhibits Other compared to Other in SjÃ¶gren syndrome	-99.9627
	niacin	niacin inhibits T cell gamma/delta compared to T cell gamma/delta	-99.9627
	niacin	niacin inhibits spleen Macrophage compared to TAM Macrophage in Colorectal adenocarcinoma	-99.9253
	niacin	niacin inhibits Dendritic cell stimulated with R848 compared to Dendritic cell stimulated with LPS	-99.9253
	niacin	niacin inhibits Dendritic cell stimulated with LPS compared to Dendritic cell stimulated with R848 and LPS	-99.9253
	niacin	niacin inhibits T cell gamma/delta compared to T cell gamma/delta	-99.5969
	ketanserin	ketanserin inhibits Consensus signature	-99.9627
	ketanserin	ketanserin inhibits T CD8+ effector stimulated with LCMV compared to T CD8+ effector stimulated with LCMV	-99.9253
	ketanserin	ketanserin inhibits Neutrophil compared to Neutrophil	-99.3226
	verapamil	verapamil inhibits B cell stimulated with PL2-3 compared to B cell stimulated with CpG	-99.9627
	verapamil	verapamil inhibits T CD4+ na├»ve compared to T helper stimulated with IL4, TGFB, anti-CD3 and anti-CD28	-99.9253
	verapamil	verapamil inhibits T CD8+ na├»ve compared to T CD8+ memory	-97.7781
	verapamil	verapamil inhibits multipotent Hematopoietic stem and progenitor cells compared to granulocyte Hematopoietic stem and progenitor cells	-96.3067
	verapamil	verapamil inhibits PBMC compared to PBMC stimulated with TIV Influenza vaccine	-96.1077
