# Supplementary material for: An In-Silico Analysis of Drugs Potentially Modulating the Cytokine Storm Triggered by SARS-CoV-2 Infection<strong> </strong>
Source: Preprints.org preprint supplement (doi:10.20944/preprints202006.0087.v1), 2020-06-07
Supplement: Supplementary file 3 [file Table S11.xlsx]

## Sheet: COVID-19 signatures
	TABLE S1. Gene signatures associated to COVID-19 used in this study.
	COVIDCS Signature (Zhou et al. (2020))	CSs Signature (Xiong et al. (2020))	CSs[sc] Signature (Liao et al. (2020))
	IL1RN	CXCL11	S100A9
	IL1B	CXCL2	S100A8
	CXCL17	TGFB2	S100A12
	CXCL8	CCL3L1	VCAN
	CCL2	CXCL6	FCN1
	CXCL1	CCL7	CORO1A
	CCL4	CCL4	SELL
	CXCL10	CCL8	CD14
	CXCL2	SCGB3A1	CFP
	CCL3	TNFSF10	RNASE2
	CCL20	CCL2	SERPINB1
	CXCL6	CXCL1	FPR1
	CCL7	IL33	COTL1
	CXCL11	IL10	MPEG1
	CCL8	IL36G	STAB1
	TNFSF10	TNFSF15	MS4A6A
	TNFSF13B	IL36RN	IL1RN
	OSM	CCL5	CCL7
	CCR1	CXCL8	IFITM2
	CXCR2	NAMPT	IFIT2
	IL5RA		IFIT3
	CXCR1		IER2
	IFNGR2		MX1
	IL1R1		NFKBIA
	OSMR		RSAD2
	IFNAR1		IFIT1
			DUSP6
			HSPA6
			DNAJB1
			HSPA1B
			CCL2
			HSPB1
			HSPH1
			CCL8
			BAG3
			CCL3
			TIMP1
			HSP90AA1
			CCL4
			DEFB1
			VAMP5
			CCL4L2
			CXCL10
			NINJ1
			SOD2
			CCL3L1
			BCL2A1
			TYMP
			SGK1
			ISG15
			CTSB
			ANKRD22
			CALHM6
			GBP5
			GBP1
			ISG20
			APOBEC3A
			IDO1
			TNFSF10
			CLU
			SLC25A37
			PLEK
			GCH1
			CXCL11
			PLA2G7
			SLAMF7
			CYP1B1

## Sheet: CMap classes + correlation
	TABLE S2. CMap classes with associated transcriptional signatures that mimic the different COVID-19 signatures used in this study (similarity score >95).
	CMAP classes correlating to signature			CMAP classes correlating to signature			CMAP classes correlating to signature
	COVIDCS Signature (Zhou et al. (2020))			CSs Signature (Xiong et al. (2020))			CSs[sc] Signature (Liao et al. (2020))
	Score	CMap class		Score	CMap class		Score	CMap class
	100	NFKB Activation GOF		100	NFKB Activation GOF		100	NFKB Activation GOF
	99.97	PKC activator		99.97	PKC activator		99.95	PKC activator
	99.85	Retinoid receptor agonist		99.95	Lysine acetyltransferases LOF		99.85	HSP inhibitor
	99.55	Heat shock 70kDa proteins LOF		99.81	NKL subclass homeoboxes and pseudogenes LOF		99.6	Nucleoporin LOF
	99.5	IKK inhibitor		99.76	Heat shock 70kDa proteins LOF		99.34	Proteasome inhibitor
	99.24	Topoisomerase inhibitor		99.73	FOS transcription factor family GOF		99.3	Topoisomerase inhibitor
	99.2	ATPase inhibitor		99.47	ATPase inhibitor		99.02	NFkB pathway inhibitor
	99.12	PKC inhibitor		99.27	Minor histocompatibility antigens LOF		99.01	Serine proteases GOF
	98.86	Thromboxane receptor antagonist		99.01	Nucleophosmin inhibitor		98.74	NKL subclass homeoboxes and pseudogenes LOF
	98.78	FLT3 inhibitor		98.96	BMP Signaling LOF		98.44	X linked mental retardation group 2 LOF
	98.65	DNA Replication LOF		98.85	Serine proteases GOF		97.74	IKK inhibitor
	98.56	Interleukins GOF		98.58	Homeobox Gene GOF		96.58	Nucleophosmin inhibitor
	98.49	GPCR Subset GOF		98.56	Proteasome Pathway LOF		96.16	C2 domain containing LOF
	98.29	PPAR receptor agonist		98.16	Protein synthesis inhibitor		95.95	LIM class homeoboxes GOF
	98.02	Rho GTPase activating proteins LOF		97.98	Rho GTPase activating proteins LOF		95.83	Protein synthesis inhibitor
	97.92	Kinase anchoring proteins LOF		97.74	IKK inhibitor		95.3	Histone deacetylases LOF
	97.56	Estrogen receptor antagonist		97.7	FLT3 inhibitor
	97.34	Protein synthesis inhibitor		97.22	Nucleoporin LOF
	97.05	KCNJ11 modulator		97.09	Ribonucleotide reductase inhibitor
	96.77	CDK inhibitor		97.08	Structural maintenance of chromosomes proteins LOF
	96.64	HIV protease inhibitor		96.65	PKC inhibitor
	96.55	AHSP Pathway LOF		96.6	AHSP Pathway LOF
	96.31	NKL subclass homeoboxes and pseudogenes LOF		96.57	NFkB pathway inhibitor
	95.99	Serine proteases GOF		96.18	Topoisomerase inhibitor
	95.75	Ribonucleotide reductase inhibitor		95.89	Tubulin inhibitor
	95.58	PARP inhibitor		95.75	Retinoid receptor agonist
	95.35	Lysine acetyltransferases LOF
	95.23	Tubulin inhibitor
	95.17	C2 domain containing LOF
	95.08	Nucleoporin LOF

## Sheet: CMap classes - correlation
	TABLE S7. CMap classes with associated transcriptional signatures opposite to the different COVID-19 signatures used in this study (similarity score <-95).
	CMAP classes negatively correlating to signature			CMAP classes negatively correlating to signature			CMAP classes negatively correlating to signature
	COVIDCS Signature (Zhou et al. (2020))			CSs Signature (Xiong et al. (2020))			CSs[sc] Signature (Liao et al. (2020))
	Score	CMap class		Score	CMap class		Score	CMap class
	-99.82	S100 calcium binding proteins LOF		-98.77	Bromodomain Inhibitor		-99.99	Aminoacyl tRNA synthetases class II LOF
	-99.47	Leucine rich repeat kinase inhibitor		-98.64	Leucine rich repeat kinase inhibitor		-99.59	MEK inhibitor
	-99.36	JAK inhibitor		-98.47	Glucocorticoid receptor agonist		-99.53	Reverse transcriptase inhibitor
	-98.72	MEK inhibitor		-97.91	V type ATPases LOF		-99.08	Bacterial 30S ribosomal subunit inhibitor
	-98.66	Glucocorticoid receptor agonist		-97.02	JAK inhibitor		-99.07	PKA inhibitor
	-98.63	Bromodomain Inhibitor		-95.52	MEK inhibitor		-98.92	Glycogen synthase kinase inhibitor
	-97.24	HSP inhibitor					-98.75	PI3K inhibitor
	-96.55	VEGFR inhibitor					-98.2	Mitochondrial complex IV LOF
	-96.01	Aminoacyl tRNA synthetases class II LOF					-97.92	MDM inhibitor
	-95.99	RAF inhibitor					-97.2	Serotonin receptor agonist
	-95.6	Integrin subunits beta LOF					-97.17	RAF inhibitor
	-95.55	Rho associated kinase inhibitor					-97.05	X linked mental retardation group 1 LOF
	-95.03	Apolipoproteins LOF					-96.45	GPCR Subset GOF
							-95.11	EIF Proteins LOF

## Sheet: Genes + correlation
	TABLE S3. Genes that, when overexpressed, trigger transcriptional signatures that mimic the different COVID-19 signatures used in this study (similarity score >95).
	Overexpressed genes correlating to signature				Overexpressed genes correlating to signature				Overexpressed genes correlating to signature
	COVIDCS Signature (Zhou et al. (2020))				CSs Signature (Xiong et al. (2020))				CSs[sc] Signature (Liao et al. (2020))
	Score	Gene	Description		Score	Gene	Description		Score	Gene	Description
	99.91	BCL10	-		99.91	TNFRSF1A	Tumour necrosis factor (TNF) receptor family		99.95	TNFRSF1A	Tumour necrosis factor (TNF) receptor family
	99.91	TNFRSF1A	Tumour necrosis factor (TNF) receptor family		99.91	BCL10	-		99.91	IFNG	Interferons
	99.91	TNFRSF10A	Tumour necrosis factor (TNF) receptor family		99.91	CD40	Tumour necrosis factor (TNF) receptor family		99.91	BCL10	-
	99.91	IRF2	-		99.91	LYN	Src family		99.91	TNFRSF10A	Tumour necrosis factor (TNF) receptor family
	99.91	IL1R1	Interleukins and interleukin receptors		99.91	TNFRSF10A	Tumour necrosis factor (TNF) receptor family		99.91	SPIC	ETS Transcription Factors
	99.91	HLF	-		99.91	IRF5	-		99.91	IFNB1	Interferons
	99.91	CD40	Tumour necrosis factor (TNF) receptor family		99.91	TIRAP	-		99.91	HOXA5	Homeoboxes / ANTP class : HOXL subclass
	99.91	CCL2	Chemokine ligands		99.91	TANK	-		99.91	COX5A	Mitochondrial respiratory chain complex
	99.91	PIM1	PIM family		99.91	IRAK2	Interleukin-1 receptor-associated kinase (IRAK) family		99.91	BCL2L2	Serine/threonine phosphatases / Protein phosphatase 1, regulatory subunits
	99.91	TANK	-		99.91	NFE2L2	basic leucine zipper proteins		99.91	DUSP28	Protein tyrosine phosphatases / Class I Cys-based PTPs : Atypical dual specificity phosphatases
	99.91	NFE2L2	basic leucine zipper proteins		99.91	VPS28	-		99.91	FGR	Src family
	99.91	VPS28	-		99.91	EHF	-		99.91	LYN	Src family
	99.91	IRF5	-		99.91	HLF	-		99.88	CD40	Tumour necrosis factor (TNF) receptor family
	99.91	TIRAP	-		99.91	IL1R1	Interleukins and interleukin receptors		99.86	SRC	Src family
	99.91	SRM	-		99.91	CCL2	Chemokine ligands		99.81	ZNF562	Zinc fingers, C2H2-type
	99.91	FADD	-		99.91	IRF2	-		99.81	TIRAP	-
	99.91	LYN	Src family		99.91	IFI16	-		99.77	ADC	-
	99.91	IRAK2	Interleukin-1 receptor-associated kinase (IRAK) family		99.91	PIM1	PIM family		99.68	IRF5	-
	99.91	EBF1	-		99.91	AGTR1	Angiotensin receptors		99.68	LTBR	Tumor necrosis factor receptor superfamily
	99.86	IFNG	Interferons		99.91	TICAM2	-		99.58	RELB	NFkappaB transcription factor family
	99.86	TADA2A	-		99.91	GM2A	-		99.54	HOXB7	Homeoboxes / ANTP class : HOXL subclass
	99.86	SRC	Src family		99.91	FAIM	-		99.51	TADA2A	-
	99.86	SPIC	ETS Transcription Factors		99.91	CFLAR	Endogenous ligands		99.44	FADD	-
	99.86	IFNB1	Interferons		99.91	CXCL2	Endogenous ligands		99.44	SSBP4	-
	99.86	FAIM	-		99.86	SPIC	ETS Transcription Factors		99.31	NEK6	NIMA (never in mitosis gene a)- related kinase (NEK) family
	99.81	GPR119	GPCR / Class A : Orphans		99.86	SRC	Src family		99.03	CBR3	Short chain dehydrogenase/reductase superfamily / Classical SDR fold cluster 1
	99.81	POU5F1	Homeoboxes / POU class		99.86	NR2F6	COUP-TF-like receptors		99.03	MAP3K8	MAPKKK:STE-unique family
	99.81	LTBR	Tumor necrosis factor receptor superfamily		99.86	TADA2A	-		98.94	PBK	TOPK family
	99.81	HOXC10	Homeoboxes / ANTP class : HOXL subclass		99.86	SSBP4	-		98.89	HOXC10	Homeoboxes / ANTP class : HOXL subclass
	99.77	TRAF2	RING-type (C3HC4) zinc fingers		99.86	IL13	Interleukins and interleukin receptors		98.88	GATA3	GATA zinc finger domain containing
	99.77	RELB	NFkappaB transcription factor family		99.86	SPP1	Endogenous ligands		98.84	PHF13	Zinc fingers, PHD-type
	99.77	MAP2K6	MAPKK:STE7 family		99.81	LTBR	Tumor necrosis factor receptor superfamily		98.84	OTX2	Homeoboxes / PRD class
	99.74	RARA	Retinoic acid receptors		99.81	MAP2K6	MAPKK:STE7 family		98.82	RIPK2	Receptor interacting protein kinase (RIPK) family
	99.68	MAPK13	MAPK:p38 subfamily		99.81	TRAF2	RING-type (C3HC4) zinc fingers		98.75	GATA2	GATA zinc finger domain containing
	99.68	EHF	-		99.8	TRAF1	-		98.73	IRAK2	Interleukin-1 receptor-associated kinase (IRAK) family
	99.68	GPR4	GPCR / Class A : Orphans		99.77	HOXC10	Homeoboxes / ANTP class : HOXL subclass		98.69	VPS28	-
	99.68	MBNL1	Zinc fingers, CCCH-type domain containing		99.77	IFNG	Interferons		98.66	CSNK1A1L	Casein kinase 1 (CK1) family
	99.63	BAG1	-		99.77	ZNF583	Zinc fingers, C2H2-type		98.61	PRKCE	Eta subfamily
	99.63	HMGN5	High-mobility group / Canonical		99.72	MAP3K8	MAPKKK:STE-unique family		98.61	PASD1	-
	99.63	RNASET2	-		99.72	HAT1	Histone acetyltransferases (HATs)		98.56	CNOT3	-
	99.63	CALU	EF-hand domain containing		99.68	PRKACA	Protein kinase A		98.47	ZNF653	Zinc fingers, C2H2-type
	99.59	F2R	Protease activated receptors		99.63	LDHA	-		98.47	HPN	Serine peptidases / Transmembrane
	99.58	TRIM9	-		99.63	GADD45A	-		98.47	TIMP3	-
	99.58	DYNLL1	Cytoplasmic dyneins		99.58	KIAA0494	-		98.35	FOXA3	Forkhead boxes
	99.58	KIAA0494	-		99.58	HNF4A	Hepatocyte nuclear factor-4 receptors		98.33	HOXA9	Homeoboxes / ANTP class : HOXL subclass
	99.54	PUF60	RNA binding motif (RRM) containing		99.56	TIMM9	-		98.33	KLF6	Kruppel-like transcription factors
	99.54	SSX2	-		99.49	IFNB1	Interferons		98.24	CASP2	Caspases
	99.49	GPR139	GPCR / Class A : Orphans		99.49	RARA	Retinoic acid receptors		98.19	GPR107	GPCR / Unclassified : 7TM orphan receptors
	99.49	MAP3K8	MAPKKK:STE-unique family		99.46	CAPN1	EF-hand domain containing		98.15	AGPAT2	1-acylglycerol-3-phosphate O-acyltransferases
	99.45	PRKCE	Eta subfamily		99.44	FADD	-		97.92	POU5F1	Homeoboxes / POU class
	99.44	FLI1	ETS Transcription Factors		99.44	POLR2I	RNA polymerase subunits		97.8	EHF	-
	99.4	DUSP28	Protein tyrosine phosphatases / Class I Cys-based PTPs : Atypical dual specificity phosphatases		99.44	HLA-DPB1	Immunoglobulin superfamily / C1-set domain containing		97.71	PRKAG3	AMPK subfamily
	99.35	HBE1	-		99.44	MAT2A	-		97.69	LHX9	Homeoboxes / LIM class
	99.21	PAK4	PAKB subfamily		99.4	DLC1	Rho GTPase activating proteins		97.69	MAP2K6	MAPKK:STE7 family
	99.21	GADD45A	-		99.38	CTBP1	-		97.59	FKBP3	-
	99.21	B3GNT1	-		99.35	RELB	NFkappaB transcription factor family		97.58	RARA	Retinoic acid receptors
	99.21	TSPAN6	Tetraspanins		99.35	GADD45B	-		97.36	ASPH	-
	99.21	TUBD1	Tubulins		99.26	FBXO5	F-boxes / other		97.02	GGA2	-
	99.21	MRPL18	Mitochondrial ribosomal proteins / large subunits		99.26	COX4I1	Mitochondrial respiratory chain complex		96.95	TRAF2	RING-type (C3HC4) zinc fingers
	99.18	ZNF764	Zinc fingers, C2H2-type		99.21	HOXA5	Homeoboxes / ANTP class : HOXL subclass		96.91	CCBL1	Hydrogen sulphide synthesis
	99.17	FGR	Src family		99.21	CAV1	-		96.87	MPZL1	Immunoglobulin superfamily / V-set domain containing
	99.12	GATA2	GATA zinc finger domain containing		99.21	RND3	-		96.85	SMAD1	SMADs
	99.07	HDAC8	Histone deacetylases		99.17	DRD1	Dopamine receptors		96.76	OTX1	Homeoboxes / PRD class
	99.01	HSBP1	-		99.12	SMAD1	SMADs		96.62	HLF	-
	98.98	LIG1	-		99.06	HBE1	-		96.53	TLE1	WD repeat domain containing
	98.96	PRKACA	Protein kinase A		99.03	UBE3C	-		96.49	NXF1	-
	98.89	TAP1	ATP binding cassette transporters / subfamily B		99.03	MBNL2	Zinc fingers, CCCH-type domain containing		96.33	PBXIP1	-
	98.75	STAT1	SH2 domain containing		99.03	MRGPRX3	GPCR / Class A : Orphans		96.3	LSM6	-
	98.75	ACAT2	Lanosterol biosynthesis pathway		98.98	SACM1L	-		96.1	PIK3R3	Phosphatidylinositol kinases
	98.72	ZNF562	Zinc fingers, C2H2-type		98.98	ORMDL3	-		96.02	TPMT	-
	98.7	PLAT	Chymotrypsin		98.89	FOSL1	basic leucine zipper proteins		95.94	ASF1A	-
	98.61	LPAR1	GPCR / Class A : Lysophospholipid receptors : Lysophosphatidic acid		98.84	GATA2	GATA zinc finger domain containing		95.86	ELF4	ETS Transcription Factors
	98.52	OTX2	Homeoboxes / PRD class		98.82	NAB2	-		95.83	EBF1	-
	98.4	IL13	Interleukins and interleukin receptors		98.8	TNFRSF10B	Tumour necrosis factor (TNF) receptor family		95.21	HDAC1	Histone deacetylases
	98.38	IMPA1	Inositol monophosphatase		98.79	DUSP28	Protein tyrosine phosphatases / Class I Cys-based PTPs : Atypical dual specificity phosphatases		95.12	COQ3	-
	98.33	GMEB1	-		98.61	ELF4	ETS Transcription Factors
	98.33	TOR1A	-		98.61	PJA2	RING-type (C3HC4) zinc fingers
	98.29	GAPDH	-		98.61	BAG1	-
	98.29	MRPS2	Mitochondrial ribosomal proteins / small subunits		98.56	CEPT1	-
	98.22	PHF1	Zinc fingers, PHD-type		98.55	TSPAN6	Tetraspanins
	98.19	SACM1L	-		98.51	BNIP3	-
	98.18	UBE3C	-		98.43	FOSL2	basic leucine zipper proteins
	98.15	FOXA3	Forkhead boxes		98.41	ZFAND6	Zinc fingers, AN1-type domain containing
	98.1	CTBP1	-		98.38	POU5F1	Homeoboxes / POU class
	98.08	ASNS	-		98.38	FABP6	Fatty acid binding protein family
	98.08	FBP1	-		98.38	LIG1	-
	98.07	ELF4	ETS Transcription Factors		98.38	ZSWIM2	Zinc fingers, SWIM-type
	97.96	TNFRSF10B	Tumour necrosis factor (TNF) receptor family		98.29	HLA-DRB3	Immunoglobulin superfamily / C1-set domain containing
	97.96	SMAD3	SMADs		98.25	TIMP3	-
	97.93	IFNAR2	Interferon receptor family		98.16	ZNF764	Zinc fingers, C2H2-type
	97.89	HOXB13	Homeoboxes / ANTP class : HOXL subclass		98.15	SFPQ	RNA binding motif (RRM) containing
	97.84	GATAD2B	GATA zinc finger domain containing		98.11	CYP24A1	Cytochrome P450s
	97.75	MAD2L1BP	-		98.08	SPRY2	-
	97.69	CASD1	-		97.92	TXNL1	-
	97.63	ZNF680	Zinc fingers, C2H2-type		97.88	HOXC4	Homeoboxes / ANTP class : HOXL subclass
	97.59	TNF	Tumor necrosis factor (ligand) superfamily		97.8	CARD9	-
	97.41	COMT	Catecholamine turnover		97.73	HMOX2	Haem oxygenase
	97.19	TRAF1	-		97.71	ATP5S	-
	97.17	OSR2	Zinc fingers, C2H2-type		97.69	HOXB13	Homeoboxes / ANTP class : HOXL subclass
	97.17	SLC25A4	Mitochondrial nucleotide transporter subfamily		97.64	FBXW7	F-boxes / WD-40 domains
	97.11	HSF1	-		97.55	PHF5A	Zinc fingers, PHD-type
	97.04	TSPAN4	Tetraspanins		97.53	COMT	Catecholamine turnover
	97	HDAC3	Histone deacetylases		97.45	GGA2	-
	96.99	TNFRSF19	Tumour necrosis factor (TNF) receptor family		97.41	PRKCE	Eta subfamily
	96.9	LDHA	-		97.41	DLX3	Homeoboxes / ANTP class : NKL subclass
	96.89	EDNRB	Endothelin receptors		97.37	IL1B	Interleukins and interleukin receptors
	96.74	CNOT8	-		97.3	ZNF595	Zinc fingers, C2H2-type
	96.71	PRKCZ	Iota subfamily		97.26	RBX1	RING-type (C3HC4) zinc fingers
	96.7	GPR107	GPCR / Unclassified : 7TM orphan receptors		97.22	STAT1	SH2 domain containing
	96.67	RPA2	-		97.21	CDKN1B	-
	96.67	RIPK2	Receptor interacting protein kinase (RIPK) family		97.18	UGCG	Glycosyltransferase family 2 domain containing
	96.61	RARG	Retinoic acid receptors		97.08	FOXA3	Forkhead boxes
	96.55	CAPN1	EF-hand domain containing		96.99	ARPC3	Actin related protein 2/3 complex subunits
	96.46	ZNF548	Zinc fingers, C2H2-type		96.97	OVOL2	Zinc fingers, C2H2-type
	96.4	ADSS	-		96.94	LMNA	Intermediate filaments type V, lamins
	96.35	HOXA5	Homeoboxes / ANTP class : HOXL subclass		96.9	TNF	Tumor necrosis factor (ligand) superfamily
	96.3	JUNB	basic leucine zipper proteins		96.83	DYNLL1	Cytoplasmic dyneins
	96.25	CDKN1B	-		96.81	GPR139	GPCR / Class A : Orphans
	96.25	FOXJ2	Forkhead boxes		96.76	OSR2	Zinc fingers, C2H2-type
	96.25	LPL	-		96.75	TUBD1	Tubulins
	96.21	COX5A	Mitochondrial respiratory chain complex		96.66	PRSS23	Serine peptidases / Serine peptidases
	96.11	PIK3R3	Phosphatidylinositol kinases		96.54	GSTP1	Glutathione S-transferases
	96.11	LGR5	GPCR / Class A : Orphans		96.36	HSBP1	-
	95.92	MEST	-		96.34	TCF4	Basic helix-loop-helix proteins
	95.87	PPAP2A	Lipid phosphate phosphatases		96.3	SRM	-
	95.83	SRD5A1	-		96.29	CKS1B	-
	95.83	ACADS	-		95.97	CNOT7	-
	95.7	ETFA	-		95.96	PAK4	PAKB subfamily
	95.68	FOSL1	basic leucine zipper proteins		95.96	IP6K2	-
	95.49	GGA2	-		95.95	PEX13	-
	95.41	E2F6	-		95.88	PDLIM1	-
	95.4	HNF4A	Hepatocyte nuclear factor-4 receptors		95.86	ARRB1	-
	95.29	SNX7	Sorting nexins		95.6	NFIL3	basic leucine zipper proteins
	95.27	RBX1	RING-type (C3HC4) zinc fingers		95.51	UQCRFS1	Mitochondrial respiratory chain complex / Complex III
	95.04	RRAGC	-		95.47	CHAF1B	WD repeat domain containing
	95.04	ITGB2	Integrins		95.46	CIRBP	RNA binding motif (RRM) containing
					95.37	SMAD3	SMADs
					95.37	RNF11	RING-type (C3HC4) zinc fingers
					95.3	FGFRL1	Immunoglobulin superfamily / I-set domain containing
					95.29	PSMB9	Proteasome (prosome, macropain) subunits
					95.28	ZER1	ZYG11 cell cycle regulator family
					95.25	LDHB	-
					95.22	CASD1	-
					95.19	KNG1	Endogenous ligands
					95	DCP1A	-

## Sheet: Genes - correlation
	TABLE S4. Genes that, when downregulated, trigger transcriptional signatures that mimic the different COVID-19 signatures used in this study (similarity score >95).
	Downregulated genes correlating to signature				Downregulated genes correlating to signature				Downregulated genes correlating to signature
	COVIDCS Signature (Zhou et al. (2020))				CSs Signature (Xiong et al. (2020))				CSs[sc] Signature (Liao et al. (2020))
	Score	Gene	Description		Score	Gene	Description		Score	Gene	Description
	99.95	TTC3	RING-type (C3HC4) zinc fingers		99.95	BTG1	-		99.95	ZNF768	Zinc fingers, C2H2-type
	99.95	TSLP	-		99.95	PROCR	CD molecules		99.95	WNT9A	Wingless-type MMTV integration sites
	99.95	ZNHIT3	Zinc fingers, HIT-type		99.95	FAH	-		99.95	UFD1L	-
	99.95	ZNF217	Zinc fingers, C2H2-type		99.95	HIST2H2BE	Histones / Replication-dependent		99.95	STK36	Unc-51-like kinase (ULK) family
	99.95	WNT5A	Endogenous ligands		99.95	TSSC4	-		99.95	SLC35A1	SLC35 family of nucleotide sugar transporters
	99.95	WNT10B	Wingless-type MMTV integration sites		99.95	TTC3	RING-type (C3HC4) zinc fingers		99.95	SFPQ	RNA binding motif (RRM) containing
	99.95	VAMP3	Vesicle-associated membrane proteins		99.95	ETFB	-		99.95	SEC61A2	-
	99.95	TUBB3	Tubulins		99.95	WNT10B	Wingless-type MMTV integration sites		99.95	RYK	Type XV RTKs: RYK
	99.95	SRPRB	-		99.95	VPS28	-		99.95	RRM1	Ribonucleoside-diphosphate reductases
	99.95	SRM	-		99.95	RBM15	RNA binding motif (RRM) containing		99.95	PUF60	RNA binding motif (RRM) containing
	99.95	SQSTM1	-		99.95	MMP14	Matrix metallopeptidase		99.95	PROCR	CD molecules
	99.95	SMNDC1	Tudor domain containing		99.95	SRPRB	-		99.95	PMM2	-
	99.95	SLC35A1	SLC35 family of nucleotide sugar transporters		99.95	ATP11B	Phospholipid-transporting ATPases		99.95	PC	Carboxylases
	99.95	SFPQ	RNA binding motif (RRM) containing		99.95	ERCC3	General transcription factors		99.95	PAF1	-
	99.95	S100A4	EF-hand domain containing		99.95	TSC22D1	-		99.95	MED1	-
	99.95	RIPK2	Receptor interacting protein kinase (RIPK) family		99.95	PIK3R3	Phosphatidylinositol kinases		99.95	IKBKAP	Elongator acetyltransferase complex subunits
	99.95	RBPJ	-		99.95	ZNF217	Zinc fingers, C2H2-type		99.95	HIST1H2AC	Histones / Replication-dependent
	99.95	RBM15B	RNA binding motif (RRM) containing		99.95	TUBB3	Tubulins		99.95	FAM114A2	-
	99.95	PROCR	CD molecules		99.95	MB	-		99.95	ETFB	-
	99.95	PREB	WD repeat domain containing		99.95	TOPBP1	-		99.95	DICER1	-
	99.95	NRBP1	NRBP family		99.95	DERA	-		99.95	BTG1	-
	99.95	NR2F6	COUP-TF-like receptors		99.95	PPIF	-		99.92	UBAP1	-
	99.95	NFKBIA	Ankyrin repeat domain containing		99.95	LHPP	-		99.92	TSSC4	-
	99.95	MRPS2	Mitochondrial ribosomal proteins / small subunits		99.95	ETNK1	-		99.92	TES	-
	99.95	MMP14	Matrix metallopeptidase		99.95	GPER	-		99.92	STAM2	-
	99.95	MB	-		99.95	WNT5A	Endogenous ligands		99.92	RRM2	Ribonucleoside-diphosphate reductases
	99.95	MAP3K14	MAPKKK:STE-unique family		99.95	MEGF9	-		99.92	PAK4	PAKB subfamily
	99.95	IMPA1	Inositol monophosphatase		99.95	HPRT1	-		99.92	FAH	-
	99.95	IKBKAP	Elongator acetyltransferase complex subunits		99.95	RBPJ	-		99.92	ERLIN1	-
	99.95	HSP90B1	Heat shock proteins / HSPC		99.95	RNMT	-		99.92	CCDC86	-
	99.95	HIST2H2BE	Histones / Replication-dependent		99.95	PREB	WD repeat domain containing		99.92	CASC3	-
	99.95	HIST1H2BD	Histones / Replication-dependent		99.95	BLVRA	-		99.92	BUB1B	Bub family
	99.95	FOSL2	basic leucine zipper proteins		99.95	ABCB1	ATP binding cassette transporters / subfamily B		99.92	ABHD2	Abhydrolase domain containing
	99.95	ETFB	-		99.95	ALDH7A1	Aldehyde dehydrogenases		99.89	PNN	-
	99.95	CHIC2	-		99.95	MRPS2	Mitochondrial ribosomal proteins / small subunits		99.89	WNT10B	Wingless-type MMTV integration sites
	99.95	ATP11B	Phospholipid-transporting ATPases		99.92	MAP3K14	MAPKKK:STE-unique family		99.89	UBE2D1	Ubiquitin-conjugating enzymes E2
	99.95	ARAF	RAF family		99.92	PNN	-		99.89	CLCN3	Ion channels / Chloride channels : Voltage-sensitive
	99.95	AKR1A1	Aldo-keto reductases		99.92	ZNHIT3	Zinc fingers, HIT-type		99.87	CYCS	-
	99.92	STK38L	NDR family		99.92	CAV1	-		99.87	LAMP2	CD molecules
	99.92	AHR	Basic helix-loop-helix proteins		99.92	BCL7B	-		99.87	KSR2	RAF family
	99.92	VPS28	-		99.92	SLC5A6	Sodium iodide symporter, sodium-dependent multivitamin transporter and sodium-coupled monocarboxylate transporters		99.87	ERAP2	Aminopeptidase N
	99.92	TM9SF2	-		99.92	TRAFD1	-		99.87	CLPB	Ankyrin repeat domain containing
	99.92	TLE3	WD repeat domain containing		99.92	EPHB2	Type XIII RTKs: Ephrin receptor family		99.84	TSPAN4	Tetraspanins
	99.92	RNF186	RING-type (C3HC4) zinc fingers		99.92	POLB	DNA polymerases		99.84	SOAT1	-
	99.92	PLP2	-		99.92	RNF186	RING-type (C3HC4) zinc fingers		99.84	NR2F6	COUP-TF-like receptors
	99.92	NUP93	-		99.89	FAM114A2	-		99.84	IDH3A	-
	99.92	MED1	-		99.89	MAT2A	-		99.84	EAPP	-
	99.92	GPR176	GPCR / Class A : Orphans		99.89	G2E3	Zinc fingers, PHD-type		99.82	SRM	-
	99.92	GMNN	-		99.89	PLP2	-		99.82	PCNA	-
	99.92	ERCC3	General transcription factors		99.89	NFKBIA	Ankyrin repeat domain containing		99.82	MAP3K14	MAPKKK:STE-unique family
	99.92	DERA	-		99.89	CHAC1	-		99.79	TNKS2	Ankyrin repeat domain containing
	99.92	CLCN3	Ion channels / Chloride channels : Voltage-sensitive		99.89	KISS1R	GPCR / Class A : RF amide peptide receptors		99.79	TMEM2	-
	99.92	CBR1	Prostaglandin synthases		99.89	RBX1	RING-type (C3HC4) zinc fingers		99.79	HIST2H2BE	Histones / Replication-dependent
	99.92	BUB1B	Bub family		99.89	OXA1L	-		99.79	G2E3	Zinc fingers, PHD-type
	99.89	RAVER1	RNA binding motif (RRM) containing		99.88	KIAA0494	-		99.79	BECN1	-
	99.89	PNN	-		99.87	MED1	-		99.76	SMAD1	SMADs
	99.89	IL20	Interleukins and interleukin receptors		99.87	SLC35A1	SLC35 family of nucleotide sugar transporters		99.76	MTX2	-
	99.89	HTRA1	Serine peptidases / Serine peptidases		99.87	CEBPD	basic leucine zipper proteins		99.76	MAX	Basic helix-loop-helix proteins
	99.89	G2E3	Zinc fingers, PHD-type		99.87	IMPA1	Inositol monophosphatase		99.74	ZAK	MLK subfamily
	99.89	FAM114A2	-		99.87	PRKACA	Protein kinase A		99.74	ERCC3	General transcription factors
	99.89	FABP4	Fatty acid binding protein family		99.85	B4GALNT1	Beta 4-glycosyltransferases		99.68	RAVER1	RNA binding motif (RRM) containing
	99.89	CTNND1	Catenins		99.84	CLCN3	Ion channels / Chloride channels : Voltage-sensitive		99.68	ZNF786	Zinc fingers, C2H2-type
	99.89	CEBPD	basic leucine zipper proteins		99.84	BUB1B	Bub family		99.68	TM9SF2	-
	99.89	BCL7B	-		99.84	DLX3	Homeoboxes / ANTP class : NKL subclass		99.68	FAF1	UBX domain containing
	99.89	ARPC1A	Actin related protein 2/3 complex subunits		99.84	SIK1	QIK subfamily		99.66	TTC3	RING-type (C3HC4) zinc fingers
	99.87	ZNF318	Zinc fingers, C2H2-type		99.84	BRAP	RING-type (C3HC4) zinc fingers		99.66	TNFRSF21	Tumour necrosis factor (TNF) receptor family
	99.87	WDR6	WD repeat domain containing		99.84	TBXA2R	GPCR / Class A : Prostanoid receptors		99.66	RNF167	RING-type (C3HC4) zinc fingers
	99.87	HSD17B11	Short chain dehydrogenase/reductase superfamily / Classical SDR fold cluster 3		99.84	ATP5D	ATPases / F-type		99.63	USP6NL	-
	99.86	EAPP	-		99.84	ATG4D	-		99.63	POLA1	DNA polymerases
	99.84	PIK3R3	Phosphatidylinositol kinases		99.84	IL23R	IL-12 receptor family		99.61	ZNF559	Zinc fingers, C2H2-type
	99.84	TRIB3	Trbl family		99.83	SFPQ	RNA binding motif (RRM) containing		99.61	TP53	-
	99.84	RRM1	Ribonucleoside-diphosphate reductases		99.82	PMM2	-		99.58	ATP11B	Phospholipid-transporting ATPases
	99.84	HDGFRP3	-		99.82	PHB2	-		99.55	PHB2	-
	99.84	CFLAR	Endogenous ligands		99.82	LAMTOR3	-		99.54	RIT1	-
	99.84	CDKN1B	-		99.82	ZNF791	Zinc fingers, C2H2-type		99.53	TXN	-
	99.84	CAV1	-		99.82	SMNDC1	Tudor domain containing		99.53	NDUFS6	Mitochondrial respiratory chain complex / Complex I
	99.84	AURKB	Aurora kinase		99.82	AKR1C3	Prostaglandin synthases		99.53	HSPD1	Heat Shock Proteins / Chaperonins
	99.82	TBX2	T-boxes		99.82	S100A4	EF-hand domain containing		99.53	FABP4	Fatty acid binding protein family
	99.82	SCAP	WD repeat domain containing		99.82	ELL3	-		99.53	ARPC5	Actin related protein 2/3 complex subunits
	99.82	PHKB	-		99.82	IDH3B	-		99.51	NUP93	-
	99.82	MEGF9	-		99.82	STX1A	-		99.51	MAT2A	-
	99.82	HPRT1	-		99.82	NF2	A-kinase anchor proteins		99.5	SHB	SH2 domain containing
	99.82	GPER	-		99.79	KSR2	RAF family		99.5	GOLIM4	-
	99.82	ERLIN1	-		99.79	RRM1	Ribonucleoside-diphosphate reductases		99.49	ID1	Basic helix-loop-helix proteins
	99.82	ALDH7A1	Aldehyde dehydrogenases		99.79	PAX8	Paired boxes		99.47	CTNNB1	Catenins
	99.81	DHFR	Oxidoreductases		99.79	FABP4	Fatty acid binding protein family		99.47	BOLA1	-
	99.79	PHB2	-		99.79	RIPK2	Receptor interacting protein kinase (RIPK) family		99.47	AKAP8L	-
	99.79	PEX12	-		99.79	ACAT1	Lanosterol biosynthesis pathway		99.42	TOX2	-
	99.79	NTRK3	Type VII RTKs: Neurotrophin receptor/Trk family		99.79	CAPN1	EF-hand domain containing		99.42	SYNE2	-
	99.76	PEPD	Methionyl aminopeptidase		99.79	SMU1	WD repeat domain containing		99.42	NUP133	-
	99.76	LPAR6	GPCR / Class A : Lysophospholipid receptors : Lysophosphatidic acid		99.79	ME1	-		99.42	ARHGEF6	Rho guanine nucleotide exchange factors
	99.76	GOLIM4	-		99.79	NCOA3	Histone acetyltransferases		99.4	CEBPD	basic leucine zipper proteins
	99.76	EPB41L2	-		99.79	SENP2	-		99.39	TMEM97	-
	99.76	DRAP1	-		99.79	DYNLL1	Cytoplasmic dyneins		99.39	NDUFAF4	Mitochondrial respiratory chain complex assembly factors
	99.74	E2F3	-		99.79	ZFYVE19	Zinc fingers, FYVE domain containing		99.37	AURKB	Aurora kinase
	99.74	WRN	-		99.76	SEC61A2	-		99.31	LYN	Src family
	99.74	TOX2	-		99.76	NUP93	-		99.29	SRPRB	-
	99.74	TFDP1	-		99.76	RAMP1	Receptor (G protein-coupled) activity modifying proteins		99.29	PAN2	Ubiquitin-specific peptidases
	99.74	PXMP2	-		99.76	POLR1C	RNA polymerase subunits		99.29	OXTR	GPCR / Class A : Vasopressin and oxytocin receptors
	99.74	MEOX2	Homeoboxes / ANTP class : HOXL subclass		99.76	GMNN	-		99.29	KIF5C	Kinesins
	99.74	INSIG1	-		99.76	CD99	CD molecules		99.29	CAB39	-
	99.74	GTF2E2	General transcription factors		99.76	AK2	Adenylate kinases		99.27	ARPC1A	Actin related protein 2/3 complex subunits
	99.74	FDPS	Lanosterol biosynthesis pathway		99.76	GPR56	Adhesion Class GPCRs		99.26	DERA	-
	99.74	DICER1	-		99.76	CASP14	Caspases		99.24	MTERFD1	-
	99.74	DCXR	Short chain dehydrogenase/reductase superfamily / Classical SDR fold cluster 1		99.76	HYOU1	Heat shock proteins / HSP70		99.24	DLX2	Homeoboxes / ANTP class : NKL subclass
	99.71	ID1	Basic helix-loop-helix proteins		99.74	DRAP1	-		99.21	DRAP1	-
	99.71	ZNF791	Zinc fingers, C2H2-type		99.74	CHMP2A	Charged multivesicular body proteins		99.18	MOK	RCK family
	99.71	SENP2	-		99.74	ZNF331	Zinc fingers, C2H2-type		99.18	DECR1	Short chain dehydrogenase/reductase superfamily / Classical SDR fold cluster 1
	99.71	NUAK1	NuaK subfamily		99.74	E2F4	-		99.17	IGFBP5	insulin-like growth factor (IGF) binding proteins
	99.71	GHR	Prolactin receptor family		99.74	NR2F6	COUP-TF-like receptors		99.16	PIM2	PIM family
	99.71	DLX3	Homeoboxes / ANTP class : NKL subclass		99.74	TMEM109	-		99.16	VPS28	-
	99.71	ATG4D	-		99.74	GCA	EF-hand domain containing		99.16	HIGD2A	-
	99.7	TCEB3C	-		99.74	TYK2	Janus kinase (JakA) family		99.16	FPGS	-
	99.69	MAT2A	-		99.72	PAPD7	-		99.16	CREB3	basic leucine zipper proteins
	99.68	TBXA2R	GPCR / Class A : Prostanoid receptors		99.71	NRBP1	NRBP family		99.15	ACAT1	Lanosterol biosynthesis pathway
	99.68	TBK1	IKK family		99.71	CBR1	Prostaglandin synthases		99.13	MEOX2	Homeoboxes / ANTP class : HOXL subclass
	99.68	GATA2	GATA zinc finger domain containing		99.71	CDCA4	-		99.12	TFE3	Basic helix-loop-helix proteins
	99.68	BAZ1B	Zinc fingers, PHD-type		99.71	HSPA5	Heat shock proteins / HSP70		99.05	BCKDK	Pyruvate dehydrogenase kinase (PDHK) family
	99.66	TSC22D1	-		99.68	KIF5C	Kinesins		99.03	RFC5	ATPases / AAA-type
	99.66	HIGD2A	-		99.68	HSPD1	Heat Shock Proteins / Chaperonins		99.03	COPS7A	-
	99.66	FAF1	UBX domain containing		99.68	CBS	Hydrogen sulphide synthesis		99	GSTT1	Glutathione S-transferases / Soluble
	99.63	MERTK	Type XI RTKs: TAM (TYRO3-, AXL- and MER-TK) receptor family		99.68	IL5	Interleukins and interleukin receptors		98.97	QRFPR	GPCR / Class A : RF amide peptide receptors
	99.63	TAGAP	Rho GTPase activating proteins		99.68	DAXX	-		98.97	ARHGEF7	Rho guanine nucleotide exchange factors
	99.63	RNMT	-		99.68	CAMK2D	CAMK2 family		98.95	SRSF3	RNA binding motif (RRM) containing
	99.63	RBM15	RNA binding motif (RRM) containing		99.68	SUZ12	Zinc fingers, C2H2-type		98.92	PET112	-
	99.61	WHSC1	Zinc fingers, PHD-type		99.66	IKBKAP	Elongator acetyltransferase complex subunits		98.87	OGFOD1	-
	99.61	KIAA0753	-		99.66	SRSF3	RNA binding motif (RRM) containing		98.86	ZNF217	Zinc fingers, C2H2-type
	99.59	GPR78	GPCR / Class A : Orphans		99.66	CNOT3	-		98.86	WWTR1	Hippo Signaling
	99.58	CHMP2A	Charged multivesicular body proteins		99.66	GHR	Prolactin receptor family		98.84	RAD54L	-
	99.56	KSR2	RAF family		99.66	AURKAIP1	-		98.82	TOMM22	-
	99.55	SLC5A6	Sodium iodide symporter, sodium-dependent multivitamin transporter and sodium-coupled monocarboxylate transporters		99.66	SCAP	WD repeat domain containing		98.79	S100A4	EF-hand domain containing
	99.55	HSPD1	Heat Shock Proteins / Chaperonins		99.65	DCXR	Short chain dehydrogenase/reductase superfamily / Classical SDR fold cluster 1		98.76	TEAD2	-
	99.55	FAH	-		99.63	P4HA2	-		98.76	FDX1	-
	99.54	ZFYVE19	Zinc fingers, FYVE domain containing		99.61	OGFOD1	-		98.74	STAP2	-
	99.53	HYOU1	Heat shock proteins / HSP70		99.61	MDH2	-		98.71	NQO1	-
	99.53	UFD1L	-		99.61	GNAQ	-		98.67	NFE2L2	basic leucine zipper proteins
	99.53	GSTP1	Glutathione S-transferases		99.61	SLC7A9	SLC7 family		98.64	ZNF131	BTB/POZ domain containing
	99.53	GPR56	Adhesion Class GPCRs		99.58	OXER1	GPCR / Class A : Leukotriene receptors		98.63	CREG1	-
	99.52	TPI1	-		99.58	LIG1	-		98.56	TUBB3	Tubulins
	99.52	SIK1	QIK subfamily		99.58	SPDEF	ETS Transcription Factors		98.55	LSM6	-
	99.5	GPX4	-		99.58	XBP1	basic leucine zipper proteins		98.52	ZNHIT3	Zinc fingers, HIT-type
	99.5	TIAM1	Rho guanine nucleotide exchange factors		99.58	HUS1	-		98.44	NNT	-
	99.5	MRPL12	Mitochondrial ribosomal proteins / large subunits		99.58	CTRB1	-		98.34	AKR1C3	Prostaglandin synthases
	99.47	F11	Chymotrypsin		99.55	SRM	-		98.29	PYCRL	-
	99.47	S100A11	EF-hand domain containing		99.55	UBE2C	Ubiquitin-conjugating enzymes E2		98.18	HTRA1	Serine peptidases / Serine peptidases
	99.47	PPIF	-		99.55	SMARCB1	-		98.15	UCK2	-
	99.47	FDFT1	Lanosterol biosynthesis pathway		99.54	CAPSL	EF-hand domain containing		98.15	KIF21B	Kinesins
	99.47	DDB2	WD repeat domain containing		99.54	CBFB	-		98.13	IRAK2	Interleukin-1 receptor-associated kinase (IRAK) family
	99.45	TOMM34	Tetratricopeptide (TTC) repeat domain containing		99.54	AFP	-		98.11	NUAK1	NuaK subfamily
	99.45	HSPA5	Heat shock proteins / HSP70		99.5	ENDOG	-		98.1	MB	-
	99.45	CREG1	-		99.5	VAMP3	Vesicle-associated membrane proteins		98.08	ENDOG	-
	99.42	LSM6	-		99.5	DHRS3	Short chain dehydrogenase/reductase superfamily / Classical SDR fold cluster 3		98	PSMF1	Proteasome (prosome, macropain) subunits
	99.42	CEPT1	-		99.47	IP6K1	-		98	MMP14	Matrix metallopeptidase
	99.42	ARHGEF5	Rho guanine nucleotide exchange factors		99.46	MAP2K5	MAPKK:STE7 family		97.98	HGS	Zinc fingers, FYVE domain containing
	99.39	SUPT4H1	-		99.45	ZNF787	Zinc fingers, C2H2-type		97.94	IL20	Interleukins and interleukin receptors
	99.39	ZNF433	Zinc fingers, C2H2-type		99.42	FABP5	Fatty acid-binding proteins		97.94	MAPK1IP1L	-
	99.39	PUF60	RNA binding motif (RRM) containing		99.42	GLI3	Zinc fingers, C2H2-type		97.93	SLK	SLK subfamily
	99.39	GRWD1	WD repeat domain containing		99.42	CAST	-		97.92	KAZALD1	Immunoglobulin superfamily / I-set domain containing
	99.39	ERAP2	Aminopeptidase N		99.41	TWF2	Twinfilin subfamily		97.9	RFC2	ATPases / AAA-type
	99.38	ANKRD49	Ankyrin repeat domain containing		99.41	TMEM110	-		97.84	EPHB4	Type XIII RTKs: Ephrin receptor family
	99.37	PCBD1	-		99.4	CRADD	-		97.82	GHR	Prolactin receptor family
	99.36	ZNF787	Zinc fingers, C2H2-type		99.4	SUPT4H1	-		97.79	RANBP9	-
	99.36	RFC1	ATPases / AAA-type		99.4	CTSH	Cathepsins		97.79	CPE	Carboxypeptidase A
	99.35	CANX	-		99.39	PIM2	PIM family		97.75	CSNK2A1	Casein kinase 2 (CK2) family
	99.34	SYNE2	-		99.39	TDRD3	Tudor domain containing		97.74	SLC25A14	Mitochondrial uncoupling proteins
	99.34	CASC3	-		99.39	CDK16	Cyclin-dependent kinases, TAIRE subfamily		97.7	NISCH	-
	99.32	UBAP1	-		99.37	SMAD7	SMADs		97.66	EIF3J	-
	99.32	SV2A	Major facilitator superfamily (MFS) of transporters		99.36	WHSC1	Zinc fingers, PHD-type		97.63	SNX11	Sorting nexins
	99.32	POLR1C	RNA polymerase subunits		99.34	SQRDL	-		97.61	UBE2A	Ubiquitin-conjugating enzymes E2
	99.32	CDK19	Cyclin-dependent kinases, CDK8 subfamily		99.34	CEP72	-		97.61	TRIM13	RING-type (C3HC4) zinc fingers
	99.29	PARP1	Poly (ADP-ribose) polymerases		99.32	OXTR	GPCR / Class A : Vasopressin and oxytocin receptors		97.59	PACSIN3	-
	99.29	RRM2	Ribonucleoside-diphosphate reductases		99.32	ARAF	RAF family		97.58	TSC22D1	-
	99.29	KLF3	Kruppel-like transcription factors		99.3	TWIST1	Basic helix-loop-helix proteins		97.39	PIAS4	Zinc fingers, MIZ-type
	99.29	DSE	-		99.3	PAFAH1B1	WD repeat domain containing		97.35	KIAA0907	-
	99.29	CDK5	Cyclin-dependent kinases, CDK5 subfamily		99.29	KIAA0753	-		97.33	DCXR	Short chain dehydrogenase/reductase superfamily / Classical SDR fold cluster 1
	99.29	ATP5D	ATPases / F-type		99.29	F2R	Protease activated receptors		97.32	RBM15	RNA binding motif (RRM) containing
	99.29	AK2	Adenylate kinases		99.24	ERAP2	Aminopeptidase N		97.31	ZNF791	Zinc fingers, C2H2-type
	99.26	METRN	-		99.24	PTPN11	Protein tyrosine phosphatases		97.26	SMOX	-
	99.26	ELL3	-		99.24	ACAA1	-		97.24	TNFSF15	Tumor necrosis factor (ligand) superfamily
	99.25	STAT5B	SH2 domain containing		99.24	TP53BP2	Ankyrin repeat domain containing		97.2	SLC11A2	SLC11 family of proton-coupled metal ion transporters
	99.23	ZNF768	Zinc fingers, C2H2-type		99.23	ZNF768	Zinc fingers, C2H2-type		97.17	SYT1	Synaptotagmins
	99.21	KIAA0494	-		99.22	POLE2	DNA polymerases		97.17	HDAC11	Histone deacetylases
	99.19	SUZ12	Zinc fingers, C2H2-type		99.21	ACBD3	A-kinase anchor proteins		97.06	CDKN1B	-
	99.17	ZNF589	Zinc fingers, C2H2-type		99.17	FTCD	-		97.04	PCSK9	Subtilisin
	99.16	E2F4	-		99.16	SOAT2	-		97.03	HRSP12	-
	99.13	KIF5C	Kinesins		99.15	TRIP10	-		96.97	PAX8	Paired boxes
	99.13	FGFR1	Type V RTKs: FGF (fibroblast growth factor) receptor family		99.14	RXRG	Retinoid X receptors		96.93	MED15	-
	99.13	F2R	Protease activated receptors		99.13	FDPS	Lanosterol biosynthesis pathway		96.84	SLC7A5	SLC7 family
	99.04	SLC7A9	SLC7 family		99.13	SNX2	Sorting nexins		96.78	CYB5A	Cytochrome b genes
	99.04	RAP1GDS1	Armadillo repeat containing		99.13	NUDCD3	-		96.75	SFMBT1	Sterile alpha motif (SAM) domain containing
	99.03	CYB5A	Cytochrome b genes		99.11	AKAP8L	-		96.71	UNC13B	-
	99.03	PLK1	Polo-like kinase (PLK) family		99.09	HSP90B1	Heat shock proteins / HSPC		96.68	GNG8	-
	99.01	HAT1	Histone acetyltransferases (HATs)		99.08	RIT1	-		96.65	PRKCH	Eta subfamily
	98.97	RAMP1	Receptor (G protein-coupled) activity modifying proteins		99.07	PPAT	Phosphoribosyl pyrophosphate amidotransferase		96.56	XPNPEP1	Methionyl aminopeptidase
	98.95	LTA4H	Hydrolases		99.05	KLF3	Kruppel-like transcription factors		96.46	USP20	Ubiquitin-specific peptidases
	98.92	PLD4	-		99.03	PEPD	Methionyl aminopeptidase		96.41	DFFB	-
	98.92	SLC39A8	SLC39 family of metal ion transporters		99.03	CDK19	Cyclin-dependent kinases, CDK8 subfamily		96.31	ZNF331	Zinc fingers, C2H2-type
	98.91	PC	Carboxylases		99	IL27	Interleukins and interleukin receptors		96.31	TYMS	Methyltransferases
	98.9	SYNGR3	-		98.97	CDKN1B	-		96.27	B3GAT3	Beta-1,3-glucuronyltransferases
	98.9	SPDEF	ETS Transcription Factors		98.97	ARNTL	Basic helix-loop-helix proteins		96.24	PLK1	Polo-like kinase (PLK) family
	98.88	NSF	ATPases / AAA-type		98.95	RPS6KA4	MSK subfamily		96.22	HOXC10	Homeoboxes / ANTP class : HOXL subclass
	98.88	TNFRSF21	Tumour necrosis factor (TNF) receptor family		98.94	PRR15L	-		96.19	F12	Chymotrypsin
	98.87	NAT1	-		98.92	PSMA3	Proteasome subunits		96.18	CHMP2A	Charged multivesicular body proteins
	98.87	HNF1A	Homeoboxes / HNF class		98.92	FOSL2	basic leucine zipper proteins		96.08	GPR176	GPCR / Class A : Orphans
	98.87	C2CD2	-		98.92	AXIN1	Serine/threonine phosphatases / Protein phosphatase 1, regulatory subunits		96.04	FOSL1	basic leucine zipper proteins
	98.85	ETNK1	-		98.89	SNW1	-		95.95	EXOSC4	-
	98.84	TCTA	-		98.89	CARD9	-		95.9	CGRRF1	RING-type (C3HC4) zinc fingers
	98.84	PGM1	-		98.89	JAG1	CD molecules		95.86	KIAA0753	-
	98.84	BCL9	-		98.89	ABCF2	ATP binding cassette transporters / subfamily F		95.84	TARBP1	-
	98.83	SLC6A14	Glycine transporter subfamily		98.89	NEK4	NIMA (never in mitosis gene a)- related kinase (NEK) family		95.83	PTPN11	Protein tyrosine phosphatases
	98.82	MAPK1IP1L	-		98.87	PET112	-		95.82	PSMB1	Proteasome subunits
	98.78	KRT8	Intermediate filaments type II, keratins (basic)		98.87	GPR78	GPCR / Class A : Orphans		95.67	LCMT1	-
	98.78	AOC3	Oxidoreductases		98.85	TAGAP	Rho GTPase activating proteins		95.66	BRCA2	Fanconi anemia, complementation groups
	98.76	ROCK2	Pleckstrin homology (PH) domain containing		98.84	ITGB1BP1	-		95.65	UBE3C	-
	98.75	SLC25A4	Mitochondrial nucleotide transporter subfamily		98.82	AKR1A1	Aldo-keto reductases		95.65	DUSP9	Protein tyrosine phosphatases / Class I Cys-based PTPs : MAP kinase phosphatases
	98.74	SLC29A1	SLC29 family		98.8	HGS	Zinc fingers, FYVE domain containing		95.57	GPR31	GPCR / Class A : Orphans
	98.74	KIF14	Kinesins		98.8	ATP5G1	ATPases / F-type		95.55	FABP1	Fatty acid-binding proteins
	98.74	CBS	Hydrogen sulphide synthesis		98.79	NET1	Rho guanine nucleotide exchange factors		95.49	PCDHA10	Cadherins / Protocadherins : Clustered
	98.73	GFPT1	-		98.79	SACM1L	-		95.47	CARD9	-
	98.68	TOPBP1	-		98.77	TCEB3C	-		95.22	PDS5A	-
	98.68	LHX3	Homeoboxes / LIM class		98.76	PMPCB	-		95.16	RAMP1	Receptor (G protein-coupled) activity modifying proteins
	98.66	ITGB1BP1	-		98.76	HEXIM1	-		95.11	FBXO11	Protein arginine N-methyltransferases
	98.66	CDX2	Homeoboxes / ANTP class : HOXL subclass		98.75	ERLIN1	-		95.07	GPR146	GPCR / Class A : Orphans
	98.65	ASF1A	-		98.73	RPS6KA5	MSK subfamily
	98.64	ZNF764	Zinc fingers, C2H2-type		98.73	FANCG	Fanconi anemia, complementation groups
	98.62	PPP3CC	Serine/threonine phosphatases / Protein phosphatase, catalytic subunits		98.71	KLHL21	BTB/POZ domain containing
	98.61	TMEM110	-		98.7	PHF13	Zinc fingers, PHD-type
	98.61	CRADD	-		98.69	DDB2	WD repeat domain containing
	98.61	C1ORF106	-		98.68	NDUFV1	Mitochondrial respiratory chain complex / Complex I
	98.59	SNX13	Sorting nexins		98.66	TGFA	-
	98.59	CORO1A	Coronins		98.64	ARPC5	Actin related protein 2/3 complex subunits
	98.55	PDCD2	Zinc fingers, MYND-type		98.63	CHERP	G patch domain containing
	98.55	NT5E	Adenosine turnover		98.61	TXLNA	-
	98.53	EIF3J	-		98.58	CEPT1	-
	98.51	PAX8	Paired boxes		98.56	GFOD1	-
	98.5	UROD	-		98.47	SQSTM1	-
	98.48	TMEM2	-		98.47	SMYD3	Chromatin-modifying enzymes / K-methyltransferases
	98.46	ACAT1	Lanosterol biosynthesis pathway		98.47	HDAC5	Histone deacetylases
	98.45	YARS	Aminoacyl tRNA synthetases / Class I		98.46	PSMD3	Proteasome (prosome, macropain) subunits
	98.45	KLHL21	BTB/POZ domain containing		98.45	PRKAG3	AMPK subfamily
	98.45	IL23R	IL-12 receptor family		98.41	PSMB5	Proteasome subunits
	98.42	GPR174	GPCR / Class A : Orphans		98.4	POLR1E	RNA polymerase subunits
	98.4	ZNF238	-		98.39	DGKA	EF-hand domain containing
	98.38	RPA1	-		98.34	NT5E	Adenosine turnover
	98.36	RTCD1	-		98.34	EIF4B	RNA binding motif (RRM) containing
	98.34	AKR1C3	Prostaglandin synthases		98.33	ME2	-
	98.34	ZBTB48	BTB/POZ domain containing		98.32	F11	Chymotrypsin
	98.34	PMM2	-		98.29	HTRA1	Serine peptidases / Serine peptidases
	98.32	CDCA4	-		98.29	ATF2	basic leucine zipper proteins
	98.32	BTBD3	BTB/POZ domain containing		98.26	GPX4	-
	98.31	TNFRSF10B	Tumour necrosis factor (TNF) receptor family		98.23	HIGD2A	-
	98.31	FOSL1	basic leucine zipper proteins		98.21	PTHLH	Endogenous ligands
	98.3	PHGDH	-		98.18	GNG8	-
	98.28	RNF123	RING-type (C3HC4) zinc fingers		98.17	TBK1	IKK family
	98.26	LNPEP	Aminopeptidase N		98.16	CHD8	-
	98.26	ABHD2	Abhydrolase domain containing		98.14	SIRT5	Histone deacetylases
	98.25	TIMM17B	-		98.13	SYF2	-
	98.25	ATF2	basic leucine zipper proteins		98.11	UNC13B	-
	98.21	GGA2	-		98.1	TNKS2	Ankyrin repeat domain containing
	98.16	ZNF182	Zinc fingers, C2H2-type		98.07	EXOSC4	-
	98.13	SMOC2	EF-hand domain containing		98.07	BAZ1B	Zinc fingers, PHD-type
	98.1	PRPF6	-		98.06	GLUD1	-
	98.09	TSPAN4	Tetraspanins		98.02	CCNE1	-
	98.09	STAP2	-		98.01	SMARCE1	-
	98.08	LPAR5	GPCR / Class A : Lysophospholipid receptors : Lysophosphatidic acid		98.01	ADSL	-
	98.08	BTG1	-		97.98	DICER1	-
	98.06	PRKCA	Delta subfamily		97.97	HSPB1	Heat shock proteins / HSPB
	98.02	DECR1	Short chain dehydrogenase/reductase superfamily / Classical SDR fold cluster 1		97.96	GGCX	Carboxylases
	98.01	SNW1	-		97.92	IFNG	Interferons
	97.96	KIAA0196	-		97.91	KAT6A	Histone acetyltransferases (HATs)
	97.95	ANO10	Calcium activated chloride channel		97.91	RNF138	RING-type (C3HC4) zinc fingers
	97.89	MTFR1	-		97.9	CEP55	-
	97.87	WARS2	Aminoacyl tRNA synthetases / Class I		97.88	SYT1	Synaptotagmins
	97.87	TSEN2	tRNA splicing endonuclease subunits		97.88	LIMK2	LIMK subfamily
	97.87	ERF	ETS Transcription Factors		97.87	MEOX2	Homeoboxes / ANTP class : HOXL subclass
	97.87	COG2	Components of oligomeric golgi complex		97.87	SNX13	Sorting nexins
	97.85	TSHZ3	Teashirt zinc fingers		97.84	RNF123	RING-type (C3HC4) zinc fingers
	97.83	GRB2	SH2 domain containing		97.82	NPSR1	GPCR / Class A : Neuropeptide receptors : S
	97.8	BRAP	RING-type (C3HC4) zinc fingers		97.82	LTA4H	Hydrolases
	97.8	MGST2	Glutathione S-transferases / Microsomal		97.81	ID1	Basic helix-loop-helix proteins
	97.74	SOAT1	-		97.8	ARHGEF5	Rho guanine nucleotide exchange factors
	97.57	RFC5	ATPases / AAA-type		97.78	ARFRP1	ADP-ribosylation factors
	97.56	HMGCL	-		97.76	TMEM2	-
	97.56	FBXO21	F-boxes / other		97.76	PLD4	-
	97.55	TPD52L3	-		97.76	METRN	-
	97.55	CTRB2	-		97.74	UFD1L	-
	97.53	MTERFD1	-		97.71	KLHDC2	-
	97.53	CHERP	G patch domain containing		97.66	PPAP2A	Lipid phosphate phosphatases
	97.51	RALBP1	-		97.63	RFC5	ATPases / AAA-type
	97.48	TYK2	Janus kinase (JakA) family		97.63	MERTK	Type XI RTKs: TAM (TYRO3-, AXL- and MER-TK) receptor family
	97.45	DUSP9	Protein tyrosine phosphatases / Class I Cys-based PTPs : MAP kinase phosphatases		97.62	PAK4	PAKB subfamily
	97.45	ATP6V1F	ATPases / V-type		97.61	MYCL1	-
	97.43	STUB1	Tetratricopeptide (TTC) repeat domain containing		97.6	NMUR2	GPCR / Class A : Neuromedin U receptors
	97.43	RFK	-		97.6	MRPL12	Mitochondrial ribosomal proteins / large subunits
	97.42	TRAFD1	-		97.55	STAM2	-
	97.42	MACF1	EF-hand domain containing		97.55	CCND3	-
	97.42	DNPEP	Aminopeptidase I		97.54	CMAS	-
	97.41	MAP2K5	MAPKK:STE7 family		97.54	TCEB3	-
	97.39	TWF2	Twinfilin subfamily		97.54	STAT5B	SH2 domain containing
	97.39	HMGN3	High-mobility group / Canonical		97.48	TCTA	-
	97.37	SENP6	Ulp1 endopeptidase		97.46	CLPP	ATPases / AAA-type
	97.35	GPC1	Proteoglycans / Cell Surface : Glypicans		97.45	HLA-DQB1	Immunoglobulin superfamily / C1-set domain containing
	97.34	NQO1	-		97.44	RASSF2	-
	97.32	SMAD1	SMADs		97.43	BAX	-
	97.32	SACM1L	-		97.42	PRPF6	-
	97.32	NEK7	NIMA (never in mitosis gene a)- related kinase (NEK) family		97.42	KDM1A	Histone demethylase
	97.31	MTA1	GATA zinc finger domain containing		97.4	APP	Endogenous ligands
	97.29	RPS6KA4	MSK subfamily		97.4	LMNB2	Intermediate filaments type V, lamins
	97.29	KBTBD2	BTB/POZ domain containing		97.4	SP140	Zinc fingers, PHD-type
	97.26	PPP4C	Serine/threonine phosphatases / Protein phosphatase, catalytic subunits		97.39	CFTR	ATP binding cassette transporters / subfamily C
	97.25	FAM69A	-		97.33	ACY1	-
	97.24	KISS1R	GPCR / Class A : RF amide peptide receptors		97.3	RHOBTB1	BTB/POZ domain containing
	97.23	VAPB	-		97.29	EMD	-
	97.22	ARID5B	-		97.27	MTFR1	-
	97.18	AIMP2	-		97.26	PDS5A	-
	97.13	CLASRP	-		97.26	GRWD1	WD repeat domain containing
	97.13	ANKZF1	Ankyrin repeat domain containing		97.24	ERGIC1	-
	97.12	UBE3C	-		97.24	SMG7	-
	97.08	PVR	Immunoglobulin superfamily / C2-set domain containing		97.24	EDN1	Endogenous ligands
	97.07	MST1	-		97.21	IRAK2	Interleukin-1 receptor-associated kinase (IRAK) family
	97.07	CD83	CD molecules		97.21	DCK	-
	97.05	PUS10	-		97.2	SLC11A2	SLC11 family of proton-coupled metal ion transporters
	97.04	IDH3A	-		97.18	SMC4	Structural maintenance of chromosomes proteins
	97.04	ERH	-		97.17	NUP133	-
	97.02	ZNF366	Zinc fingers, C2H2-type		97.16	STUB1	Tetratricopeptide (TTC) repeat domain containing
	96.99	IL5	Interleukins and interleukin receptors		97.16	SOCS4	SH2 domain containing
	96.98	AKAP9	A-kinase anchor proteins		97.16	ZDHHC6	Zinc fingers, DHHC-type
	96.93	FGFR1OP	-		97.14	FDX1	-
	96.91	ALDH6A1	Aldehyde dehydrogenases		97.1	TBX2	T-boxes
	96.9	RBBP6	-		97.1	APRT	-
	96.9	AKAP8L	-		97.05	PVR	Immunoglobulin superfamily / C2-set domain containing
	96.89	PPP2R4	Serine/threonine phosphatases / Protein phosphatase 2, regulatory subunits		97.04	NRAS	RAS subfamily
	96.87	GPR152	GPCR / Class A : Orphans		97.04	AHR	Basic helix-loop-helix proteins
	96.84	YWHAH	-		97.04	NUCB2	EF-hand domain containing
	96.83	POLE2	DNA polymerases		97.03	BMPR1A	Type I receptor serine/threonine kinases
	96.81	RFC2	ATPases / AAA-type		97.03	TSHZ3	Teashirt zinc fingers
	96.77	SQRDL	-		97.02	SPAG4	-
	96.72	RYK	Type XV RTKs: RYK		97.02	UBL5	-
	96.68	TIMP1	-		96.95	HDGFRP3	-
	96.67	SLC7A5	SLC7 family		96.95	CIRBP	RNA binding motif (RRM) containing
	96.63	SOCS4	SH2 domain containing		96.94	LRRC32	-
	96.63	PRR15L	-		96.94	MAP7	-
	96.62	EPB41L4B	-		96.93	GPR176	GPCR / Class A : Orphans
	96.61	PHACTR1	Phosphatase and actin regulators		96.88	TFDP1	-
	96.6	GOLT1B	-		96.87	S100A11	EF-hand domain containing
	96.58	CERS2	Homeoboxes / CERS class		96.87	MGAT1	-
	96.54	PKD1	Voltage-gated ion channels / Transient receptor potential cation channels		96.84	CLPB	Ankyrin repeat domain containing
	96.47	LSR	Immunoglobulin superfamily / Immunoglobulin-like domain containing		96.81	PLK1	Polo-like kinase (PLK) family
	96.43	MTX2	-		96.8	USF1	Basic helix-loop-helix proteins
	96.37	LMAN1	-		96.79	DDIT3	-
	96.36	SPAG4	-		96.78	CAPNS2	EF-hand domain containing
	96.32	HSPB8	Heat shock proteins / HSPB		96.75	TOX2	-
	96.29	CARD9	-		96.72	LPAR3	GPCR / Class A : Lysophospholipid receptors : Lysophosphatidic acid
	96.26	ME2	-		96.67	G6PC	-
	96.22	CTSB	Cathepsins		96.65	GNB5	WD repeat domain containing
	96.22	CDC25B	Protein tyrosine phosphatases / Class III Cys-based PTPs		96.64	ARG1	Arginase
	96.22	CALM3	EF-hand domain containing		96.59	RYK	Type XV RTKs: RYK
	96.2	FAT1	Cadherins / Cadherin-related		96.58	TIMM17B	-
	96.11	NUDCD3	-		96.56	USP20	Ubiquitin-specific peptidases
	96.09	NDUFAF4	Mitochondrial respiratory chain complex assembly factors		96.54	PTPN6	Protein tyrosine phosphatases
	96.08	RAI14	Ankyrin repeat domain containing		96.53	IMPDH1	Oxidoreductases
	96.06	MYCL1	-		96.48	FUT2	Fucosyltransferases
	96.01	HEXIM1	-		96.47	DHFR	Oxidoreductases
	95.96	SMARCE1	-		96.45	PRKCB	Alpha subfamily
	95.91	INPP5D	Inositol polyphosphate phosphatases		96.42	EPB41L4B	-
	95.89	GFOD1	-		96.41	B4GALT4	Beta 4-glycosyltransferases
	95.88	ISOC1	-		96.39	ANKZF1	Ankyrin repeat domain containing
	95.88	CEBPA	basic leucine zipper proteins		96.37	PRKCA	Delta subfamily
	95.85	VEGFB	-		96.34	COPA	Endogenous ligands
	95.85	IDH3B	-		96.33	CRAT	-
	95.83	GRK5	GRK1/3 subfamily		96.32	GM2A	-
	95.82	ZGPAT	G patch domain containing		96.22	RBM15B	RNA binding motif (RRM) containing
	95.77	SRRM1	-		96.16	HRSP12	-
	95.76	POFUT1	Fucosyltransferases		96.14	GPX2	-
	95.76	ALG5	Glycosyltransferase family 2 domain containing		96.07	GPR152	GPCR / Class A : Orphans
	95.65	PRKAA1	AMPK subfamily		96.05	IL20	Interleukins and interleukin receptors
	95.61	UBE2C	Ubiquitin-conjugating enzymes E2		96.03	UGP2	-
	95.61	EPHB2	Type XIII RTKs: Ephrin receptor family		96.01	TSLP	-
	95.58	NENF	-		96	ARPC1A	Actin related protein 2/3 complex subunits
	95.58	DHCR7	-		95.95	CNDP2	Carnosine dipeptidase
	95.54	CAPN1	EF-hand domain containing		95.94	ZNF449	Zinc fingers, C2H2-type
	95.49	SYT1	Synaptotagmins		95.87	PSMD4	Proteasome (prosome, macropain) subunits
	95.49	MXI1	Basic helix-loop-helix proteins		95.86	ARID5B	-
	95.46	TAF1B	-		95.75	SRF	-
	95.43	FABP5	Fatty acid-binding proteins		95.72	ENOPH1	-
	95.41	BAG6	-		95.62	FDFT1	Lanosterol biosynthesis pathway
	95.39	APP	Endogenous ligands		95.62	TPD52L2	-
	95.38	DYNLL1	Cytoplasmic dyneins		95.61	TANK	-
	95.37	PAK4	PAKB subfamily		95.59	ALDH6A1	Aldehyde dehydrogenases
	95.35	MCM6	-		95.57	KIAA0907	-
	95.33	IMPDH1	Oxidoreductases		95.55	EIF4A2	DEAD-boxes
	95.33	ATG4B	Aut2 peptidase		95.54	CASP2	Caspases
	95.31	DAXX	-		95.46	SLC25A4	Mitochondrial nucleotide transporter subfamily
	95.3	ZIM3	Zinc fingers, C2H2-type		95.42	AFF1	-
	95.29	FUT2	Fucosyltransferases		95.41	B3GNT1	-
	95.24	PTPN11	Protein tyrosine phosphatases		95.41	TLE3	WD repeat domain containing
	95.24	COPS5	-		95.28	HIST1H2BK	Histones / Replication-dependent
	95.23	ABCD3	ATP binding cassette transporters / subfamily D		95.22	DAP	-
	95.2	TAB2	-		95.17	BTBD3	BTB/POZ domain containing
	95.19	ENOPH1	-		95.17	ZNF238	-
	95.17	SLC16A2	SLC16 family of monocarboxylate transporters		95.14	AKR7A2	Aldo-keto reductases
	95.17	ENDOG	-		95.13	PLA2G15	-
	95.16	PAN2	Ubiquitin-specific peptidases		95.11	ABHD2	Abhydrolase domain containing
	95.15	ERAP1	Aminopeptidase N		95.08	CDKN2B	-
	95.11	ABCF2	ATP binding cassette transporters / subfamily F		95.05	ALAD	-
	95.08	ACAA1	-
	95.02	SRD5A1	-

## Sheet: Compounds + correlation
TABLE S5. Compounds that trigger transcriptional signatures that mimic the different COVID-19 signatures used in this study (similarity score >95).
Compounds positively correlated to signature				Compounds positively correlated to signature				Compounds positively correlated to signature
COVIDCS Signature (Zhou et al. (2020))				CSs Signature (Xiong et al. (2020))				CSs[sc] Signature (Liao et al. (2020))
Score	Compound	Description		Score	Compound	Description		Score	Compound	Description
99.93	prostratin	PKC activator		99.93	BX-795	IKK inhibitor		100	chaetocin	Histone lysine methyltransferase inhibitor
99.93	BX-795	IKK inhibitor		99.92	chaetocin	Histone lysine methyltransferase inhibitor		99.93	disulfiram	Aldehyde dehydrogenase inhibitor
99.89	HU-211	Glutamate receptor antagonist		99.89	prostratin	PKC activator		99.89	prostratin	PKC activator
99.89	LDN-193189	Serine/threonine kinase inhibitor		99.89	phorbol-12-myristate-13-acetate	PKC activator		99.89	menadione	Mitochondrial DNA polymerase inhibitor
99.89	phorbol-12-myristate-13-acetate	PKC activator		99.89	ingenol	PKC activator		99.89	elesclomol	Oxidative stress inducer
99.89	SU-11652	Tyrosine kinase inhibitor		99.86	lypressin	Vasopressin receptor agonist		99.86	terreic-acid	BTK inhibitor
99.89	ingenol	PKC activator		99.86	fosinopril	ACE inhibitor		99.86	ingenol	PKC activator
99.89	mefloquine	Adenosine receptor antagonist		99.84	SU-11652	Tyrosine kinase inhibitor		99.86	alvespimycin	HSP inhibitor
99.86	fenretinide	Apoptosis stimulant		99.75	nilotinib	ABL inhibitor		99.86	BX-795	IKK inhibitor
99.82	avrainvillamide-analog-1	nucleophosmin inhibitor		99.72	roxatidine	Histamine receptor antagonist		99.82	BI-78D3	JNK inhibitor
99.82	troglitazone	Insulin sensitizer		99.68	avrainvillamide-analog-1	nucleophosmin inhibitor		99.82	JTC-801	Opioid receptor antagonist
99.79	AT-9283	JAK inhibitor		99.68	physostigmine	Acetylcholinesterase inhibitor		99.82	KI-8751	VEGFR inhibitor
99.79	acitretin	Retinoid receptor agonist		99.68	pifithrin-alpha	TP53 inhibitor		99.82	BNTX	Opioid receptor antagonist
99.79	KI-8751	VEGFR inhibitor		99.65	nitazoxanide	Pyruvate ferredoxin oxidoreductase inhibitor		99.79	phorbol-12-myristate-13-acetate	PKC activator
99.75	nilotinib	ABL inhibitor		99.65	LDN-193189	Serine/threonine kinase inhibitor		99.79	QS-11	ARFGAP inhibitor
99.68	GW-1929	PPAR receptor agonist		99.58	Merck60	HDAC inhibitor		99.75	ryuvidine	Histone lysine methyltransferase inhibitor
99.65	CD-437	Retinoid receptor agonist		99.57	KI-8751	VEGFR inhibitor		99.72	BIIB021	HSP inhibitor
99.65	iodoacetic-acid	Cysteine peptidase inhibitor		99.54	amantadine	Glutamate receptor antagonist		99.68	NSC-632839	Ubiquitin specific protease inhibitor
99.58	SB-415286	Glycogen synthase kinase inhibitor		99.51	importazole	Importin-beta transport receptor inhibitor		99.68	puromycin	Protein synthesis inhibitor
99.54	L-655240	Thromboxane receptor antagonist		99.51	H-9	PKA inhibitor		99.68	geldanamycin	HSP inhibitor
99.54	amsacrine	Topoisomerase inhibitor		99.47	dexbrompheniramine	Histamine receptor antagonist		99.65	LDN-193189	Serine/threonine kinase inhibitor
99.47	bromhexine	Mucolytic agent		99.47	amsacrine	Topoisomerase inhibitor		99.58	camptothecin	Topoisomerase inhibitor
99.47	teniposide	Topoisomerase inhibitor		99.46	10H-phenothiazin-10-yl)(p-tolyl)methanone	Butyrylcholinesterase inhibitor		99.58	HSP90-inhibitor	HSP inhibitor
99.4	SB-218078	CHK inhibitor		99.44	primaquine	Antimalarial		99.47	importazole	Importin-beta transport receptor inhibitor
99.4	corynanthine	Adrenergic receptor antagonist		99.4	disulfiram	Aldehyde dehydrogenase inhibitor		99.44	16,16-dimethylprostaglandin-e2	Prostanoid receptor agonist
99.39	Merck60	HDAC inhibitor		99.4	iodoacetic-acid	Cysteine peptidase inhibitor		99.44	amsacrine	Topoisomerase inhibitor
99.37	avrainvillamide-analog-4	nucleophosmin inhibitor		99.4	menadione	Mitochondrial DNA polymerase inhibitor		99.4	7b-cis	Exportin antagonist
99.37	QS-11	ARFGAP inhibitor		99.31	gitoxigenin	ATPase inhibitor		99.4	NVP-AUY922	HSP inhibitor
99.33	alitretinoin	Retinoid receptor agonist		99.26	HDAC1-selective	HDAC inhibitor		99.4	CD-437	Retinoid receptor agonist
99.33	importazole	Importin-beta transport receptor inhibitor		99.26	helveticoside	ATPase inhibitor		99.4	iodoacetic-acid	Cysteine peptidase inhibitor
99.33	LY-83583	Guanylyl cyclase inhibitor		99.22	urapidil	Adrenergic receptor antagonist		99.37	cimaterol	Adrenergic receptor agonist
99.33	calyculin	Protein phosphatase inhibitor		99.19	RX-821002	Adrenergic receptor antagonist		99.33	SEW-2871	Lysophospholipid receptor agonist
99.3	fulvestrant	Estrogen receptor antagonist		99.15	etoposide	Topoisomerase inhibitor		99.33	SA-792709	Retinoid receptor agonist
99.28	physostigmine	Acetylcholinesterase inhibitor		99.15	cotinine	Nicotine metabolite		99.33	entinostat	HDAC inhibitor
99.26	scoulerine	Adrenergic receptor antagonist		99.15	CD-437	Retinoid receptor agonist		99.28	arachidonyl-trifluoro-methane	Cytosolic phospholipase inhibitor
99.23	calmidazolium	Calcium channel blocker		99.15	amperozide	Dopamine receptor antagonist		99.12	teniposide	Topoisomerase inhibitor
99.19	pyrvinium-pamoate	AKT inhibitor		99.12	protein-tyrosine-phosphatase-inhibitor-IV	Tyrosine phosphatase inhibitor		99.08	SSR-69071	Leukocyte elastase inhibitor
99.19	gitoxigenin	ATPase inhibitor		99.08	periplocymarin	Apoptosis stimulant		99.05	irinotecan	Topoisomerase inhibitor
99.16	SCH-79797	Proteasome inhibitor		99.06	FGIN-1-27	Inositol monophosphatase inhibitor		99.02	nilotinib	ABL inhibitor
99.15	etoposide	Topoisomerase inhibitor		99.05	HU-211	Glutamate receptor antagonist		98.98	SCH-79797	Proteasome inhibitor
99.08	forskolin	Adenylyl cyclase activator		99.01	SB-415286	Glycogen synthase kinase inhibitor		98.94	cyclopenthiazide	Thiazide diuretic
99.01	helveticoside	ATPase inhibitor		98.99	xanthohumol	ATPase inhibitor		98.87	SN-38	Topoisomerase inhibitor
98.94	chlorphensin	Muscle relaxant		98.98	l-stepholidine	Dopamine receptor antagonist		98.77	Merck60	HDAC inhibitor
98.91	ellipticine	Topoisomerase inhibitor		98.96	salbutamol	Adrenergic receptor agonist		98.73	linifanib	PDGFR receptor inhibitor
98.91	immepip	Histamine receptor agonist		98.91	JTC-801	Opioid receptor antagonist		98.73	BCI-hydrochloride	Protein phosphatase inhibitor
98.91	bisindolylmaleimide	CDK inhibitor		98.87	fulvestrant	Estrogen receptor antagonist		98.7	manumycin-a	Farnesyltransferase inhibitor
98.8	SN-38	Topoisomerase inhibitor		98.87	SN-38	Topoisomerase inhibitor		98.56	pyrrolidine-dithiocarbamate	NFkB pathway inhibitor
98.8	maackiain	Sodium/glucose cotransporter inhibitor		98.87	mefloquine	Adenosine receptor antagonist		98.56	piperlongumine	Glutathione transferase inhibitor
98.78	sarmentogenin	ATPase inhibitor		98.86	SB-218078	CHK inhibitor		98.38	mefloquine	Adenosine receptor antagonist
98.77	CAY-10415	Insulin sensitizer		98.8	tegaserod	Serotonin receptor partial agonist		98.36	YM-155	Survivin inhibitor
98.76	entinostat	HDAC inhibitor		98.77	arecaidine	Acetylcholine receptor agonist		98.33	WR-216174	PFMRK inhibitor
98.66	mocetinostat	HDAC inhibitor		98.75	sarmentogenin	ATPase inhibitor		98.29	SIB-1893	Glutamate receptor antagonist
98.66	tyrphostin-AG-527	Protein tyrosine kinase inhibitor		98.73	sphingosine	Ceramidase inhibitor		98.28	z-leu3-VS	Proteasome inhibitor
98.65	tyrphostin-AG-555	EGFR inhibitor		98.73	entinostat	HDAC inhibitor		98.27	withaferin-a	IKK inhibitor
98.63	lobaric-acid	Tyrosine phosphatase inhibitor		98.7	teniposide	Topoisomerase inhibitor		98.27	MG-132	Proteasome inhibitor
98.59	irinotecan	Topoisomerase inhibitor		98.65	glycopyrrolate	Acetylcholine receptor antagonist		98.24	MLN-2238	Proteasome inhibitor
98.59	menadione	Mitochondrial DNA polymerase inhibitor		98.62	somatostatin	Somatostatin receptor agonist		98.22	topotecan	Topoisomerase inhibitor
98.53	trap-101	Nociceptin/orphanin FQ (NOP) receptor antagonist		98.59	CAY-10585	HIF modulator		98.13	pifithrin-mu	HSP inhibitor
98.48	lypressin	Vasopressin receptor agonist		98.59	bufalin	ATPase inhibitor		98.1	PU-H71	HSP inhibitor
98.48	BVT-948	Tyrosine phosphatase inhibitor		98.59	ouabain	ATPase inhibitor		98.02	BCL2-inhibitor	BCL inhibitor
98.45	homatropine	Acetylcholine receptor antagonist		98.52	AT-9283	JAK inhibitor		97.96	thiostrepton	FOXM1 inhibitor
98.39	KU-C103443N	CDC inhibitor		98.45	ABT-751	Tubulin inhibitor		97.85	QL-XII-47	BTK inhibitor
98.39	protein-tyrosine-phosphatase-inhibitor-IV	Tyrosine phosphatase inhibitor		98.44	benidipine	Calcium channel blocker		97.78	auranofin	NFkB pathway inhibitor
98.31	periplocymarin	Apoptosis stimulant		98.41	BX-912	Pyruvate dehydrogenase kinase inhibitor		97.7	everolimus	MTOR inhibitor
98.27	olaparib	PARP inhibitor		98.38	BVT-948	Tyrosine phosphatase inhibitor		97.53	triamcinolone	Glucocorticoid receptor agonist
98.27	ouabain	ATPase inhibitor		98.34	digitoxin	ATPase inhibitor		97.21	avrainvillamide-analog-4	nucleophosmin inhibitor
98.25	cilostamide	Phosphodiesterase inhibitor		98.27	calmidazolium	Calcium channel blocker		97.18	radicicol	HSP inhibitor
98.24	pirarubicin	Topoisomerase inhibitor		98.27	cinobufagin	ATPase inhibitor		96.86	AT-9283	JAK inhibitor
98.17	AT-7519	CDK inhibitor		98.27	floxuridine	DNA synthesis inhibitor		96.83	amonafide	Topoisomerase inhibitor
98.1	tiaprofenic-acid	Cyclooxygenase inhibitor		98.24	raltegravir	HIV integrase inhibitor		96.79	SB-218078	CHK inhibitor
98.09	JAK3-inhibitor-VI	JAK inhibitor		98.24	JAK3-inhibitor-VI	JAK inhibitor		96.79	NSC-663284	CDC inhibitor
98.03	camptothecin	Topoisomerase inhibitor		98.24	manumycin-a	Farnesyltransferase inhibitor		96.76	LY-2183240	FAAH inhibitor
98.03	FGIN-1-27	Inositol monophosphatase inhibitor		98.24	proscillaridin	ATPase inhibitor		96.69	pyrvinium-pamoate	AKT inhibitor
98.02	aloisine	CDK inhibitor		98.22	avrainvillamide-analog-6	nucleophosmin inhibitor		96.62	parthenolide	NFkB pathway inhibitor
98	disulfiram	Aldehyde dehydrogenase inhibitor		98.2	NSC-632839	Ubiquitin specific protease inhibitor		96.49	avrainvillamide-analog-6	nucleophosmin inhibitor
97.94	fosinopril	ACE inhibitor		98.17	calyculin	Protein phosphatase inhibitor		96.48	penfluridol	T-type calcium channel blocker
97.92	HNHA	HDAC inhibitor		98.13	AS-601245	JNK inhibitor		96.3	avrainvillamide-analog-2	nucleophosmin inhibitor
97.92	AS-601245	JNK inhibitor		98.1	avrainvillamide-analog-4	nucleophosmin inhibitor		96.3	suloctidil	Adrenergic receptor antagonist
97.92	proscillaridin	ATPase inhibitor		98.1	bromfenac	Cyclooxygenase inhibitor		96.3	panobinostat	HDAC inhibitor
97.92	hydroquinine	Antiarrhythmic		98.08	aniracetam	Glutamate receptor agonist		96.2	acetyl-farnesyl-cysteine	Inhibitor of methylation of endogenous isoprenylated proteins
97.92	mebendazole	Tubulin inhibitor		98.07	remoxipride	Dopamine receptor antagonist		96.09	parthenolide	NFkB pathway inhibitor
97.9	bongkrek-acid	Mitochondrial ADP, ATP translocase inhibitor		98.04	4-hydroxy-2-nonenal	Cytotoxic lipid peroxidation product		95.84	cephaeline	Protein synthesis inhibitor
97.85	RO-90-7501	Beta amyloid inhibitor		98.04	BU-226	Imidazoline receptor ligand		95.77	catechin	Beta secretase inhibitor
97.82	JNJ-7706621	CDK inhibitor		98.02	BIX-01294	Histone lysine methyltransferase inhibitor		95.63	APHA-compound-8	HDAC inhibitor
97.82	ABT-751	Tubulin inhibitor		98	digoxin	ATPase inhibitor		95.24	lypressin	Vasopressin receptor agonist
97.78	YM-155	Survivin inhibitor		97.99	QL-XII-47	BTK inhibitor		95.17	apicidin	HDAC inhibitor
97.74	CO-101244	Ionotropic glutamate receptor antagonist		97.99	irinotecan	Topoisomerase inhibitor		95.08	GDC-0879	RAF inhibitor
97.74	roscovitine	CDK inhibitor		97.96	AT-7519	CDK inhibitor		95.07	EI-346-erlotinib-analog	EGFR inhibitor
97.73	digoxin	ATPase inhibitor		97.89	SB-225002	CC chemokine receptor antagonist		95.07	fenretinide	Apoptosis stimulant
97.67	BMS-345541	IKK inhibitor		97.78	BMS-345541	IKK inhibitor
97.67	cephaeline	Protein synthesis inhibitor		97.78	palbociclib	CDK inhibitor
97.6	nisoldipine	Calcium channel blocker		97.74	KU-C103443N	CDC inhibitor
97.6	cymarin	ATPase inhibitor		97.74	ioxaglic-acid	Radiopaque medium
97.57	anisomycin	DNA synthesis inhibitor		97.71	narciclasine	Coflilin signaling pathway activator
97.53	lestaurtinib	FLT3 inhibitor		97.71	vinblastine	Microtubule inhibitor
97.53	terreic-acid	BTK inhibitor		97.71	anisomycin	DNA synthesis inhibitor
97.52	glimepiride	Insulin secretagogue		97.71	digitoxigenin	ATPase inhibitor
97.49	digitoxin	ATPase inhibitor		97.67	YM-155	Survivin inhibitor
97.46	ENMD-2076	FLT3 inhibitor		97.65	terreic-acid	BTK inhibitor
97.46	SSR-69071	Leukocyte elastase inhibitor		97.65	aripiprazole	Serotonin receptor agonist
97.46	penitrem-a	Potassium channel blocker		97.63	hydroxycholesterol	LXR agonist
97.43	perhexiline	Carnitine palmitoyltransferase inhibitor		97.5	hydroquinine	Antiarrhythmic
97.42	etomoxir	Carnitine palmitoyltransferase inhibitor		97.49	chlorphensin	Muscle relaxant
97.41	chaetocin	Histone lysine methyltransferase inhibitor		97.47	cimaterol	Adrenergic receptor agonist
97.4	bufalin	ATPase inhibitor		97.44	cyproheptadine	Histamine receptor antagonist
97.36	oxyphenonium	Cholinergic receptor antagonist		97.44	HDAC3-selective	HDAC inhibitor
97.27	suloctidil	Adrenergic receptor antagonist		97.43	GR-103691	Dopamine receptor antagonist
97.26	edrophonium	Acetylcholinesterase inhibitor		97.41	raloxifene	Estrogen receptor antagonist
97.25	triptolide	RNA polymerase inhibitor		97.37	haloperidol	Dopamine receptor antagonist
97.23	topotecan	Topoisomerase inhibitor		97.36	cymarin	ATPase inhibitor
97.22	xanthohumol	ATPase inhibitor		97.36	cercosporin	Photoactivated toxin
97.17	SB-205607	Delta 1 opioid receptor agonist		97.34	gemcitabine	Ribonucleotide reductase inhibitor
97.13	narciclasine	Coflilin signaling pathway activator		97.32	cycloheximide	Protein synthesis inhibitor
97.12	alisertib	Aurora kinase inhibitor		97.25	anagrelide	Phosphodiesterase inhibitor
97.11	16,16-dimethylprostaglandin-e2	Prostanoid receptor agonist		97.23	crizotinib	ALK inhibitor
97.08	vincristine	Tubulin inhibitor		97.23	peucedanin	Apoptosis stimulant
97.06	CP-55940	Cannabinoid receptor agonist		97.22	alisertib	Aurora kinase inhibitor
97.05	obatoclax	BCL inhibitor		97.22	SCH-79797	Proteasome inhibitor
97.04	gemcitabine	Ribonucleotide reductase inhibitor		97.22	homoharringtonine	Protein synthesis inhibitor
97.03	BX-912	Pyruvate dehydrogenase kinase inhibitor		97.21	cephaeline	Protein synthesis inhibitor
97	AG-14361	PARP inhibitor		97.2	GW-405833	Cannabinoid receptor agonist
97	rhodomyrtoxin-b	sodium fluorescein uptake inhibitor		97.15	QL-X-138	MTOR inhibitor
96.96	JW-7-24-1	LCK Inhibitor		97.15	16,16-dimethylprostaglandin-e2	Prostanoid receptor agonist
96.88	CS-110266	Dopamine receptor agonist		97.11	immepip	Histamine receptor agonist
96.86	pilocarpine	Acetylcholine receptor agonist		97.08	VER-155008	HSP inhibitor
96.83	KF-38789	P-selectin inhibitor		97.01	bromhexine	Mucolytic agent
96.83	homoharringtonine	Protein synthesis inhibitor		97	obatoclax	BCL inhibitor
96.8	5-nonyloxytryptamine	Serotonin receptor agonist		97	GW-1929	PPAR receptor agonist
96.79	SA-94315	Caspase inhibitor		96.97	SB-431542	TGF beta receptor inhibitor
96.79	digoxigenin	Steroid		96.9	scoulerine	Adrenergic receptor antagonist
96.77	HDAC3-selective	HDAC inhibitor		96.89	benzo(a)pyrene	Carcinogen
96.75	diclofenac	Cyclooxygenase inhibitor		96.86	emetine	Protein synthesis inhibitor
96.72	DAPT-GSI-IX	Gamma secretase inhibitor		96.84	diflunisal	Prostanoid receptor antagonist
96.69	IKK-2-inhibitor-V	IKK inhibitor		96.8	homoveratrylamine	Dopamine analog
96.69	cycloheximide	Protein synthesis inhibitor		96.79	sulforaphane	Antineoplastic
96.69	BW-B70C	Lipoxygenase inhibitor		96.71	NSC-663284	CDC inhibitor
96.63	pargyline	Monoamine oxidase inhibitor		96.69	JW-7-24-1	LCK Inhibitor
96.48	dorsomorphin	AMPK inhibitor		96.55	XL-147	PI3K inhibitor
96.44	TCPOBOP	CAR agonist		96.53	perhexiline	Carnitine palmitoyltransferase inhibitor
96.44	QL-XII-47	BTK inhibitor		96.5	QS-11	ARFGAP inhibitor
96.41	cotinine	Nicotine metabolite		96.41	niclosamide	DNA replication inhibitor
96.41	rosiglitazone	Insulin sensitizer		96.4	MLN-2238	Proteasome inhibitor
96.3	penfluridol	T-type calcium channel blocker		96.37	pyrvinium-pamoate	AKT inhibitor
96.22	aripiprazole	Serotonin receptor agonist		96.34	NAS-181	Serotonin receptor antagonist
96.21	barasertib	Aurora kinase inhibitor		96.29	SA-792541	CDC inhibitor
96.18	thiazolopyrimidine	CDC inhibitor		96.12	parbendazole	Tubulin inhibitor
96.12	tegaserod	Serotonin receptor partial agonist		96.08	penfluridol	T-type calcium channel blocker
96.11	metronidazole	DNA inhibitor		96.05	APHA-compound-8	HDAC inhibitor
96.04	BD-1008	Sigma receptor antagonist		96.03	hexamethyleneamiloride	Sodium/hydrogen antiport inhibitor
96	glycopyrrolate	Acetylcholine receptor antagonist		95.99	icosapent	Platelet aggregation inhibitor
95.99	ZK-164015	Estrogen receptor antagonist		95.98	lestaurtinib	FLT3 inhibitor
95.95	JTC-801	Opioid receptor antagonist		95.97	WR-216174	PFMRK inhibitor
95.92	strophanthidin	ATPase inhibitor		95.91	digoxigenin	Steroid
95.9	vindesine	Tubulin inhibitor		95.79	tyrphostin-47	EGFR inhibitor
95.89	metrizamide	Radiopaque medium		95.72	finasteride	5-alpha reductase inhibitor
95.88	XL-147	PI3K inhibitor		95.7	strophanthidin	ATPase inhibitor
95.84	cytarabine	Ribonucleotide reductase inhibitor		95.66	verrucarin-a	Protein synthesis inhibitor
95.84	PHA-665752	c-Met inhibitor		95.65	ruxolitinib	JAK inhibitor
95.84	podophyllotoxin	Microtubule inhibitor		95.62	tetrindole	Monoamine oxidase inhibitor
95.75	emetine	Protein synthesis inhibitor		95.6	penicillic-acid	other antibiotic
95.74	methylene-blue	Guanylyl cyclase inhibitor		95.6	mebendazole	Tubulin inhibitor
95.68	acamprosate	Glutamate receptor antagonist		95.58	KU-C103871	GSP agonist
95.67	heliomycin	ATP synthase inhibitor		95.57	mocetinostat	HDAC inhibitor
95.59	digitoxigenin	ATPase inhibitor		95.48	penitrem-a	Potassium channel blocker
95.58	salbutamol	Adrenergic receptor agonist		95.42	HNHA	HDAC inhibitor
95.57	somatostatin	Somatostatin receptor agonist		95.41	clofarabine	Ribonucleoside reductase inhibitor
95.57	10H-phenothiazin-10-yl)(p-tolyl)methanone	Butyrylcholinesterase inhibitor		95.35	heliomycin	ATP synthase inhibitor
95.55	ZG-10	JNK inhibitor		95.31	lavendustin-c	EGFR inhibitor
95.49	indole	aryl hydrocarbon receptor agonist		95.28	7b-cis	Exportin antagonist
95.42	SID-26681509	Cathepsin inhibitor		95.27	tyrphostin-A9	Protein tyrosine kinase inhibitor
95.36	pifithrin-alpha	TP53 inhibitor		95.23	tyrphostin-AG-18	EGFR inhibitor
95.35	targinine	Nitric oxide synthase inhibitor		95.19	bongkrek-acid	Mitochondrial ADP, ATP translocase inhibitor
95.35	YC-1	Guanylyl cyclase activator		95.14	rhodomyrtoxin-b	sodium fluorescein uptake inhibitor
95.35	MY-5445	Phosphodiesterase inhibitor		95.08	vanoxerine	Dopamine uptake inhibitor
95.35	PSB-36	Adenosine receptor antagonist		95.03	SSR-69071	Leukocyte elastase inhibitor
95.31	tamibarotene	Retinoid receptor agonist
95.31	tretinoin	Retinoid receptor agonist
95.25	clotrimazole	Cytochrome P450 inhibitor
95.25	haloperidol	Dopamine receptor antagonist
95.23	cimaterol	Adrenergic receptor agonist
95.15	ritodrine	Adrenergic receptor agonist
95.13	AKT-inhibitor-IV	AKT inhibitor
95.09	ethylestrenol	Progesterone receptor agonist
95.03	15-delta-prostaglandin-j2	PPAR receptor agonist

## Sheet: Compounds - correlation
	TABLE S8. Compounds that trigger transcriptional signatures opposite to the different COVID-19 signatures used in this study (similarity score <-95).
	Compounds negatively correlating to signature				Compounds negatively correlating to signature				Compounds negatively correlating to signature
	COVIDCS Signature (Zhou et al. (2020))				CSs Signature (Xiong et al. (2020))				CSs[sc] Signature (Liao et al. (2020))
	Score	Compound	Description		Score	Compound	Description		Score	Compound	Description
	-99.93	lysylphenylalanyl-tyrosine	Heparin activation inhibitor		-99.93	treprostinil	Prostacyclin analog		-99.93	fenoldopam	Dopamine receptor agonist
	-99.93	phensuximide	Succinimide antiepileptic		-99.93	ZM-323881	VEGFR inhibitor		-99.89	4,5-dianilinophthalimide	EGFR inhibitor
	-99.93	FG-7142	GABA benzodiazepine site receptor inverse agonist		-99.93	phensuximide	Succinimide antiepileptic		-99.86	VU-0415374-1	Glutamate receptor modulator
	-99.82	triacsin-c	Adrenergic receptor antagonist		-99.89	17-hydroxyprogesterone-caproate	progesterone receptor agonist		-99.82	bepridil	Calcium channel blocker
	-99.79	warfarin	Vitamin K antagonist		-99.89	bupropion	Dopamine uptake inhibitor		-99.82	indirubin	CDK inhibitor
	-99.75	latrepirdine	Glutamate receptor antagonist		-99.89	TPCA-1	IKK inhibitor		-99.82	metyrapone	Cytochrome P450 inhibitor
	-99.72	palonosetron	Serotonin receptor antagonist		-99.68	tipifarnib	Farnesyltransferase inhibitor		-99.82	nitrocaramiphen	Cholinergic receptor antagonist
	-99.72	levetiracetam	Calcium channel blocker		-99.61	warfarin	Vitamin K antagonist		-99.76	estriol	Estrogen receptor agonist
	-99.68	TPCA-1	IKK inhibitor		-99.61	triacsin-c	Adrenergic receptor antagonist		-99.75	ML-7	Myosin light chain kinase inhibitor
	-99.65	QL-XI-92	DDR1 inhibitor		-99.54	ZK-756326	CC chemokine receptor ligand		-99.72	daphnetin	Protein kinase inhibitor
	-99.58	7,8-dihydro-L-biopterin	Dihydroneopterin aldolase inhibitor		-99.33	mepyramine	Histamine receptor antagonist		-99.65	danoprevir	HCV inhibitor
	-99.47	GW-843682X	PLK inhibitor		-99.3	methoxsalen	DNA synthesis inhibitor		-99.65	orciprenaline	Adrenergic receptor agonist
	-99.44	tolcapone	Catechol O methyltransferase inhibitor		-99.19	niacin	NAD precursor with lipid lowering effects		-99.65	PKCbeta-inhibitor	PKC inhibitor
	-99.42	treprostinil	Prostacyclin analog		-99.19	ketanserin	Serotonin receptor antagonist		-99.61	doxycycline	Bacterial 30S ribosomal subunit inhibitor
	-99.4	procyclidine	Acetylcholine receptor antagonist		-99.17	verapamil	Calcium channel blocker		-99.61	latrepirdine	Glutamate receptor antagonist
	-99.37	OM-137	Aurora kinase inhibitor		-99.15	atorvastatin	HMGCR inhibitor		-99.58	7,8-dihydro-L-biopterin	Dihydroneopterin aldolase inhibitor
	-99.37	auraptene	Nitric oxide production inhibitor		-99.05	avrainvillamide-analog-5	nucleophosmin inhibitor		-99.58	bucladesine	Adenosine receptor agonist
	-99.32	ornidazole	Antiprotozoal		-98.87	rimexolone	Glucocorticoid receptor agonist		-99.58	ergocryptine	Dopamine agonist
	-99.3	kynuramine	Aryl hydrocarbon receptor activator		-98.77	felbamate	Glutamate receptor antagonist		-99.4	nifurtimox	DNA inhibitor
	-99.26	ZM-323881	VEGFR inhibitor		-98.7	GANT-58	GLI antagonist		-99.4	SB-202190	p38 MAPK inhibitor
	-99.22	alprazolam	Benzodiazepine receptor agonist		-98.7	SB-202190	p38 MAPK inhibitor		-99.4	vemurafenib	RAF inhibitor
	-99.15	pyrazolanthrone	JNK inhibitor		-98.66	desoxypeganine	Acetylcholinesterase inhibitor		-99.37	pyrazinamide	Fatty acid synthase inhibitor
	-99.12	fatostatin	SREBP inhibitor		-98.66	benzoxiquine	Anti-infective		-99.35	IRL-2500	Endothelin receptor antagonist
	-99.08	guaifenesin	Expectorant		-98.63	ipsapirone	Serotonin receptor agonist		-99.35	lobendazole	Anthelmintic
	-99.08	benzoxiquine	Anti-infective		-98.63	selumetinib	MEK inhibitor		-99.35	phenformin	AMPK activator
	-99.01	NVP-AUY922	HSP inhibitor		-98.58	pirlindole	Monoamine oxidase inhibitor		-99.33	alrestatin	Aldose reductase inhibitor
	-98.98	PD-0325901	MEK inhibitor		-98.54	eicosatetraynoic-acid	Cyclooxygenase inhibitor		-99.33	phylloquinone	Vitamin K
	-98.91	SB-590885	RAF inhibitor		-98.45	ascorbyl-palmitate	antioxidant		-99.26	alpha-linolenic-acid	Omega 3 fatty acid stimulant
	-98.91	MDM2-inhibitor	MDM inhibitor		-98.44	latrepirdine	Glutamate receptor antagonist		-99.26	harpagoside	Acetylcholinesterase inhibitor
	-98.81	ascorbyl-palmitate	antioxidant		-98.41	RHO-kinase-inhibitor-III[rockout]	Rho associated kinase inhibitor		-99.26	icariin	Phosphodiesterase inhibitor
	-98.74	entecavir	Reverse transcriptase inhibitor		-98.27	MK-5108	Aurora kinase inhibitor		-99.24	lapatinib	EGFR inhibitor
	-98.72	bicuculline	GABA receptor antagonist		-98.27	betamethasone	Glucocorticoid receptor agonist		-99.21	nifedipine	Calcium channel blocker
	-98.72	actarit	Interleukin receptor agonist		-98.2	anpirtoline	Serotonin receptor agonist		-99.15	chloroquine	Antimalarial
	-98.7	JAK3-inhibitor-I	JAK inhibitor		-98.1	doxycycline	Bacterial 30S ribosomal subunit inhibitor		-99.08	L-BSO	Glutathione transferase inhibitor
	-98.7	niridazole	Phosphofructokinase inhibitor		-98.06	VU-0413807-2	Calcium channel blocker		-99.05	AS-703026	MEK inhibitor
	-98.69	XMD-885	Leucine rich repeat kinase inhibitor		-98.02	dilazep	Adenosine reuptake inhibitor		-99.05	RO-19-4605	GABA benzodiazepine site receptor inverse agonist
	-98.52	coumarin	Vitamin K antagonist		-98	milrinone	Phosphodiesterase inhibitor		-98.98	acarbose	Glucosidase inhibitor
	-98.52	carbamazepine	Carboxamide antiepileptic		-97.92	memantine	Glutamate receptor antagonist		-98.94	altretamine	DNA synthesis inhibitor
	-98.5	avrainvillamide-analog-5	nucleophosmin inhibitor		-97.9	SKF-86002	p38 MAPK inhibitor		-98.91	AS-605240	PI3K inhibitor
	-98.49	heraclenol	Vitamin K antagonist		-97.85	XMD-892	MAP kinase inhibitor		-98.91	CL-218872	GABA receptor agonist
	-98.45	tyrphostin-AG-82	EGFR inhibitor		-97.8	guaifenesin	Expectorant		-98.91	taurodeoxycholic-acid	Bile acid
	-98.34	trimethobenzamide	Histamine receptor antagonist		-97.71	repaglinide	Insulin secretagogue		-98.87	irbesartan	Angiotensin receptor antagonist
	-98.31	AS-703026	MEK inhibitor		-97.67	palonosetron	Serotonin receptor antagonist		-98.84	rucaparib	PARP inhibitor
	-98.29	niacin	NAD precursor with lipid lowering effects		-97.67	IWR-1-ENDO	PARP inhibitor		-98.82	nevirapine	Reverse transcriptase inhibitor
	-98.25	XMD-892	MAP kinase inhibitor		-97.64	dexamethasone	Glucocorticoid receptor agonist		-98.8	selumetinib	MEK inhibitor
	-98.17	oxybutynin	Acetylcholine receptor antagonist		-97.33	SB-590885	RAF inhibitor		-98.73	itopride	Dopamine receptor antagonist
	-98.13	PU-H71	HSP inhibitor		-97.33	ramipril	ACE inhibitor		-98.7	actarit	Interleukin receptor agonist
	-98.13	PKCbeta-inhibitor	PKC inhibitor		-97.33	thalidomide	TNF production inhibitor		-98.66	fillalbin	Increases arterial blood pressure
	-98.1	memantine	Glutamate receptor antagonist		-97.31	temozolomide	DNA alkylating agent		-98.63	z-prolyl-prolinal	Prolyl endopeptidase inhibitor
	-98.1	cycloserine	Bacterial cell wall synthesis inhibitor		-97.3	meclofenamic-acid	Cyclooxygenase inhibitor		-98.59	myricetin	Androgen receptor agonist
	-98.1	CAY-10577	Casein kinase inhibitor		-97.22	KUC103904N	-666		-98.56	PD-0325901	MEK inhibitor
	-98.01	esmolol	Adrenergic receptor antagonist		-97.22	PD-173074	FGFR inhibitor		-98.47	eicosatetraynoic-acid	Cyclooxygenase inhibitor
	-97.98	sinensetin	Cyclooxygenase inhibitor		-97.21	nilutamide	Androgen receptor antagonist		-98.47	JAK3-inhibitor-I	JAK inhibitor
	-97.95	LY-303511	Casein kinase inhibitor		-97.12	FR-122047	Cyclooxygenase inhibitor		-98.44	necrostatin-1	RIPK inhibitor
	-97.89	L-BSO	Glutathione transferase inhibitor		-97.08	carbetocin	Oxytocin receptor agonist		-98.31	paclitaxel	Tubulin inhibitor
	-97.89	hydrocortisone	Glucocorticoid receptor agonist		-97.01	QL-XI-92	DDR1 inhibitor		-98.27	1-phenylbiguanide	Serotonin receptor agonist
	-97.85	TG-101348	FLT3 inhibitor		-97	hydrocortisone	Glucocorticoid receptor agonist		-98.27	vinpocetine	Phosphodiesterase inhibitor
	-97.79	PCA-4248	Platelet activating factor receptor antagonist		-96.97	terazosin	Adrenergic receptor antagonist		-98.24	AZD-7762	CHK inhibitor
	-97.71	talampicillin	Bacterial cell wall synthesis inhibitor		-96.94	deferiprone	Chelating agent		-98.24	cefpodoxime	Bacterial cell wall synthesis inhibitor
	-97.71	fluocinolone	Glucocorticoid receptor agonist		-96.83	beta-CCP	Indoleamine 2,3-dioxygenase inhibitor		-98.24	dasatinib	BCR-ABL kinase inhibitor
	-97.64	fluocinonide	Glucocorticoid receptor agonist		-96.83	fluticasone	Glucocorticoid receptor agonist		-98.24	GDC-0941	PI3K inhibitor
	-97.62	WT-171	HDAC inhibitor		-96.83	vemurafenib	RAF inhibitor		-98.24	PIK-75	DNA protein kinase inhibitor
	-97.61	TCS-359	FLT3 inhibitor		-96.79	estropipate	Estrogen receptor agonist		-98.24	WAY-629	Serotonin receptor agonist
	-97.6	ALW-II-38-3	Ephrin inhibitor		-96.74	OM-137	Aurora kinase inhibitor		-98.2	A-443644	AKT inhibitor
	-97.6	PD-173074	FGFR inhibitor		-96.74	GW-441756	Growth factor receptor inhibitor		-98.13	torin-1	MTOR inhibitor
	-97.6	RHO-kinase-inhibitor-III[rockout]	Rho associated kinase inhibitor		-96.53	mevastatin	HMGCR inhibitor		-98.01	phenazone	Cyclooxygenase inhibitor
	-97.53	mometasone	Glucocorticoid receptor agonist		-96.35	GSK-461364	PLK inhibitor		-97.99	SQ-29548	Thromboxane receptor antagonist
	-97.53	phenacetin	Cyclooxygenase inhibitor		-96.33	Cyclo-[Arg-Gly-Asp-D-Phe-Val]	integrin antagonist		-97.96	JNK-9L	JNK inhibitor
	-97.53	carbetocin	Oxytocin receptor agonist		-96.32	pyrazolanthrone	JNK inhibitor		-97.92	pyridine-2-aldoxime	Acetylcholinesterase inhibitor
	-97.48	desoxypeganine	Acetylcholinesterase inhibitor		-96.3	lapatinib	EGFR inhibitor		-97.91	H-8	PKA inhibitor
	-97.48	betamethasone	Glucocorticoid receptor agonist		-96.18	solanine	Acetylcholinesterase inhibitor		-97.89	PD-123319	Angiotensin receptor antagonist
	-97.46	dantron	Laxative		-96.16	dexamethasone	Glucocorticoid receptor agonist		-97.89	ZG-10	JNK inhibitor
	-97.39	BMS-641988	Androgen receptor antagonist		-96.12	acepromazine	Dopamine receptor antagonist		-97.87	PLX-4720	RAF inhibitor
	-97.36	dilazep	Adenosine reuptake inhibitor		-96.12	tubacin	HDAC inhibitor		-97.85	FR-180204	-666
	-97.29	BAY-K8644	Calcium channel activator		-96.04	VEGF-receptor-2-kinase-inhibitor-IV	VEGFR inhibitor		-97.85	raltegravir	HIV integrase inhibitor
	-97.21	beclometasone	Glucocorticoid receptor agonist		-95.97	desoxycortone	Mineralocorticoid receptor agonist		-97.81	practolol	Adrenergic receptor antagonist
	-97.18	tubacin	HDAC inhibitor		-95.91	androstenol	GABA receptor modulator		-97.78	phensuximide	Succinimide antiepileptic
	-97.18	dexamethasone	Glucocorticoid receptor agonist		-95.88	U-99194	Dopamine receptor antagonist		-97.78	SKF-77434	Dopamine receptor agonist
	-97.15	L-690330	Inositol monophosphatase inhibitor		-95.82	VU-0365114-2	M5 modulator		-97.74	PSB-11	Adenosine receptor antagonist
	-97.05	PI-828	PI3K inhibitor		-95.7	desoximetasone	Glucocorticoid receptor agonist		-97.7	gavestinel	Glutamate receptor antagonist
	-97.02	PNU-120596	Acetylcholine receptor agonist		-95.56	tocainide	Sodium channel blocker		-97.58	diethylstilbestrol	Estrogen receptor agonist
	-97	pinocembrin	CYP1B1 inhibitor		-95.56	PD-0325901	MEK inhibitor		-97.5	AZD-8055	MTOR inhibitor
	-96.96	IWR-1-ENDO	PARP inhibitor		-95.49	XMD-1150	Leucine rich repeat kinase inhibitor		-97.5	ER-27319	Mediator release inhibitor
	-96.9	elvitegravir	HIV integrase inhibitor		-95.43	naltrindole	Opioid receptor antagonist		-97.47	fasudil	Rho associated kinase inhibitor
	-96.84	O-1918	Cannabinoid receptor antagonist		-95.35	beclometasone	Glucocorticoid receptor agonist		-97.46	cefazolin	Bacterial cell wall synthesis inhibitor
	-96.83	estropipate	Estrogen receptor agonist		-95.35	alpha-linolenic-acid	Omega 3 fatty acid stimulant		-97.46	tipifarnib	Farnesyltransferase inhibitor
	-96.81	phenformin	AMPK activator		-95.33	GSK-429286A	Rho associated kinase inhibitor		-97.41	heraclenol	Vitamin K antagonist
	-96.79	fluticasone	Glucocorticoid receptor agonist		-95.31	PTB1	AMPK activator		-97.41	nomifensine	Dopamine uptake inhibitor
	-96.77	ML-7	Myosin light chain kinase inhibitor		-95.26	denbufylline	Phosphodiesterase inhibitor		-97.36	estropipate	Estrogen receptor agonist
	-96.72	selumetinib	MEK inhibitor		-95.24	L-690330	Inositol monophosphatase inhibitor		-97.36	farnesol	FXR agonist
	-96.72	tivozanib	VEGFR inhibitor		-95.18	WH-4023	SRC inhibitor		-97.36	GW-311616	Leukocyte elastase inhibitor
	-96.64	propafenone	Antiarrhythmic		-95.14	BRD-K41143549	Glutamate receptor antagonist		-97.32	entecavir	Reverse transcriptase inhibitor
	-96.54	hydrocortisone	Glucocorticoid receptor agonist		-95.07	CO-101244	Ionotropic glutamate receptor antagonist		-97.31	mesna	Antioxidant
	-96.48	vemurafenib	RAF inhibitor						-97.21	cephalosporanic-acid	Bacterial cell wall synthesis inhibitor
	-96.32	WH-4023	SRC inhibitor						-97.16	mesoridazine	Dopamine receptor antagonist
	-96.26	methylprednisolone	Glucocorticoid receptor agonist						-97.1	ciclacillin	Bacterial cell wall synthesis inhibitor
	-96.17	n-(3-acetamidophenyl)-3-chlorobenzamide	Glutamate receptor antagonist						-97	nitrendipine	Calcium channel blocker
	-96.1	PD-184352	MEK inhibitor						-96.99	PNU-22394	Serotonin receptor agonist
	-96.1	EMF-BCA1-64	Caspase inhibitor						-96.99	TPCA-1	IKK inhibitor
	-96.09	tacrolimus	Calcineurin inhibitor						-96.97	dihydrodeoxygedunin	Growth factor receptor activator
	-96.02	LY-320135	Cannabinoid receptor antagonist						-96.97	kenpaullone	CDK inhibitor
	-95.98	tyrphostin-AG-1478	EGFR inhibitor						-96.92	PD-184352	MEK inhibitor
	-95.89	albendazole	Anthelmintic						-96.9	alvocidib	CDK inhibitor
	-95.79	naphazoline	Adrenergic receptor agonist						-96.9	idarubicin	Topoisomerase inhibitor
	-95.77	metyrapone	Cytochrome P450 inhibitor						-96.9	picrotoxin	GABA receptor antagonist
	-95.76	zuclopenthixol	Dopamine receptor antagonist						-96.86	desoxypeganine	Acetylcholinesterase inhibitor
	-95.54	rimexolone	Glucocorticoid receptor agonist						-96.81	RHO-kinase-inhibitor-III[rockout]	Rho associated kinase inhibitor
	-95.5	tyrphostin-AG-112	Protein tyrosine kinase inhibitor						-96.76	prestwick-559	Dopamine receptor agonist
	-95.5	naproxol	Anti-inflammatory						-96.75	forskolin	Adenylyl cyclase activator
	-95.35	XMD-1150	Leucine rich repeat kinase inhibitor						-96.72	NU-7441	DNA dependent protein kinase inhibitor
	-95.32	fluocinonide	Glucocorticoid receptor agonist						-96.7	acamprosate	Glutamate receptor antagonist
	-95.3	WAY-629	Serotonin receptor agonist						-96.7	PI-828	PI3K inhibitor
	-95.28	geldanamycin	HSP inhibitor						-96.51	acetyl-geranygeranyl-cysteine	Inhibitor of methyl esterification of geranylgeranylated proteins
	-95.2	ritanserin	Serotonin receptor antagonist						-96.47	cromoglicic-acid	Immunosuppressant
	-95.07	doxapram	Potassium channel blocker						-96.43	nabumetone	Cyclooxygenase inhibitor
	-95.01	tomelukast	Leukotriene receptor antagonist						-96.4	SCH-28080	ATPase inhibitor
									-96.26	GSK-3-inhibitor-II	PKC inhibitor
									-96.22	oleylethanolamide	Cannabinoid receptor agonist
									-96.22	SB-590885	RAF inhibitor
									-96.16	dactolisib	MTOR inhibitor
									-96.09	alpha-estradiol	Estrogen receptor agonist
									-96.09	altizide	Thiazide diuretic
									-96.05	benazepril	ACE inhibitor
									-96.05	triptolide	RNA polymerase inhibitor
									-95.99	RO-60-0175	Serotonin receptor agonist
									-95.98	betamethasone	Glucocorticoid receptor agonist
									-95.98	prothionamide	Mycobacterium tuberculosis enoyl-[acyl-carrier-protein] reductase [NADH] (inhA) inhibitor
									-95.97	carprofen	Cyclooxygenase inhibitor
									-95.91	CAY-10577	Casein kinase inhibitor
									-95.86	levetiracetam	Calcium channel blocker
									-95.82	daunorubicin	RNA synthesis inhibitor
									-95.76	PD-198306	MAP kinase inhibitor
									-95.75	naftopidil	Adrenergic receptor antagonist
									-95.71	IKK-2-inhibitor	IKK inhibitor
									-95.68	bisindolylmaleimide-ix	CDK inhibitor
									-95.56	bromocriptine	Dopamine receptor agonist
									-95.55	moxifloxacin	Bacterial DNA gyrase inhibitor
									-95.48	cefoxitin	Bacterial cell wall synthesis inhibitor
									-95.46	RS-45041-190	Imidazoline receptor agonist
									-95.42	GSK-3-inhibitor-IX	Glycogen synthase kinase inhibitor
									-95.41	evoxine	Furoquinoline alkaloid
									-95.33	cerivastatin	HMGCR inhibitor
									-95.31	MAZ-51	VEGFR inhibitor
									-95.22	pirlindole	Monoamine oxidase inhibitor
									-95.2	proadifen	Nitric oxide synthase inhibitor
									-95.19	damnacanthal	SRC inhibitor
									-95.18	PETCM	Caspase activator
									-95.11	UNC-0321	Histone lysine methyltransferase inhibitor
									-95.08	kynuramine	Aryl hydrocarbon receptor activator
									-95	ZSTK-474	PI3K inhibitor

## Sheet: Medical-drugs + correlation
TABLE S6. Medically-approved compounds that trigger transcriptional signatures that mimic the different COVID-19 signatures used in this study (similarity score >95).
Medically-Approved Compounds positively correlated to signature				Medically-Approved Compounds positively correlated to signature				Medically-Approved Compounds positively correlated to signature
COVIDCS Signature (Zhou et al. (2020))				CSs Signature (Xiong et al. (2020))				CSs[sc] Signature (Liao et al. (2020))
Score	Compound	Description		Score	Compound	Description		Score	Compound	Description
99.89	mefloquine	Adenosine receptor antagonist		99.86	fosinopril	ACE inhibitor		99.93	disulfiram	Aldehyde dehydrogenase inhibitor
99.79	acitretin	Retinoid receptor agonist		99.75	nilotinib	ABL inhibitor		99.89	menadione	Mitochondrial DNA polymerase inhibitor
99.75	nilotinib	ABL inhibitor		99.68	physostigmine	Acetylcholinesterase inhibitor		99.44	amsacrine	Topoisomerase inhibitor
99.54	amsacrine	Topoisomerase inhibitor		99.65	nitazoxanide	Pyruvate ferredoxin oxidoreductase inhibitor		99.12	teniposide	Topoisomerase inhibitor
99.47	bromhexine	Mucolytic agent		99.54	amantadine	Glutamate receptor antagonist		99.05	irinotecan	Topoisomerase inhibitor
99.47	teniposide	Topoisomerase inhibitor		99.47	amsacrine	Topoisomerase inhibitor		99.02	nilotinib	ABL inhibitor
99.3	fulvestrant	Estrogen receptor antagonist		99.44	primaquine	Antimalarial		98.94	cyclopenthiazide	Thiazide diuretic
99.28	physostigmine	Acetylcholinesterase inhibitor		99.4	disulfiram	Aldehyde dehydrogenase inhibitor		98.87	SN-38	Topoisomerase inhibitor
99.19	pyrvinium-pamoate	AKT inhibitor		99.4	menadione	Mitochondrial DNA polymerase inhibitor		98.38	mefloquine	Adenosine receptor antagonist
99.15	etoposide	Topoisomerase inhibitor		99.22	urapidil	Adrenergic receptor antagonist		98.22	topotecan	Topoisomerase inhibitor
99.08	forskolin	Adenylyl cyclase activator		99.15	etoposide	Topoisomerase inhibitor		97.96	thiostrepton	FOXM1 inhibitor
98.8	SN-38	Topoisomerase inhibitor		99.15	amperozide	Dopamine receptor antagonist		97.78	auranofin	NFkB pathway inhibitor
98.59	irinotecan	Topoisomerase inhibitor		98.87	SN-38	Topoisomerase inhibitor		97.7	everolimus	MTOR inhibitor
98.59	menadione	Mitochondrial DNA polymerase inhibitor		98.87	mefloquine	Adenosine receptor antagonist		97.53	triamcinolone	Glucocorticoid receptor agonist
98.45	homatropine	Acetylcholine receptor antagonist		98.87	fulvestrant	Estrogen receptor antagonist		96.69	pyrvinium-pamoate	AKT inhibitor
98.27	olaparib	PARP inhibitor		98.77	arecaidine	Acetylcholine receptor agonist		96.62	parthenolide	NFkB pathway inhibitor
98.27	ouabain	ATPase inhibitor		98.7	teniposide	Topoisomerase inhibitor		96.48	penfluridol	T-type calcium channel blocker
98.24	pirarubicin	Topoisomerase inhibitor		98.65	glycopyrrolate	Acetylcholine receptor antagonist		96.3	panobinostat	HDAC inhibitor
98.1	tiaprofenic-acid	Cyclooxygenase inhibitor		98.59	ouabain	ATPase inhibitor		96.2	acetyl-farnesyl-cysteine	Inhibitor of methylation of endogenous isoprenylated proteins
98	disulfiram	Aldehyde dehydrogenase inhibitor		98.44	benidipine	Calcium channel blocker		96.09	parthenolide	NFkB pathway inhibitor
97.94	fosinopril	ACE inhibitor		98.34	digitoxin	ATPase inhibitor
97.92	mebendazole	Tubulin inhibitor		98.27	floxuridine	DNA synthesis inhibitor
97.73	digoxin	ATPase inhibitor		98.24	raltegravir	HIV integrase inhibitor
97.6	nisoldipine	Calcium channel blocker		98.08	aniracetam	Glutamate receptor agonist
97.52	glimepiride	Insulin secretagogue		98	digoxin	ATPase inhibitor
97.49	digitoxin	ATPase inhibitor		97.99	irinotecan	Topoisomerase inhibitor
97.43	perhexiline	Carnitine palmitoyltransferase inhibitor		97.78	palbociclib	CDK inhibitor
97.36	oxyphenonium	Cholinergic receptor antagonist		97.74	ioxaglic-acid	Radiopaque medium
97.26	edrophonium	Acetylcholinesterase inhibitor		97.71	vinblastine	Microtubule inhibitor
97.23	topotecan	Topoisomerase inhibitor		97.65	aripiprazole	Serotonin receptor agonist
97.08	vincristine	Tubulin inhibitor		97.44	cyproheptadine	Histamine receptor antagonist
97.04	gemcitabine	Ribonucleotide reductase inhibitor		97.41	raloxifene	Estrogen receptor antagonist
96.86	pilocarpine	Acetylcholine receptor agonist		97.37	haloperidol	Dopamine receptor antagonist
96.83	homoharringtonine	Protein synthesis inhibitor		97.34	gemcitabine	Ribonucleotide reductase inhibitor
96.75	diclofenac	Cyclooxygenase inhibitor		97.25	anagrelide	Phosphodiesterase inhibitor
96.63	pargyline	Monoamine oxidase inhibitor		97.23	crizotinib	ALK inhibitor
96.3	penfluridol	T-type calcium channel blocker		97.22	homoharringtonine	Protein synthesis inhibitor
96.22	aripiprazole	Serotonin receptor agonist		97.01	bromhexine	Mucolytic agent
96.11	metronidazole	DNA inhibitor		96.84	diflunisal	Prostanoid receptor antagonist
96	glycopyrrolate	Acetylcholine receptor antagonist		96.53	perhexiline	Carnitine palmitoyltransferase inhibitor
95.89	metrizamide	Radiopaque medium		96.41	niclosamide	DNA replication inhibitor
95.84	cytarabine	Ribonucleotide reductase inhibitor		96.37	pyrvinium-pamoate	AKT inhibitor
95.84	podophyllotoxin	Microtubule inhibitor		96.08	penfluridol	T-type calcium channel blocker
95.74	methylene-blue	Guanylyl cyclase inhibitor		95.99	icosapent	Platelet aggregation inhibitor
95.68	acamprosate	Glutamate receptor antagonist		95.72	finasteride	5-alpha reductase inhibitor
95.31	tamibarotene	Retinoid receptor agonist		95.65	ruxolitinib	JAK inhibitor
95.31	tretinoin	Retinoid receptor agonist		95.6	mebendazole	Tubulin inhibitor
95.25	clotrimazole	Cytochrome P450 inhibitor		95.41	clofarabine	Ribonucleoside reductase inhibitor
95.25	haloperidol	Dopamine receptor antagonist
95.15	ritodrine	Adrenergic receptor agonist

## Sheet: Medical-drugs - correlation
	TABLE S9. Medically-approved compounds that trigger transcriptional signatures opposite to the different COVID-19 signatures used in this study (similarity score <-95).
	Medically-Approved Compounds negatively correlating to signature				Medically-Approved Compounds negatively correlating to signature				Medically-Approved Compounds negatively correlating to signature
	COVIDCS Signature (Zhou et al. (2020))				CSs Signature (Xiong et al. (2020))				CSs[sc] Signature (Liao et al. (2020))
	Score	Compound	Description		Score	Compound	Description		Score	Compound	Description
	-99.93	phensuximide	Succinimide antiepileptic		-99.93	phensuximide	Succinimide antiepileptic		-99.93	fenoldopam	Dopamine receptor agonist
	-99.79	warfarin	Vitamin K antagonist		-99.89	17-hydroxyprogesterone-caproate	progesterone receptor agonist		-99.82	bepridil	Calcium channel blocker
	-99.72	levetiracetam	Calcium channel blocker		-99.89	bupropion	Dopamine uptake inhibitor		-99.82	metyrapone	Cytochrome P450 inhibitor
	-99.72	palonosetron	Serotonin receptor antagonist		-99.61	warfarin	Vitamin K antagonist		-99.76	estriol	Estrogen receptor agonist
	-99.4	procyclidine	Acetylcholine receptor antagonist		-99.33	mepyramine	Histamine receptor antagonist		-99.61	doxycycline	Bacterial 30S ribosomal subunit inhibitor
	-99.32	ornidazole	Antiprotozoal		-99.3	methoxsalen	DNA synthesis inhibitor		-99.58	bucladesine	Adenosine receptor agonist
	-99.08	guaifenesin	Expectorant		-99.19	niacin	NAD precursor with lipid lowering effects		-99.4	nifurtimox	DNA inhibitor
	-98.74	entecavir	Reverse transcriptase inhibitor		-99.19	ketanserin	Serotonin receptor antagonist		-99.4	vemurafenib	RAF inhibitor
	-98.72	actarit	Interleukin receptor agonist		-99.17	verapamil	Calcium channel blocker		-99.37	pyrazinamide	Fatty acid synthase inhibitor
	-98.7	niridazole	Phosphofructokinase inhibitor		-99.15	atorvastatin	HMGCR inhibitor		-99.24	lapatinib	EGFR inhibitor
	-98.52	carbamazepine	Carboxamide antiepileptic		-98.87	rimexolone	Glucocorticoid receptor agonist		-99.21	nifedipine	Calcium channel blocker
	-98.52	coumarin	Vitamin K antagonist		-98.77	felbamate	Glutamate receptor antagonist		-99.15	chloroquine	Antimalarial
	-98.34	trimethobenzamide	Histamine receptor antagonist		-98.58	pirlindole	Monoamine oxidase inhibitor		-98.98	acarbose	Glucosidase inhibitor
	-98.29	niacin	NAD precursor with lipid lowering effects		-98.27	betamethasone	Glucocorticoid receptor agonist		-98.94	altretamine	DNA synthesis inhibitor
	-98.17	oxybutynin	Acetylcholine receptor antagonist		-98.1	doxycycline	Bacterial 30S ribosomal subunit inhibitor		-98.87	irbesartan	Angiotensin receptor antagonist
	-98.1	memantine	Glutamate receptor antagonist		-98.02	dilazep	Adenosine reuptake inhibitor		-98.82	nevirapine	Reverse transcriptase inhibitor
	-98.01	esmolol	Adrenergic receptor antagonist		-98	milrinone	Phosphodiesterase inhibitor		-98.73	itopride	Dopamine receptor antagonist
	-97.89	hydrocortisone	Glucocorticoid receptor agonist		-97.92	memantine	Glutamate receptor antagonist		-98.7	actarit	Interleukin receptor agonist
	-97.64	fluocinonide	Glucocorticoid receptor agonist		-97.8	guaifenesin	Expectorant		-98.31	paclitaxel	Tubulin inhibitor
	-97.48	betamethasone	Glucocorticoid receptor agonist		-97.71	repaglinide	Insulin secretagogue		-98.27	vinpocetine	Phosphodiesterase inhibitor
	-97.36	dilazep	Adenosine reuptake inhibitor		-97.67	palonosetron	Serotonin receptor antagonist		-98.24	cefpodoxime	Bacterial cell wall synthesis inhibitor
	-97.18	dexamethasone	Glucocorticoid receptor agonist		-97.64	dexamethasone	Glucocorticoid receptor agonist		-98.24	dasatinib	BCR-ABL kinase inhibitor
	-96.9	elvitegravir	HIV integrase inhibitor		-97.33	ramipril	ACE inhibitor		-98.01	phenazone	Cyclooxygenase inhibitor
	-96.83	estropipate	Estrogen receptor agonist		-97.31	temozolomide	DNA alkylating agent		-97.85	raltegravir	HIV integrase inhibitor
	-96.64	propafenone	Antiarrhythmic		-97.3	meclofenamic-acid	Cyclooxygenase inhibitor		-97.78	phensuximide	Succinimide antiepileptic
	-96.54	hydrocortisone	Glucocorticoid receptor agonist		-97.21	nilutamide	Androgen receptor antagonist		-97.47	fasudil	Rho associated kinase inhibitor
	-96.48	vemurafenib	RAF inhibitor		-97	hydrocortisone	Glucocorticoid receptor agonist		-97.46	cefazolin	Bacterial cell wall synthesis inhibitor
	-96.26	methylprednisolone	Glucocorticoid receptor agonist		-96.97	terazosin	Adrenergic receptor antagonist		-97.36	estropipate	Estrogen receptor agonist
	-96.09	tacrolimus	Calcineurin inhibitor		-96.94	deferiprone	Chelating agent		-97.32	entecavir	Reverse transcriptase inhibitor
	-95.89	albendazole	Anthelmintic		-96.83	fluticasone	Glucocorticoid receptor agonist		-97.31	mesna	Antioxidant
	-95.79	naphazoline	Adrenergic receptor agonist		-96.83	vemurafenib	RAF inhibitor		-97.16	mesoridazine	Dopamine receptor antagonist
	-95.77	metyrapone	Cytochrome P450 inhibitor		-96.79	estropipate	Estrogen receptor agonist		-97	nitrendipine	Calcium channel blocker
	-95.76	zuclopenthixol	Dopamine receptor antagonist		-96.3	lapatinib	EGFR inhibitor		-96.9	idarubicin	Topoisomerase inhibitor
	-95.54	rimexolone	Glucocorticoid receptor agonist		-96.16	dexamethasone	Glucocorticoid receptor agonist		-96.75	forskolin	Adenylyl cyclase activator
	-95.32	fluocinonide	Glucocorticoid receptor agonist		-96.12	acepromazine	Dopamine receptor antagonist		-96.7	acamprosate	Glutamate receptor antagonist
	-95.07	doxapram	Potassium channel blocker		-95.7	desoximetasone	Glucocorticoid receptor agonist		-96.47	cromoglicic-acid	Immunosuppressant
					-95.56	tocainide	Sodium channel blocker		-96.43	nabumetone	Cyclooxygenase inhibitor
					-95.35	beclometasone	Glucocorticoid receptor agonist		-96.05	benazepril	ACE inhibitor
									-95.98	betamethasone	Glucocorticoid receptor agonist
									-95.97	carprofen	Cyclooxygenase inhibitor
									-95.86	levetiracetam	Calcium channel blocker
									-95.82	daunorubicin	RNA synthesis inhibitor
									-95.75	naftopidil	Adrenergic receptor antagonist
									-95.56	bromocriptine	Dopamine receptor agonist
									-95.55	moxifloxacin	Bacterial DNA gyrase inhibitor
									-95.48	cefoxitin	Bacterial cell wall synthesis inhibitor
									-95.22	pirlindole	Monoamine oxidase inhibitor

## Sheet: DREIMT scores
	Table S10. DREIMT similarity scores for specific compounds with signatures opposite to the indicated immune-related signatures (similarity score <-95).
	Compound	Signature summary	Score
	phensuximide	phensuximide inhibits Macrophage stimulated with IL10 compared to Macrophage stimulated with IL4	-99.9627
	phensuximide	phensuximide inhibits B cell compared to Dendritic cell	-99.9253
	phensuximide	phensuximide inhibits PBMC compared to PBMC stimulated with TIV Influenza vaccine	-97.377
	phensuximide	phensuximide inhibits Macrophage	-96.2793
	phensuximide	phensuximide inhibits OT1 Thymocyte compared to CD8AA Thymocyte	-96.1471
	phensuximide	phensuximide inhibits T CD4+ naÃ¯ve compared to Dendritic cell	-95.9907
	warfarin	warfarin inhibits Macrophage stimulated with IL6 (400 min) and Knock-out model (SOCS3) compared to Macrophage stimulated with IL6 (100 min) and Knock-out model (SOCS3)	-99.9627
	warfarin	warfarin inhibits Macrophage	-99.9627
	warfarin	warfarin inhibits Liver stimulated with IL6 and Knock-out model (IFNG) compared to Liver stimulated with Knock-out model (IFNG)	-99.9627
	warfarin	warfarin inhibits BCL6 (high) T follicular helper compared to T cell	-99.9253
	warfarin	warfarin inhibits T CD4+ compared to T CD4+	-99.9253
	warfarin	warfarin inhibits Neutrophil compared to Neutrophil stimulated with A.phagocytophilum	-99.9253
	warfarin	warfarin inhibits Neutrophil stimulated with IFNg and GM-CSF compared to Neutrophil	-99.8827
	warfarin	warfarin inhibits Consensus signature compared to Consensus signature	-99.2768
	warfarin	warfarin inhibits T cell gamma/delta compared to T cell gamma/delta	-99.1261
	warfarin	warfarin inhibits Dendritic cell compared to Dendritic cell	-98.9582
	warfarin	warfarin inhibits germinal center B cell compared to Plasma cell	-98.9028
	warfarin	warfarin inhibits T CD8+ naÃ¯ve compared to T CD8+ naÃ¯ve	-98.8687
	warfarin	warfarin inhibits T helper compared to T helper stimulated with IL4, anti-CD3 and anti-CD28	-98.08
	warfarin	warfarin inhibits Dendritic cell stimulated with Gardiquimod (30 min) compared to Dendritic cell stimulated with Gardiquimod (12 hours)	-98.0792
	warfarin	warfarin inhibits T CD4+ stimulated with Pioglitazone and Overexpression (PPARG1, FOXP3) compared to T CD4+ stimulated with Pioglitazone and Overexpression (PPARG2, FOXP3)	-97.3303
	warfarin	warfarin inhibits B cell stimulated with CD40L, IL4, IL5, IL2 and Knock-out model (IRF4) compared to B cell stimulated with CD40L, IL4, IL5 and IL2	-96.4574
	warfarin	warfarin inhibits T helper stimulated with IL4, anti-CD3 and anti-CD28 compared to T helper stimulated with IL12, anti-CD3 and anti-CD28	-96.4531
	warfarin	warfarin inhibits B cell stimulated with IL4, IL5, IL2 and Knock-out model (IRF4) compared to B cell stimulated with Knock-out model (IRF4)	-96.321
	warfarin	warfarin inhibits Macrophage compared to Macrophage stimulated with LPS	-96.1325
	warfarin	warfarin inhibits Neutrophil stimulated with CSF2 compared to Neutrophil	-95.9561
	warfarin	warfarin inhibits T regulatory in Colorectal cancer compared to T regulatory	-95.6003
	warfarin	warfarin inhibits T helper 1 compared to T helper 1 stimulated with Knock-out model (EGR2)	-95.4753
	treprostinil	treprostinil inhibits T regulatory	-99.9627
	treprostinil	treprostinil inhibits Splenocyte stimulated with MuLV compared to Splenocyte stimulated with Sendai virus	-99.9253
	treprostinil	treprostinil inhibits Thymus in perdimedullae compared to Thymus in subcapsular	-98.4577
	treprostinil	treprostinil inhibits Macrophage	-98.2433
	ZM-323881	ZM-323881 inhibits PBMC compared to PBMC in Diabetes	-99.9627
	ZM-323881	ZM-323881 inhibits thymic T cell compared to thymic CD24 (low) T cell	-99.9253
	bupropion	bupropion inhibits Macrophage	-99.9627
	bupropion	bupropion inhibits T helper stimulated with IL4, TGFB, anti-CD3 and anti-CD28 compared to T helper stimulated with IL12, TGFB, anti-CD3 and anti-CD28	-99.9253
	TPCA-1	TPCA-1 inhibits T CD8+ effector compared to T CD8+ effector	-99.9627
	TPCA-1	TPCA-1 inhibits Macrophage stimulated with M.bovis compared to Macrophage stimulated with M.bovis and Knock-out model (MYD88)	-99.9253
	TPCA-1	TPCA-1 inhibits T helper stimulated with IL12, anti-CD3 and anti-CD28 compared to T CD4+ naÃ¯ve	-99.4729
	TPCA-1	TPCA-1 inhibits T CD4+ stimulated with cultured (24 hours) compared to T CD4+ stimulated with cultured (0 hours)	-99.1589
	TPCA-1	TPCA-1 inhibits T cell gamma/delta compared to T cell gamma/delta	-98.9794
	TPCA-1	TPCA-1 inhibits Dendritic cell stimulated with R848 (2 hours) compared to Dendritic cell stimulated with R848 (8 hours)	-97.9886
	TPCA-1	TPCA-1 inhibits NK cell compared to alphabeta T CD8+	-97.947
	TPCA-1	TPCA-1 inhibits spleen Macrophage compared to TAM Macrophage in Glioblastoma	-97.7918
	TPCA-1	TPCA-1 inhibits T CD8+ effector compared to T CD8+ effector	-96.7421
	TPCA-1	TPCA-1 inhibits T CD4+ stimulated with Knock-out model (NRAS) compared to T CD4+	-95.6956
	TPCA-1	TPCA-1 inhibits DP Thymocyte stimulated with anti-CD3 compared to DP Thymocyte	-95.1131
	TPCA-1	TPCA-1 inhibits T CD4+ naÃ¯ve compared to T helper 17 stimulated with IL23A, IL1B and IL16	-95.0802
	tipifarnib	tipifarnib inhibits Macrophage	-99.9627
	tipifarnib	tipifarnib inhibits PBMC in Lupus erythematosus compared to PBMC	-99.9253
	tipifarnib	tipifarnib inhibits T regulatory compared to peripheral lymph T cell	-98.4165
	tipifarnib	tipifarnib inhibits T regulatory stimulated with Knock-out model (ADORA2A) compared to T regulatory stimulated with A2A antagonist [ZM241385]	-96.5152
	tipifarnib	tipifarnib inhibits DP Thymocyte stimulated with Knock-out model (ELK1) compared to DP Thymocyte stimulated with anti-CD3 and Knock-out model (ELK1)	-95.8437
	tipifarnib	tipifarnib inhibits Other in Lupus erythematosus compared to Other	-95.5752
	triacsin-c	triacsin-c inhibits pre-theraphy responders Melanoma stimulated with anti-PD1 in Melanoma compared to pre-therapy non-responders Melanoma stimulated with anti-PD1 in Melanoma	-99.9627
	triacsin-c	triacsin-c inhibits T CD4+ compared to T CD4+	-99.9253
	triacsin-c	triacsin-c inhibits T CD8+ naÃ¯ve compared to Dendritic cell	-99.3004
	triacsin-c	triacsin-c inhibits T CD4+ naÃ¯ve compared to Dendritic cell	-98.0013
	triacsin-c	triacsin-c inhibits Dendritic cell stimulated with Gardiquimod (30 min) compared to Dendritic cell stimulated with Gardiquimod (24 hours)	-96.3255
	mepyramine	mepyramine inhibits Macrophage stimulated with Knock-out model (MLL4) compared to Macrophage stimulated with LPS and Knock-out model (MLL4)	-99.9627
	mepyramine	mepyramine inhibits T CD8+ effector stimulated with LCMV compared to T CD8+ effector stimulated with LCMV	-99.9253
	mepyramine	mepyramine inhibits Macrophage M1	-95.4469
	mepyramine	mepyramine inhibits B cell compared to B cell stimulated with anti-IgM	-95.315
	methoxsalen	methoxsalen inhibits Macrophage stimulated with IL4 compared to Macrophage stimulated with IL10	-99.9627
	methoxsalen	methoxsalen inhibits Monocyte stimulated with anti-TREM1 and LPS compared to Monocyte stimulated with IgG	-99.9253
	niacin	niacin inhibits responder Melanoma stimulated with anti-PD1 in Melanoma compared to non-responder Melanoma stimulated with anti-PD1 in Melanoma	-99.9627
	niacin	niacin inhibits Other compared to Other in SjÃ¶gren syndrome	-99.9627
	niacin	niacin inhibits T cell gamma/delta compared to T cell gamma/delta	-99.9627
	niacin	niacin inhibits spleen Macrophage compared to TAM Macrophage in Colorectal adenocarcinoma	-99.9253
	niacin	niacin inhibits Dendritic cell stimulated with R848 compared to Dendritic cell stimulated with LPS	-99.9253
	niacin	niacin inhibits Dendritic cell stimulated with LPS compared to Dendritic cell stimulated with R848 and LPS	-99.9253
	niacin	niacin inhibits T cell gamma/delta compared to T cell gamma/delta	-99.5969
	ketanserin	ketanserin inhibits Consensus signature	-99.9627
	ketanserin	ketanserin inhibits T CD8+ effector stimulated with LCMV compared to T CD8+ effector stimulated with LCMV	-99.9253
	ketanserin	ketanserin inhibits Neutrophil compared to Neutrophil	-99.3226
	verapamil	verapamil inhibits B cell stimulated with PL2-3 compared to B cell stimulated with CpG	-99.9627
	verapamil	verapamil inhibits T CD4+ na├»ve compared to T helper stimulated with IL4, TGFB, anti-CD3 and anti-CD28	-99.9253
	verapamil	verapamil inhibits T CD8+ na├»ve compared to T CD8+ memory	-97.7781
	verapamil	verapamil inhibits multipotent Hematopoietic stem and progenitor cells compared to granulocyte Hematopoietic stem and progenitor cells	-96.3067
	verapamil	verapamil inhibits PBMC compared to PBMC stimulated with TIV Influenza vaccine	-96.1077
