# Supplementary material for: An In-Silico Analysis of Drugs Potentially Modulating the Cytokine Storm Triggered by SARS-CoV-2 Infection<strong> </strong>
Source: Preprints.org preprint supplement (doi:10.20944/preprints202006.0087.v1), 2020-06-07
Supplement: Supplementary file 4 [file Table S2.xlsx]

## Sheet: Table S2
	TABLE S2. CMap classes with associated transcriptional signatures that mimic the different COVID-19 signatures used in this study (similarity score >95).
	CMAP classes correlating to signature			CMAP classes correlating to signature			CMAP classes correlating to signature
	COVIDCS Signature (Zhou et al. (2020))			CSs Signature (Xiong et al. (2020))			CSs[sc] Signature (Liao et al. (2020))
	Score	CMap class		Score	CMap class		Score	CMap class
	100	NFKB Activation GOF		100	NFKB Activation GOF		100	NFKB Activation GOF
	99.97	PKC activator		99.97	PKC activator		99.95	PKC activator
	99.85	Retinoid receptor agonist		99.95	Lysine acetyltransferases LOF		99.85	HSP inhibitor
	99.55	Heat shock 70kDa proteins LOF		99.81	NKL subclass homeoboxes and pseudogenes LOF		99.6	Nucleoporin LOF
	99.5	IKK inhibitor		99.76	Heat shock 70kDa proteins LOF		99.34	Proteasome inhibitor
	99.24	Topoisomerase inhibitor		99.73	FOS transcription factor family GOF		99.3	Topoisomerase inhibitor
	99.2	ATPase inhibitor		99.47	ATPase inhibitor		99.02	NFkB pathway inhibitor
	99.12	PKC inhibitor		99.27	Minor histocompatibility antigens LOF		99.01	Serine proteases GOF
	98.86	Thromboxane receptor antagonist		99.01	Nucleophosmin inhibitor		98.74	NKL subclass homeoboxes and pseudogenes LOF
	98.78	FLT3 inhibitor		98.96	BMP Signaling LOF		98.44	X linked mental retardation group 2 LOF
	98.65	DNA Replication LOF		98.85	Serine proteases GOF		97.74	IKK inhibitor
	98.56	Interleukins GOF		98.58	Homeobox Gene GOF		96.58	Nucleophosmin inhibitor
	98.49	GPCR Subset GOF		98.56	Proteasome Pathway LOF		96.16	C2 domain containing LOF
	98.29	PPAR receptor agonist		98.16	Protein synthesis inhibitor		95.95	LIM class homeoboxes GOF
	98.02	Rho GTPase activating proteins LOF		97.98	Rho GTPase activating proteins LOF		95.83	Protein synthesis inhibitor
	97.92	Kinase anchoring proteins LOF		97.74	IKK inhibitor		95.3	Histone deacetylases LOF
	97.56	Estrogen receptor antagonist		97.7	FLT3 inhibitor
	97.34	Protein synthesis inhibitor		97.22	Nucleoporin LOF
	97.05	KCNJ11 modulator		97.09	Ribonucleotide reductase inhibitor
	96.77	CDK inhibitor		97.08	Structural maintenance of chromosomes proteins LOF
	96.64	HIV protease inhibitor		96.65	PKC inhibitor
	96.55	AHSP Pathway LOF		96.6	AHSP Pathway LOF
	96.31	NKL subclass homeoboxes and pseudogenes LOF		96.57	NFkB pathway inhibitor
	95.99	Serine proteases GOF		96.18	Topoisomerase inhibitor
	95.75	Ribonucleotide reductase inhibitor		95.89	Tubulin inhibitor
	95.58	PARP inhibitor		95.75	Retinoid receptor agonist
	95.35	Lysine acetyltransferases LOF
	95.23	Tubulin inhibitor
	95.17	C2 domain containing LOF
	95.08	Nucleoporin LOF
