# Supplementary material for: An In-Silico Analysis of Drugs Potentially Modulating the Cytokine Storm Triggered by SARS-CoV-2 Infection<strong> </strong>
Source: Preprints.org preprint supplement (doi:10.20944/preprints202006.0087.v1), 2020-06-07
Supplement: Supplementary file 5 [file Table S3.xlsx]

## Sheet: Table S3
	TABLE S3. Genes that, when overexpressed, trigger transcriptional signatures that mimic the different COVID-19 signatures used in this study (similarity score >95).
	Overexpressed genes correlating to signature				Overexpressed genes correlating to signature				Overexpressed genes correlating to signature
	COVIDCS Signature (Zhou et al. (2020))				CSs Signature (Xiong et al. (2020))				CSs[sc] Signature (Liao et al. (2020))
	Score	Gene	Description		Score	Gene	Description		Score	Gene	Description
	99.91	BCL10	-		99.91	TNFRSF1A	Tumour necrosis factor (TNF) receptor family		99.95	TNFRSF1A	Tumour necrosis factor (TNF) receptor family
	99.91	TNFRSF1A	Tumour necrosis factor (TNF) receptor family		99.91	BCL10	-		99.91	IFNG	Interferons
	99.91	TNFRSF10A	Tumour necrosis factor (TNF) receptor family		99.91	CD40	Tumour necrosis factor (TNF) receptor family		99.91	BCL10	-
	99.91	IRF2	-		99.91	LYN	Src family		99.91	TNFRSF10A	Tumour necrosis factor (TNF) receptor family
	99.91	IL1R1	Interleukins and interleukin receptors		99.91	TNFRSF10A	Tumour necrosis factor (TNF) receptor family		99.91	SPIC	ETS Transcription Factors
	99.91	HLF	-		99.91	IRF5	-		99.91	IFNB1	Interferons
	99.91	CD40	Tumour necrosis factor (TNF) receptor family		99.91	TIRAP	-		99.91	HOXA5	Homeoboxes / ANTP class : HOXL subclass
	99.91	CCL2	Chemokine ligands		99.91	TANK	-		99.91	COX5A	Mitochondrial respiratory chain complex
	99.91	PIM1	PIM family		99.91	IRAK2	Interleukin-1 receptor-associated kinase (IRAK) family		99.91	BCL2L2	Serine/threonine phosphatases / Protein phosphatase 1, regulatory subunits
	99.91	TANK	-		99.91	NFE2L2	basic leucine zipper proteins		99.91	DUSP28	Protein tyrosine phosphatases / Class I Cys-based PTPs : Atypical dual specificity phosphatases
	99.91	NFE2L2	basic leucine zipper proteins		99.91	VPS28	-		99.91	FGR	Src family
	99.91	VPS28	-		99.91	EHF	-		99.91	LYN	Src family
	99.91	IRF5	-		99.91	HLF	-		99.88	CD40	Tumour necrosis factor (TNF) receptor family
	99.91	TIRAP	-		99.91	IL1R1	Interleukins and interleukin receptors		99.86	SRC	Src family
	99.91	SRM	-		99.91	CCL2	Chemokine ligands		99.81	ZNF562	Zinc fingers, C2H2-type
	99.91	FADD	-		99.91	IRF2	-		99.81	TIRAP	-
	99.91	LYN	Src family		99.91	IFI16	-		99.77	ADC	-
	99.91	IRAK2	Interleukin-1 receptor-associated kinase (IRAK) family		99.91	PIM1	PIM family		99.68	IRF5	-
	99.91	EBF1	-		99.91	AGTR1	Angiotensin receptors		99.68	LTBR	Tumor necrosis factor receptor superfamily
	99.86	IFNG	Interferons		99.91	TICAM2	-		99.58	RELB	NFkappaB transcription factor family
	99.86	TADA2A	-		99.91	GM2A	-		99.54	HOXB7	Homeoboxes / ANTP class : HOXL subclass
	99.86	SRC	Src family		99.91	FAIM	-		99.51	TADA2A	-
	99.86	SPIC	ETS Transcription Factors		99.91	CFLAR	Endogenous ligands		99.44	FADD	-
	99.86	IFNB1	Interferons		99.91	CXCL2	Endogenous ligands		99.44	SSBP4	-
	99.86	FAIM	-		99.86	SPIC	ETS Transcription Factors		99.31	NEK6	NIMA (never in mitosis gene a)- related kinase (NEK) family
	99.81	GPR119	GPCR / Class A : Orphans		99.86	SRC	Src family		99.03	CBR3	Short chain dehydrogenase/reductase superfamily / Classical SDR fold cluster 1
	99.81	POU5F1	Homeoboxes / POU class		99.86	NR2F6	COUP-TF-like receptors		99.03	MAP3K8	MAPKKK:STE-unique family
	99.81	LTBR	Tumor necrosis factor receptor superfamily		99.86	TADA2A	-		98.94	PBK	TOPK family
	99.81	HOXC10	Homeoboxes / ANTP class : HOXL subclass		99.86	SSBP4	-		98.89	HOXC10	Homeoboxes / ANTP class : HOXL subclass
	99.77	TRAF2	RING-type (C3HC4) zinc fingers		99.86	IL13	Interleukins and interleukin receptors		98.88	GATA3	GATA zinc finger domain containing
	99.77	RELB	NFkappaB transcription factor family		99.86	SPP1	Endogenous ligands		98.84	PHF13	Zinc fingers, PHD-type
	99.77	MAP2K6	MAPKK:STE7 family		99.81	LTBR	Tumor necrosis factor receptor superfamily		98.84	OTX2	Homeoboxes / PRD class
	99.74	RARA	Retinoic acid receptors		99.81	MAP2K6	MAPKK:STE7 family		98.82	RIPK2	Receptor interacting protein kinase (RIPK) family
	99.68	MAPK13	MAPK:p38 subfamily		99.81	TRAF2	RING-type (C3HC4) zinc fingers		98.75	GATA2	GATA zinc finger domain containing
	99.68	EHF	-		99.8	TRAF1	-		98.73	IRAK2	Interleukin-1 receptor-associated kinase (IRAK) family
	99.68	GPR4	GPCR / Class A : Orphans		99.77	HOXC10	Homeoboxes / ANTP class : HOXL subclass		98.69	VPS28	-
	99.68	MBNL1	Zinc fingers, CCCH-type domain containing		99.77	IFNG	Interferons		98.66	CSNK1A1L	Casein kinase 1 (CK1) family
	99.63	BAG1	-		99.77	ZNF583	Zinc fingers, C2H2-type		98.61	PRKCE	Eta subfamily
	99.63	HMGN5	High-mobility group / Canonical		99.72	MAP3K8	MAPKKK:STE-unique family		98.61	PASD1	-
	99.63	RNASET2	-		99.72	HAT1	Histone acetyltransferases (HATs)		98.56	CNOT3	-
	99.63	CALU	EF-hand domain containing		99.68	PRKACA	Protein kinase A		98.47	ZNF653	Zinc fingers, C2H2-type
	99.59	F2R	Protease activated receptors		99.63	LDHA	-		98.47	HPN	Serine peptidases / Transmembrane
	99.58	TRIM9	-		99.63	GADD45A	-		98.47	TIMP3	-
	99.58	DYNLL1	Cytoplasmic dyneins		99.58	KIAA0494	-		98.35	FOXA3	Forkhead boxes
	99.58	KIAA0494	-		99.58	HNF4A	Hepatocyte nuclear factor-4 receptors		98.33	HOXA9	Homeoboxes / ANTP class : HOXL subclass
	99.54	PUF60	RNA binding motif (RRM) containing		99.56	TIMM9	-		98.33	KLF6	Kruppel-like transcription factors
	99.54	SSX2	-		99.49	IFNB1	Interferons		98.24	CASP2	Caspases
	99.49	GPR139	GPCR / Class A : Orphans		99.49	RARA	Retinoic acid receptors		98.19	GPR107	GPCR / Unclassified : 7TM orphan receptors
	99.49	MAP3K8	MAPKKK:STE-unique family		99.46	CAPN1	EF-hand domain containing		98.15	AGPAT2	1-acylglycerol-3-phosphate O-acyltransferases
	99.45	PRKCE	Eta subfamily		99.44	FADD	-		97.92	POU5F1	Homeoboxes / POU class
	99.44	FLI1	ETS Transcription Factors		99.44	POLR2I	RNA polymerase subunits		97.8	EHF	-
	99.4	DUSP28	Protein tyrosine phosphatases / Class I Cys-based PTPs : Atypical dual specificity phosphatases		99.44	HLA-DPB1	Immunoglobulin superfamily / C1-set domain containing		97.71	PRKAG3	AMPK subfamily
	99.35	HBE1	-		99.44	MAT2A	-		97.69	LHX9	Homeoboxes / LIM class
	99.21	PAK4	PAKB subfamily		99.4	DLC1	Rho GTPase activating proteins		97.69	MAP2K6	MAPKK:STE7 family
	99.21	GADD45A	-		99.38	CTBP1	-		97.59	FKBP3	-
	99.21	B3GNT1	-		99.35	RELB	NFkappaB transcription factor family		97.58	RARA	Retinoic acid receptors
	99.21	TSPAN6	Tetraspanins		99.35	GADD45B	-		97.36	ASPH	-
	99.21	TUBD1	Tubulins		99.26	FBXO5	F-boxes / other		97.02	GGA2	-
	99.21	MRPL18	Mitochondrial ribosomal proteins / large subunits		99.26	COX4I1	Mitochondrial respiratory chain complex		96.95	TRAF2	RING-type (C3HC4) zinc fingers
	99.18	ZNF764	Zinc fingers, C2H2-type		99.21	HOXA5	Homeoboxes / ANTP class : HOXL subclass		96.91	CCBL1	Hydrogen sulphide synthesis
	99.17	FGR	Src family		99.21	CAV1	-		96.87	MPZL1	Immunoglobulin superfamily / V-set domain containing
	99.12	GATA2	GATA zinc finger domain containing		99.21	RND3	-		96.85	SMAD1	SMADs
	99.07	HDAC8	Histone deacetylases		99.17	DRD1	Dopamine receptors		96.76	OTX1	Homeoboxes / PRD class
	99.01	HSBP1	-		99.12	SMAD1	SMADs		96.62	HLF	-
	98.98	LIG1	-		99.06	HBE1	-		96.53	TLE1	WD repeat domain containing
	98.96	PRKACA	Protein kinase A		99.03	UBE3C	-		96.49	NXF1	-
	98.89	TAP1	ATP binding cassette transporters / subfamily B		99.03	MBNL2	Zinc fingers, CCCH-type domain containing		96.33	PBXIP1	-
	98.75	STAT1	SH2 domain containing		99.03	MRGPRX3	GPCR / Class A : Orphans		96.3	LSM6	-
	98.75	ACAT2	Lanosterol biosynthesis pathway		98.98	SACM1L	-		96.1	PIK3R3	Phosphatidylinositol kinases
	98.72	ZNF562	Zinc fingers, C2H2-type		98.98	ORMDL3	-		96.02	TPMT	-
	98.7	PLAT	Chymotrypsin		98.89	FOSL1	basic leucine zipper proteins		95.94	ASF1A	-
	98.61	LPAR1	GPCR / Class A : Lysophospholipid receptors : Lysophosphatidic acid		98.84	GATA2	GATA zinc finger domain containing		95.86	ELF4	ETS Transcription Factors
	98.52	OTX2	Homeoboxes / PRD class		98.82	NAB2	-		95.83	EBF1	-
	98.4	IL13	Interleukins and interleukin receptors		98.8	TNFRSF10B	Tumour necrosis factor (TNF) receptor family		95.21	HDAC1	Histone deacetylases
	98.38	IMPA1	Inositol monophosphatase		98.79	DUSP28	Protein tyrosine phosphatases / Class I Cys-based PTPs : Atypical dual specificity phosphatases		95.12	COQ3	-
	98.33	GMEB1	-		98.61	ELF4	ETS Transcription Factors
	98.33	TOR1A	-		98.61	PJA2	RING-type (C3HC4) zinc fingers
	98.29	GAPDH	-		98.61	BAG1	-
	98.29	MRPS2	Mitochondrial ribosomal proteins / small subunits		98.56	CEPT1	-
	98.22	PHF1	Zinc fingers, PHD-type		98.55	TSPAN6	Tetraspanins
	98.19	SACM1L	-		98.51	BNIP3	-
	98.18	UBE3C	-		98.43	FOSL2	basic leucine zipper proteins
	98.15	FOXA3	Forkhead boxes		98.41	ZFAND6	Zinc fingers, AN1-type domain containing
	98.1	CTBP1	-		98.38	POU5F1	Homeoboxes / POU class
	98.08	ASNS	-		98.38	FABP6	Fatty acid binding protein family
	98.08	FBP1	-		98.38	LIG1	-
	98.07	ELF4	ETS Transcription Factors		98.38	ZSWIM2	Zinc fingers, SWIM-type
	97.96	TNFRSF10B	Tumour necrosis factor (TNF) receptor family		98.29	HLA-DRB3	Immunoglobulin superfamily / C1-set domain containing
	97.96	SMAD3	SMADs		98.25	TIMP3	-
	97.93	IFNAR2	Interferon receptor family		98.16	ZNF764	Zinc fingers, C2H2-type
	97.89	HOXB13	Homeoboxes / ANTP class : HOXL subclass		98.15	SFPQ	RNA binding motif (RRM) containing
	97.84	GATAD2B	GATA zinc finger domain containing		98.11	CYP24A1	Cytochrome P450s
	97.75	MAD2L1BP	-		98.08	SPRY2	-
	97.69	CASD1	-		97.92	TXNL1	-
	97.63	ZNF680	Zinc fingers, C2H2-type		97.88	HOXC4	Homeoboxes / ANTP class : HOXL subclass
	97.59	TNF	Tumor necrosis factor (ligand) superfamily		97.8	CARD9	-
	97.41	COMT	Catecholamine turnover		97.73	HMOX2	Haem oxygenase
	97.19	TRAF1	-		97.71	ATP5S	-
	97.17	OSR2	Zinc fingers, C2H2-type		97.69	HOXB13	Homeoboxes / ANTP class : HOXL subclass
	97.17	SLC25A4	Mitochondrial nucleotide transporter subfamily		97.64	FBXW7	F-boxes / WD-40 domains
	97.11	HSF1	-		97.55	PHF5A	Zinc fingers, PHD-type
	97.04	TSPAN4	Tetraspanins		97.53	COMT	Catecholamine turnover
	97	HDAC3	Histone deacetylases		97.45	GGA2	-
	96.99	TNFRSF19	Tumour necrosis factor (TNF) receptor family		97.41	PRKCE	Eta subfamily
	96.9	LDHA	-		97.41	DLX3	Homeoboxes / ANTP class : NKL subclass
	96.89	EDNRB	Endothelin receptors		97.37	IL1B	Interleukins and interleukin receptors
	96.74	CNOT8	-		97.3	ZNF595	Zinc fingers, C2H2-type
	96.71	PRKCZ	Iota subfamily		97.26	RBX1	RING-type (C3HC4) zinc fingers
	96.7	GPR107	GPCR / Unclassified : 7TM orphan receptors		97.22	STAT1	SH2 domain containing
	96.67	RPA2	-		97.21	CDKN1B	-
	96.67	RIPK2	Receptor interacting protein kinase (RIPK) family		97.18	UGCG	Glycosyltransferase family 2 domain containing
	96.61	RARG	Retinoic acid receptors		97.08	FOXA3	Forkhead boxes
	96.55	CAPN1	EF-hand domain containing		96.99	ARPC3	Actin related protein 2/3 complex subunits
	96.46	ZNF548	Zinc fingers, C2H2-type		96.97	OVOL2	Zinc fingers, C2H2-type
	96.4	ADSS	-		96.94	LMNA	Intermediate filaments type V, lamins
	96.35	HOXA5	Homeoboxes / ANTP class : HOXL subclass		96.9	TNF	Tumor necrosis factor (ligand) superfamily
	96.3	JUNB	basic leucine zipper proteins		96.83	DYNLL1	Cytoplasmic dyneins
	96.25	CDKN1B	-		96.81	GPR139	GPCR / Class A : Orphans
	96.25	FOXJ2	Forkhead boxes		96.76	OSR2	Zinc fingers, C2H2-type
	96.25	LPL	-		96.75	TUBD1	Tubulins
	96.21	COX5A	Mitochondrial respiratory chain complex		96.66	PRSS23	Serine peptidases / Serine peptidases
	96.11	PIK3R3	Phosphatidylinositol kinases		96.54	GSTP1	Glutathione S-transferases
	96.11	LGR5	GPCR / Class A : Orphans		96.36	HSBP1	-
	95.92	MEST	-		96.34	TCF4	Basic helix-loop-helix proteins
	95.87	PPAP2A	Lipid phosphate phosphatases		96.3	SRM	-
	95.83	SRD5A1	-		96.29	CKS1B	-
	95.83	ACADS	-		95.97	CNOT7	-
	95.7	ETFA	-		95.96	PAK4	PAKB subfamily
	95.68	FOSL1	basic leucine zipper proteins		95.96	IP6K2	-
	95.49	GGA2	-		95.95	PEX13	-
	95.41	E2F6	-		95.88	PDLIM1	-
	95.4	HNF4A	Hepatocyte nuclear factor-4 receptors		95.86	ARRB1	-
	95.29	SNX7	Sorting nexins		95.6	NFIL3	basic leucine zipper proteins
	95.27	RBX1	RING-type (C3HC4) zinc fingers		95.51	UQCRFS1	Mitochondrial respiratory chain complex / Complex III
	95.04	RRAGC	-		95.47	CHAF1B	WD repeat domain containing
	95.04	ITGB2	Integrins		95.46	CIRBP	RNA binding motif (RRM) containing
					95.37	SMAD3	SMADs
					95.37	RNF11	RING-type (C3HC4) zinc fingers
					95.3	FGFRL1	Immunoglobulin superfamily / I-set domain containing
					95.29	PSMB9	Proteasome (prosome, macropain) subunits
					95.28	ZER1	ZYG11 cell cycle regulator family
					95.25	LDHB	-
					95.22	CASD1	-
					95.19	KNG1	Endogenous ligands
					95	DCP1A	-
