# Supplementary material for: An In-Silico Analysis of Drugs Potentially Modulating the Cytokine Storm Triggered by SARS-CoV-2 Infection<strong> </strong>
Source: Preprints.org preprint supplement (doi:10.20944/preprints202006.0087.v1), 2020-06-07
Supplement: Supplementary file 6 [file Table S4.xlsx]

## Sheet: Table S4
	TABLE S4. Genes that, when downregulated, trigger transcriptional signatures that mimic the different COVID-19 signatures used in this study (similarity score >95).
	Downregulated genes correlating to signature				Downregulated genes correlating to signature				Downregulated genes correlating to signature
	COVIDCS Signature (Zhou et al. (2020))				CSs Signature (Xiong et al. (2020))				CSs[sc] Signature (Liao et al. (2020))
	Score	Gene	Description		Score	Gene	Description		Score	Gene	Description
	99.95	TTC3	RING-type (C3HC4) zinc fingers		99.95	BTG1	-		99.95	ZNF768	Zinc fingers, C2H2-type
	99.95	TSLP	-		99.95	PROCR	CD molecules		99.95	WNT9A	Wingless-type MMTV integration sites
	99.95	ZNHIT3	Zinc fingers, HIT-type		99.95	FAH	-		99.95	UFD1L	-
	99.95	ZNF217	Zinc fingers, C2H2-type		99.95	HIST2H2BE	Histones / Replication-dependent		99.95	STK36	Unc-51-like kinase (ULK) family
	99.95	WNT5A	Endogenous ligands		99.95	TSSC4	-		99.95	SLC35A1	SLC35 family of nucleotide sugar transporters
	99.95	WNT10B	Wingless-type MMTV integration sites		99.95	TTC3	RING-type (C3HC4) zinc fingers		99.95	SFPQ	RNA binding motif (RRM) containing
	99.95	VAMP3	Vesicle-associated membrane proteins		99.95	ETFB	-		99.95	SEC61A2	-
	99.95	TUBB3	Tubulins		99.95	WNT10B	Wingless-type MMTV integration sites		99.95	RYK	Type XV RTKs: RYK
	99.95	SRPRB	-		99.95	VPS28	-		99.95	RRM1	Ribonucleoside-diphosphate reductases
	99.95	SRM	-		99.95	RBM15	RNA binding motif (RRM) containing		99.95	PUF60	RNA binding motif (RRM) containing
	99.95	SQSTM1	-		99.95	MMP14	Matrix metallopeptidase		99.95	PROCR	CD molecules
	99.95	SMNDC1	Tudor domain containing		99.95	SRPRB	-		99.95	PMM2	-
	99.95	SLC35A1	SLC35 family of nucleotide sugar transporters		99.95	ATP11B	Phospholipid-transporting ATPases		99.95	PC	Carboxylases
	99.95	SFPQ	RNA binding motif (RRM) containing		99.95	ERCC3	General transcription factors		99.95	PAF1	-
	99.95	S100A4	EF-hand domain containing		99.95	TSC22D1	-		99.95	MED1	-
	99.95	RIPK2	Receptor interacting protein kinase (RIPK) family		99.95	PIK3R3	Phosphatidylinositol kinases		99.95	IKBKAP	Elongator acetyltransferase complex subunits
	99.95	RBPJ	-		99.95	ZNF217	Zinc fingers, C2H2-type		99.95	HIST1H2AC	Histones / Replication-dependent
	99.95	RBM15B	RNA binding motif (RRM) containing		99.95	TUBB3	Tubulins		99.95	FAM114A2	-
	99.95	PROCR	CD molecules		99.95	MB	-		99.95	ETFB	-
	99.95	PREB	WD repeat domain containing		99.95	TOPBP1	-		99.95	DICER1	-
	99.95	NRBP1	NRBP family		99.95	DERA	-		99.95	BTG1	-
	99.95	NR2F6	COUP-TF-like receptors		99.95	PPIF	-		99.92	UBAP1	-
	99.95	NFKBIA	Ankyrin repeat domain containing		99.95	LHPP	-		99.92	TSSC4	-
	99.95	MRPS2	Mitochondrial ribosomal proteins / small subunits		99.95	ETNK1	-		99.92	TES	-
	99.95	MMP14	Matrix metallopeptidase		99.95	GPER	-		99.92	STAM2	-
	99.95	MB	-		99.95	WNT5A	Endogenous ligands		99.92	RRM2	Ribonucleoside-diphosphate reductases
	99.95	MAP3K14	MAPKKK:STE-unique family		99.95	MEGF9	-		99.92	PAK4	PAKB subfamily
	99.95	IMPA1	Inositol monophosphatase		99.95	HPRT1	-		99.92	FAH	-
	99.95	IKBKAP	Elongator acetyltransferase complex subunits		99.95	RBPJ	-		99.92	ERLIN1	-
	99.95	HSP90B1	Heat shock proteins / HSPC		99.95	RNMT	-		99.92	CCDC86	-
	99.95	HIST2H2BE	Histones / Replication-dependent		99.95	PREB	WD repeat domain containing		99.92	CASC3	-
	99.95	HIST1H2BD	Histones / Replication-dependent		99.95	BLVRA	-		99.92	BUB1B	Bub family
	99.95	FOSL2	basic leucine zipper proteins		99.95	ABCB1	ATP binding cassette transporters / subfamily B		99.92	ABHD2	Abhydrolase domain containing
	99.95	ETFB	-		99.95	ALDH7A1	Aldehyde dehydrogenases		99.89	PNN	-
	99.95	CHIC2	-		99.95	MRPS2	Mitochondrial ribosomal proteins / small subunits		99.89	WNT10B	Wingless-type MMTV integration sites
	99.95	ATP11B	Phospholipid-transporting ATPases		99.92	MAP3K14	MAPKKK:STE-unique family		99.89	UBE2D1	Ubiquitin-conjugating enzymes E2
	99.95	ARAF	RAF family		99.92	PNN	-		99.89	CLCN3	Ion channels / Chloride channels : Voltage-sensitive
	99.95	AKR1A1	Aldo-keto reductases		99.92	ZNHIT3	Zinc fingers, HIT-type		99.87	CYCS	-
	99.92	STK38L	NDR family		99.92	CAV1	-		99.87	LAMP2	CD molecules
	99.92	AHR	Basic helix-loop-helix proteins		99.92	BCL7B	-		99.87	KSR2	RAF family
	99.92	VPS28	-		99.92	SLC5A6	Sodium iodide symporter, sodium-dependent multivitamin transporter and sodium-coupled monocarboxylate transporters		99.87	ERAP2	Aminopeptidase N
	99.92	TM9SF2	-		99.92	TRAFD1	-		99.87	CLPB	Ankyrin repeat domain containing
	99.92	TLE3	WD repeat domain containing		99.92	EPHB2	Type XIII RTKs: Ephrin receptor family		99.84	TSPAN4	Tetraspanins
	99.92	RNF186	RING-type (C3HC4) zinc fingers		99.92	POLB	DNA polymerases		99.84	SOAT1	-
	99.92	PLP2	-		99.92	RNF186	RING-type (C3HC4) zinc fingers		99.84	NR2F6	COUP-TF-like receptors
	99.92	NUP93	-		99.89	FAM114A2	-		99.84	IDH3A	-
	99.92	MED1	-		99.89	MAT2A	-		99.84	EAPP	-
	99.92	GPR176	GPCR / Class A : Orphans		99.89	G2E3	Zinc fingers, PHD-type		99.82	SRM	-
	99.92	GMNN	-		99.89	PLP2	-		99.82	PCNA	-
	99.92	ERCC3	General transcription factors		99.89	NFKBIA	Ankyrin repeat domain containing		99.82	MAP3K14	MAPKKK:STE-unique family
	99.92	DERA	-		99.89	CHAC1	-		99.79	TNKS2	Ankyrin repeat domain containing
	99.92	CLCN3	Ion channels / Chloride channels : Voltage-sensitive		99.89	KISS1R	GPCR / Class A : RF amide peptide receptors		99.79	TMEM2	-
	99.92	CBR1	Prostaglandin synthases		99.89	RBX1	RING-type (C3HC4) zinc fingers		99.79	HIST2H2BE	Histones / Replication-dependent
	99.92	BUB1B	Bub family		99.89	OXA1L	-		99.79	G2E3	Zinc fingers, PHD-type
	99.89	RAVER1	RNA binding motif (RRM) containing		99.88	KIAA0494	-		99.79	BECN1	-
	99.89	PNN	-		99.87	MED1	-		99.76	SMAD1	SMADs
	99.89	IL20	Interleukins and interleukin receptors		99.87	SLC35A1	SLC35 family of nucleotide sugar transporters		99.76	MTX2	-
	99.89	HTRA1	Serine peptidases / Serine peptidases		99.87	CEBPD	basic leucine zipper proteins		99.76	MAX	Basic helix-loop-helix proteins
	99.89	G2E3	Zinc fingers, PHD-type		99.87	IMPA1	Inositol monophosphatase		99.74	ZAK	MLK subfamily
	99.89	FAM114A2	-		99.87	PRKACA	Protein kinase A		99.74	ERCC3	General transcription factors
	99.89	FABP4	Fatty acid binding protein family		99.85	B4GALNT1	Beta 4-glycosyltransferases		99.68	RAVER1	RNA binding motif (RRM) containing
	99.89	CTNND1	Catenins		99.84	CLCN3	Ion channels / Chloride channels : Voltage-sensitive		99.68	ZNF786	Zinc fingers, C2H2-type
	99.89	CEBPD	basic leucine zipper proteins		99.84	BUB1B	Bub family		99.68	TM9SF2	-
	99.89	BCL7B	-		99.84	DLX3	Homeoboxes / ANTP class : NKL subclass		99.68	FAF1	UBX domain containing
	99.89	ARPC1A	Actin related protein 2/3 complex subunits		99.84	SIK1	QIK subfamily		99.66	TTC3	RING-type (C3HC4) zinc fingers
	99.87	ZNF318	Zinc fingers, C2H2-type		99.84	BRAP	RING-type (C3HC4) zinc fingers		99.66	TNFRSF21	Tumour necrosis factor (TNF) receptor family
	99.87	WDR6	WD repeat domain containing		99.84	TBXA2R	GPCR / Class A : Prostanoid receptors		99.66	RNF167	RING-type (C3HC4) zinc fingers
	99.87	HSD17B11	Short chain dehydrogenase/reductase superfamily / Classical SDR fold cluster 3		99.84	ATP5D	ATPases / F-type		99.63	USP6NL	-
	99.86	EAPP	-		99.84	ATG4D	-		99.63	POLA1	DNA polymerases
	99.84	PIK3R3	Phosphatidylinositol kinases		99.84	IL23R	IL-12 receptor family		99.61	ZNF559	Zinc fingers, C2H2-type
	99.84	TRIB3	Trbl family		99.83	SFPQ	RNA binding motif (RRM) containing		99.61	TP53	-
	99.84	RRM1	Ribonucleoside-diphosphate reductases		99.82	PMM2	-		99.58	ATP11B	Phospholipid-transporting ATPases
	99.84	HDGFRP3	-		99.82	PHB2	-		99.55	PHB2	-
	99.84	CFLAR	Endogenous ligands		99.82	LAMTOR3	-		99.54	RIT1	-
	99.84	CDKN1B	-		99.82	ZNF791	Zinc fingers, C2H2-type		99.53	TXN	-
	99.84	CAV1	-		99.82	SMNDC1	Tudor domain containing		99.53	NDUFS6	Mitochondrial respiratory chain complex / Complex I
	99.84	AURKB	Aurora kinase		99.82	AKR1C3	Prostaglandin synthases		99.53	HSPD1	Heat Shock Proteins / Chaperonins
	99.82	TBX2	T-boxes		99.82	S100A4	EF-hand domain containing		99.53	FABP4	Fatty acid binding protein family
	99.82	SCAP	WD repeat domain containing		99.82	ELL3	-		99.53	ARPC5	Actin related protein 2/3 complex subunits
	99.82	PHKB	-		99.82	IDH3B	-		99.51	NUP93	-
	99.82	MEGF9	-		99.82	STX1A	-		99.51	MAT2A	-
	99.82	HPRT1	-		99.82	NF2	A-kinase anchor proteins		99.5	SHB	SH2 domain containing
	99.82	GPER	-		99.79	KSR2	RAF family		99.5	GOLIM4	-
	99.82	ERLIN1	-		99.79	RRM1	Ribonucleoside-diphosphate reductases		99.49	ID1	Basic helix-loop-helix proteins
	99.82	ALDH7A1	Aldehyde dehydrogenases		99.79	PAX8	Paired boxes		99.47	CTNNB1	Catenins
	99.81	DHFR	Oxidoreductases		99.79	FABP4	Fatty acid binding protein family		99.47	BOLA1	-
	99.79	PHB2	-		99.79	RIPK2	Receptor interacting protein kinase (RIPK) family		99.47	AKAP8L	-
	99.79	PEX12	-		99.79	ACAT1	Lanosterol biosynthesis pathway		99.42	TOX2	-
	99.79	NTRK3	Type VII RTKs: Neurotrophin receptor/Trk family		99.79	CAPN1	EF-hand domain containing		99.42	SYNE2	-
	99.76	PEPD	Methionyl aminopeptidase		99.79	SMU1	WD repeat domain containing		99.42	NUP133	-
	99.76	LPAR6	GPCR / Class A : Lysophospholipid receptors : Lysophosphatidic acid		99.79	ME1	-		99.42	ARHGEF6	Rho guanine nucleotide exchange factors
	99.76	GOLIM4	-		99.79	NCOA3	Histone acetyltransferases		99.4	CEBPD	basic leucine zipper proteins
	99.76	EPB41L2	-		99.79	SENP2	-		99.39	TMEM97	-
	99.76	DRAP1	-		99.79	DYNLL1	Cytoplasmic dyneins		99.39	NDUFAF4	Mitochondrial respiratory chain complex assembly factors
	99.74	E2F3	-		99.79	ZFYVE19	Zinc fingers, FYVE domain containing		99.37	AURKB	Aurora kinase
	99.74	WRN	-		99.76	SEC61A2	-		99.31	LYN	Src family
	99.74	TOX2	-		99.76	NUP93	-		99.29	SRPRB	-
	99.74	TFDP1	-		99.76	RAMP1	Receptor (G protein-coupled) activity modifying proteins		99.29	PAN2	Ubiquitin-specific peptidases
	99.74	PXMP2	-		99.76	POLR1C	RNA polymerase subunits		99.29	OXTR	GPCR / Class A : Vasopressin and oxytocin receptors
	99.74	MEOX2	Homeoboxes / ANTP class : HOXL subclass		99.76	GMNN	-		99.29	KIF5C	Kinesins
	99.74	INSIG1	-		99.76	CD99	CD molecules		99.29	CAB39	-
	99.74	GTF2E2	General transcription factors		99.76	AK2	Adenylate kinases		99.27	ARPC1A	Actin related protein 2/3 complex subunits
	99.74	FDPS	Lanosterol biosynthesis pathway		99.76	GPR56	Adhesion Class GPCRs		99.26	DERA	-
	99.74	DICER1	-		99.76	CASP14	Caspases		99.24	MTERFD1	-
	99.74	DCXR	Short chain dehydrogenase/reductase superfamily / Classical SDR fold cluster 1		99.76	HYOU1	Heat shock proteins / HSP70		99.24	DLX2	Homeoboxes / ANTP class : NKL subclass
	99.71	ID1	Basic helix-loop-helix proteins		99.74	DRAP1	-		99.21	DRAP1	-
	99.71	ZNF791	Zinc fingers, C2H2-type		99.74	CHMP2A	Charged multivesicular body proteins		99.18	MOK	RCK family
	99.71	SENP2	-		99.74	ZNF331	Zinc fingers, C2H2-type		99.18	DECR1	Short chain dehydrogenase/reductase superfamily / Classical SDR fold cluster 1
	99.71	NUAK1	NuaK subfamily		99.74	E2F4	-		99.17	IGFBP5	insulin-like growth factor (IGF) binding proteins
	99.71	GHR	Prolactin receptor family		99.74	NR2F6	COUP-TF-like receptors		99.16	PIM2	PIM family
	99.71	DLX3	Homeoboxes / ANTP class : NKL subclass		99.74	TMEM109	-		99.16	VPS28	-
	99.71	ATG4D	-		99.74	GCA	EF-hand domain containing		99.16	HIGD2A	-
	99.7	TCEB3C	-		99.74	TYK2	Janus kinase (JakA) family		99.16	FPGS	-
	99.69	MAT2A	-		99.72	PAPD7	-		99.16	CREB3	basic leucine zipper proteins
	99.68	TBXA2R	GPCR / Class A : Prostanoid receptors		99.71	NRBP1	NRBP family		99.15	ACAT1	Lanosterol biosynthesis pathway
	99.68	TBK1	IKK family		99.71	CBR1	Prostaglandin synthases		99.13	MEOX2	Homeoboxes / ANTP class : HOXL subclass
	99.68	GATA2	GATA zinc finger domain containing		99.71	CDCA4	-		99.12	TFE3	Basic helix-loop-helix proteins
	99.68	BAZ1B	Zinc fingers, PHD-type		99.71	HSPA5	Heat shock proteins / HSP70		99.05	BCKDK	Pyruvate dehydrogenase kinase (PDHK) family
	99.66	TSC22D1	-		99.68	KIF5C	Kinesins		99.03	RFC5	ATPases / AAA-type
	99.66	HIGD2A	-		99.68	HSPD1	Heat Shock Proteins / Chaperonins		99.03	COPS7A	-
	99.66	FAF1	UBX domain containing		99.68	CBS	Hydrogen sulphide synthesis		99	GSTT1	Glutathione S-transferases / Soluble
	99.63	MERTK	Type XI RTKs: TAM (TYRO3-, AXL- and MER-TK) receptor family		99.68	IL5	Interleukins and interleukin receptors		98.97	QRFPR	GPCR / Class A : RF amide peptide receptors
	99.63	TAGAP	Rho GTPase activating proteins		99.68	DAXX	-		98.97	ARHGEF7	Rho guanine nucleotide exchange factors
	99.63	RNMT	-		99.68	CAMK2D	CAMK2 family		98.95	SRSF3	RNA binding motif (RRM) containing
	99.63	RBM15	RNA binding motif (RRM) containing		99.68	SUZ12	Zinc fingers, C2H2-type		98.92	PET112	-
	99.61	WHSC1	Zinc fingers, PHD-type		99.66	IKBKAP	Elongator acetyltransferase complex subunits		98.87	OGFOD1	-
	99.61	KIAA0753	-		99.66	SRSF3	RNA binding motif (RRM) containing		98.86	ZNF217	Zinc fingers, C2H2-type
	99.59	GPR78	GPCR / Class A : Orphans		99.66	CNOT3	-		98.86	WWTR1	Hippo Signaling
	99.58	CHMP2A	Charged multivesicular body proteins		99.66	GHR	Prolactin receptor family		98.84	RAD54L	-
	99.56	KSR2	RAF family		99.66	AURKAIP1	-		98.82	TOMM22	-
	99.55	SLC5A6	Sodium iodide symporter, sodium-dependent multivitamin transporter and sodium-coupled monocarboxylate transporters		99.66	SCAP	WD repeat domain containing		98.79	S100A4	EF-hand domain containing
	99.55	HSPD1	Heat Shock Proteins / Chaperonins		99.65	DCXR	Short chain dehydrogenase/reductase superfamily / Classical SDR fold cluster 1		98.76	TEAD2	-
	99.55	FAH	-		99.63	P4HA2	-		98.76	FDX1	-
	99.54	ZFYVE19	Zinc fingers, FYVE domain containing		99.61	OGFOD1	-		98.74	STAP2	-
	99.53	HYOU1	Heat shock proteins / HSP70		99.61	MDH2	-		98.71	NQO1	-
	99.53	UFD1L	-		99.61	GNAQ	-		98.67	NFE2L2	basic leucine zipper proteins
	99.53	GSTP1	Glutathione S-transferases		99.61	SLC7A9	SLC7 family		98.64	ZNF131	BTB/POZ domain containing
	99.53	GPR56	Adhesion Class GPCRs		99.58	OXER1	GPCR / Class A : Leukotriene receptors		98.63	CREG1	-
	99.52	TPI1	-		99.58	LIG1	-		98.56	TUBB3	Tubulins
	99.52	SIK1	QIK subfamily		99.58	SPDEF	ETS Transcription Factors		98.55	LSM6	-
	99.5	GPX4	-		99.58	XBP1	basic leucine zipper proteins		98.52	ZNHIT3	Zinc fingers, HIT-type
	99.5	TIAM1	Rho guanine nucleotide exchange factors		99.58	HUS1	-		98.44	NNT	-
	99.5	MRPL12	Mitochondrial ribosomal proteins / large subunits		99.58	CTRB1	-		98.34	AKR1C3	Prostaglandin synthases
	99.47	F11	Chymotrypsin		99.55	SRM	-		98.29	PYCRL	-
	99.47	S100A11	EF-hand domain containing		99.55	UBE2C	Ubiquitin-conjugating enzymes E2		98.18	HTRA1	Serine peptidases / Serine peptidases
	99.47	PPIF	-		99.55	SMARCB1	-		98.15	UCK2	-
	99.47	FDFT1	Lanosterol biosynthesis pathway		99.54	CAPSL	EF-hand domain containing		98.15	KIF21B	Kinesins
	99.47	DDB2	WD repeat domain containing		99.54	CBFB	-		98.13	IRAK2	Interleukin-1 receptor-associated kinase (IRAK) family
	99.45	TOMM34	Tetratricopeptide (TTC) repeat domain containing		99.54	AFP	-		98.11	NUAK1	NuaK subfamily
	99.45	HSPA5	Heat shock proteins / HSP70		99.5	ENDOG	-		98.1	MB	-
	99.45	CREG1	-		99.5	VAMP3	Vesicle-associated membrane proteins		98.08	ENDOG	-
	99.42	LSM6	-		99.5	DHRS3	Short chain dehydrogenase/reductase superfamily / Classical SDR fold cluster 3		98	PSMF1	Proteasome (prosome, macropain) subunits
	99.42	CEPT1	-		99.47	IP6K1	-		98	MMP14	Matrix metallopeptidase
	99.42	ARHGEF5	Rho guanine nucleotide exchange factors		99.46	MAP2K5	MAPKK:STE7 family		97.98	HGS	Zinc fingers, FYVE domain containing
	99.39	SUPT4H1	-		99.45	ZNF787	Zinc fingers, C2H2-type		97.94	IL20	Interleukins and interleukin receptors
	99.39	ZNF433	Zinc fingers, C2H2-type		99.42	FABP5	Fatty acid-binding proteins		97.94	MAPK1IP1L	-
	99.39	PUF60	RNA binding motif (RRM) containing		99.42	GLI3	Zinc fingers, C2H2-type		97.93	SLK	SLK subfamily
	99.39	GRWD1	WD repeat domain containing		99.42	CAST	-		97.92	KAZALD1	Immunoglobulin superfamily / I-set domain containing
	99.39	ERAP2	Aminopeptidase N		99.41	TWF2	Twinfilin subfamily		97.9	RFC2	ATPases / AAA-type
	99.38	ANKRD49	Ankyrin repeat domain containing		99.41	TMEM110	-		97.84	EPHB4	Type XIII RTKs: Ephrin receptor family
	99.37	PCBD1	-		99.4	CRADD	-		97.82	GHR	Prolactin receptor family
	99.36	ZNF787	Zinc fingers, C2H2-type		99.4	SUPT4H1	-		97.79	RANBP9	-
	99.36	RFC1	ATPases / AAA-type		99.4	CTSH	Cathepsins		97.79	CPE	Carboxypeptidase A
	99.35	CANX	-		99.39	PIM2	PIM family		97.75	CSNK2A1	Casein kinase 2 (CK2) family
	99.34	SYNE2	-		99.39	TDRD3	Tudor domain containing		97.74	SLC25A14	Mitochondrial uncoupling proteins
	99.34	CASC3	-		99.39	CDK16	Cyclin-dependent kinases, TAIRE subfamily		97.7	NISCH	-
	99.32	UBAP1	-		99.37	SMAD7	SMADs		97.66	EIF3J	-
	99.32	SV2A	Major facilitator superfamily (MFS) of transporters		99.36	WHSC1	Zinc fingers, PHD-type		97.63	SNX11	Sorting nexins
	99.32	POLR1C	RNA polymerase subunits		99.34	SQRDL	-		97.61	UBE2A	Ubiquitin-conjugating enzymes E2
	99.32	CDK19	Cyclin-dependent kinases, CDK8 subfamily		99.34	CEP72	-		97.61	TRIM13	RING-type (C3HC4) zinc fingers
	99.29	PARP1	Poly (ADP-ribose) polymerases		99.32	OXTR	GPCR / Class A : Vasopressin and oxytocin receptors		97.59	PACSIN3	-
	99.29	RRM2	Ribonucleoside-diphosphate reductases		99.32	ARAF	RAF family		97.58	TSC22D1	-
	99.29	KLF3	Kruppel-like transcription factors		99.3	TWIST1	Basic helix-loop-helix proteins		97.39	PIAS4	Zinc fingers, MIZ-type
	99.29	DSE	-		99.3	PAFAH1B1	WD repeat domain containing		97.35	KIAA0907	-
	99.29	CDK5	Cyclin-dependent kinases, CDK5 subfamily		99.29	KIAA0753	-		97.33	DCXR	Short chain dehydrogenase/reductase superfamily / Classical SDR fold cluster 1
	99.29	ATP5D	ATPases / F-type		99.29	F2R	Protease activated receptors		97.32	RBM15	RNA binding motif (RRM) containing
	99.29	AK2	Adenylate kinases		99.24	ERAP2	Aminopeptidase N		97.31	ZNF791	Zinc fingers, C2H2-type
	99.26	METRN	-		99.24	PTPN11	Protein tyrosine phosphatases		97.26	SMOX	-
	99.26	ELL3	-		99.24	ACAA1	-		97.24	TNFSF15	Tumor necrosis factor (ligand) superfamily
	99.25	STAT5B	SH2 domain containing		99.24	TP53BP2	Ankyrin repeat domain containing		97.2	SLC11A2	SLC11 family of proton-coupled metal ion transporters
	99.23	ZNF768	Zinc fingers, C2H2-type		99.23	ZNF768	Zinc fingers, C2H2-type		97.17	SYT1	Synaptotagmins
	99.21	KIAA0494	-		99.22	POLE2	DNA polymerases		97.17	HDAC11	Histone deacetylases
	99.19	SUZ12	Zinc fingers, C2H2-type		99.21	ACBD3	A-kinase anchor proteins		97.06	CDKN1B	-
	99.17	ZNF589	Zinc fingers, C2H2-type		99.17	FTCD	-		97.04	PCSK9	Subtilisin
	99.16	E2F4	-		99.16	SOAT2	-		97.03	HRSP12	-
	99.13	KIF5C	Kinesins		99.15	TRIP10	-		96.97	PAX8	Paired boxes
	99.13	FGFR1	Type V RTKs: FGF (fibroblast growth factor) receptor family		99.14	RXRG	Retinoid X receptors		96.93	MED15	-
	99.13	F2R	Protease activated receptors		99.13	FDPS	Lanosterol biosynthesis pathway		96.84	SLC7A5	SLC7 family
	99.04	SLC7A9	SLC7 family		99.13	SNX2	Sorting nexins		96.78	CYB5A	Cytochrome b genes
	99.04	RAP1GDS1	Armadillo repeat containing		99.13	NUDCD3	-		96.75	SFMBT1	Sterile alpha motif (SAM) domain containing
	99.03	CYB5A	Cytochrome b genes		99.11	AKAP8L	-		96.71	UNC13B	-
	99.03	PLK1	Polo-like kinase (PLK) family		99.09	HSP90B1	Heat shock proteins / HSPC		96.68	GNG8	-
	99.01	HAT1	Histone acetyltransferases (HATs)		99.08	RIT1	-		96.65	PRKCH	Eta subfamily
	98.97	RAMP1	Receptor (G protein-coupled) activity modifying proteins		99.07	PPAT	Phosphoribosyl pyrophosphate amidotransferase		96.56	XPNPEP1	Methionyl aminopeptidase
	98.95	LTA4H	Hydrolases		99.05	KLF3	Kruppel-like transcription factors		96.46	USP20	Ubiquitin-specific peptidases
	98.92	PLD4	-		99.03	PEPD	Methionyl aminopeptidase		96.41	DFFB	-
	98.92	SLC39A8	SLC39 family of metal ion transporters		99.03	CDK19	Cyclin-dependent kinases, CDK8 subfamily		96.31	ZNF331	Zinc fingers, C2H2-type
	98.91	PC	Carboxylases		99	IL27	Interleukins and interleukin receptors		96.31	TYMS	Methyltransferases
	98.9	SYNGR3	-		98.97	CDKN1B	-		96.27	B3GAT3	Beta-1,3-glucuronyltransferases
	98.9	SPDEF	ETS Transcription Factors		98.97	ARNTL	Basic helix-loop-helix proteins		96.24	PLK1	Polo-like kinase (PLK) family
	98.88	NSF	ATPases / AAA-type		98.95	RPS6KA4	MSK subfamily		96.22	HOXC10	Homeoboxes / ANTP class : HOXL subclass
	98.88	TNFRSF21	Tumour necrosis factor (TNF) receptor family		98.94	PRR15L	-		96.19	F12	Chymotrypsin
	98.87	NAT1	-		98.92	PSMA3	Proteasome subunits		96.18	CHMP2A	Charged multivesicular body proteins
	98.87	HNF1A	Homeoboxes / HNF class		98.92	FOSL2	basic leucine zipper proteins		96.08	GPR176	GPCR / Class A : Orphans
	98.87	C2CD2	-		98.92	AXIN1	Serine/threonine phosphatases / Protein phosphatase 1, regulatory subunits		96.04	FOSL1	basic leucine zipper proteins
	98.85	ETNK1	-		98.89	SNW1	-		95.95	EXOSC4	-
	98.84	TCTA	-		98.89	CARD9	-		95.9	CGRRF1	RING-type (C3HC4) zinc fingers
	98.84	PGM1	-		98.89	JAG1	CD molecules		95.86	KIAA0753	-
	98.84	BCL9	-		98.89	ABCF2	ATP binding cassette transporters / subfamily F		95.84	TARBP1	-
	98.83	SLC6A14	Glycine transporter subfamily		98.89	NEK4	NIMA (never in mitosis gene a)- related kinase (NEK) family		95.83	PTPN11	Protein tyrosine phosphatases
	98.82	MAPK1IP1L	-		98.87	PET112	-		95.82	PSMB1	Proteasome subunits
	98.78	KRT8	Intermediate filaments type II, keratins (basic)		98.87	GPR78	GPCR / Class A : Orphans		95.67	LCMT1	-
	98.78	AOC3	Oxidoreductases		98.85	TAGAP	Rho GTPase activating proteins		95.66	BRCA2	Fanconi anemia, complementation groups
	98.76	ROCK2	Pleckstrin homology (PH) domain containing		98.84	ITGB1BP1	-		95.65	UBE3C	-
	98.75	SLC25A4	Mitochondrial nucleotide transporter subfamily		98.82	AKR1A1	Aldo-keto reductases		95.65	DUSP9	Protein tyrosine phosphatases / Class I Cys-based PTPs : MAP kinase phosphatases
	98.74	SLC29A1	SLC29 family		98.8	HGS	Zinc fingers, FYVE domain containing		95.57	GPR31	GPCR / Class A : Orphans
	98.74	KIF14	Kinesins		98.8	ATP5G1	ATPases / F-type		95.55	FABP1	Fatty acid-binding proteins
	98.74	CBS	Hydrogen sulphide synthesis		98.79	NET1	Rho guanine nucleotide exchange factors		95.49	PCDHA10	Cadherins / Protocadherins : Clustered
	98.73	GFPT1	-		98.79	SACM1L	-		95.47	CARD9	-
	98.68	TOPBP1	-		98.77	TCEB3C	-		95.22	PDS5A	-
	98.68	LHX3	Homeoboxes / LIM class		98.76	PMPCB	-		95.16	RAMP1	Receptor (G protein-coupled) activity modifying proteins
	98.66	ITGB1BP1	-		98.76	HEXIM1	-		95.11	FBXO11	Protein arginine N-methyltransferases
	98.66	CDX2	Homeoboxes / ANTP class : HOXL subclass		98.75	ERLIN1	-		95.07	GPR146	GPCR / Class A : Orphans
	98.65	ASF1A	-		98.73	RPS6KA5	MSK subfamily
	98.64	ZNF764	Zinc fingers, C2H2-type		98.73	FANCG	Fanconi anemia, complementation groups
	98.62	PPP3CC	Serine/threonine phosphatases / Protein phosphatase, catalytic subunits		98.71	KLHL21	BTB/POZ domain containing
	98.61	TMEM110	-		98.7	PHF13	Zinc fingers, PHD-type
	98.61	CRADD	-		98.69	DDB2	WD repeat domain containing
	98.61	C1ORF106	-		98.68	NDUFV1	Mitochondrial respiratory chain complex / Complex I
	98.59	SNX13	Sorting nexins		98.66	TGFA	-
	98.59	CORO1A	Coronins		98.64	ARPC5	Actin related protein 2/3 complex subunits
	98.55	PDCD2	Zinc fingers, MYND-type		98.63	CHERP	G patch domain containing
	98.55	NT5E	Adenosine turnover		98.61	TXLNA	-
	98.53	EIF3J	-		98.58	CEPT1	-
	98.51	PAX8	Paired boxes		98.56	GFOD1	-
	98.5	UROD	-		98.47	SQSTM1	-
	98.48	TMEM2	-		98.47	SMYD3	Chromatin-modifying enzymes / K-methyltransferases
	98.46	ACAT1	Lanosterol biosynthesis pathway		98.47	HDAC5	Histone deacetylases
	98.45	YARS	Aminoacyl tRNA synthetases / Class I		98.46	PSMD3	Proteasome (prosome, macropain) subunits
	98.45	KLHL21	BTB/POZ domain containing		98.45	PRKAG3	AMPK subfamily
	98.45	IL23R	IL-12 receptor family		98.41	PSMB5	Proteasome subunits
	98.42	GPR174	GPCR / Class A : Orphans		98.4	POLR1E	RNA polymerase subunits
	98.4	ZNF238	-		98.39	DGKA	EF-hand domain containing
	98.38	RPA1	-		98.34	NT5E	Adenosine turnover
	98.36	RTCD1	-		98.34	EIF4B	RNA binding motif (RRM) containing
	98.34	AKR1C3	Prostaglandin synthases		98.33	ME2	-
	98.34	ZBTB48	BTB/POZ domain containing		98.32	F11	Chymotrypsin
	98.34	PMM2	-		98.29	HTRA1	Serine peptidases / Serine peptidases
	98.32	CDCA4	-		98.29	ATF2	basic leucine zipper proteins
	98.32	BTBD3	BTB/POZ domain containing		98.26	GPX4	-
	98.31	TNFRSF10B	Tumour necrosis factor (TNF) receptor family		98.23	HIGD2A	-
	98.31	FOSL1	basic leucine zipper proteins		98.21	PTHLH	Endogenous ligands
	98.3	PHGDH	-		98.18	GNG8	-
	98.28	RNF123	RING-type (C3HC4) zinc fingers		98.17	TBK1	IKK family
	98.26	LNPEP	Aminopeptidase N		98.16	CHD8	-
	98.26	ABHD2	Abhydrolase domain containing		98.14	SIRT5	Histone deacetylases
	98.25	TIMM17B	-		98.13	SYF2	-
	98.25	ATF2	basic leucine zipper proteins		98.11	UNC13B	-
	98.21	GGA2	-		98.1	TNKS2	Ankyrin repeat domain containing
	98.16	ZNF182	Zinc fingers, C2H2-type		98.07	EXOSC4	-
	98.13	SMOC2	EF-hand domain containing		98.07	BAZ1B	Zinc fingers, PHD-type
	98.1	PRPF6	-		98.06	GLUD1	-
	98.09	TSPAN4	Tetraspanins		98.02	CCNE1	-
	98.09	STAP2	-		98.01	SMARCE1	-
	98.08	LPAR5	GPCR / Class A : Lysophospholipid receptors : Lysophosphatidic acid		98.01	ADSL	-
	98.08	BTG1	-		97.98	DICER1	-
	98.06	PRKCA	Delta subfamily		97.97	HSPB1	Heat shock proteins / HSPB
	98.02	DECR1	Short chain dehydrogenase/reductase superfamily / Classical SDR fold cluster 1		97.96	GGCX	Carboxylases
	98.01	SNW1	-		97.92	IFNG	Interferons
	97.96	KIAA0196	-		97.91	KAT6A	Histone acetyltransferases (HATs)
	97.95	ANO10	Calcium activated chloride channel		97.91	RNF138	RING-type (C3HC4) zinc fingers
	97.89	MTFR1	-		97.9	CEP55	-
	97.87	WARS2	Aminoacyl tRNA synthetases / Class I		97.88	SYT1	Synaptotagmins
	97.87	TSEN2	tRNA splicing endonuclease subunits		97.88	LIMK2	LIMK subfamily
	97.87	ERF	ETS Transcription Factors		97.87	MEOX2	Homeoboxes / ANTP class : HOXL subclass
	97.87	COG2	Components of oligomeric golgi complex		97.87	SNX13	Sorting nexins
	97.85	TSHZ3	Teashirt zinc fingers		97.84	RNF123	RING-type (C3HC4) zinc fingers
	97.83	GRB2	SH2 domain containing		97.82	NPSR1	GPCR / Class A : Neuropeptide receptors : S
	97.8	BRAP	RING-type (C3HC4) zinc fingers		97.82	LTA4H	Hydrolases
	97.8	MGST2	Glutathione S-transferases / Microsomal		97.81	ID1	Basic helix-loop-helix proteins
	97.74	SOAT1	-		97.8	ARHGEF5	Rho guanine nucleotide exchange factors
	97.57	RFC5	ATPases / AAA-type		97.78	ARFRP1	ADP-ribosylation factors
	97.56	HMGCL	-		97.76	TMEM2	-
	97.56	FBXO21	F-boxes / other		97.76	PLD4	-
	97.55	TPD52L3	-		97.76	METRN	-
	97.55	CTRB2	-		97.74	UFD1L	-
	97.53	MTERFD1	-		97.71	KLHDC2	-
	97.53	CHERP	G patch domain containing		97.66	PPAP2A	Lipid phosphate phosphatases
	97.51	RALBP1	-		97.63	RFC5	ATPases / AAA-type
	97.48	TYK2	Janus kinase (JakA) family		97.63	MERTK	Type XI RTKs: TAM (TYRO3-, AXL- and MER-TK) receptor family
	97.45	DUSP9	Protein tyrosine phosphatases / Class I Cys-based PTPs : MAP kinase phosphatases		97.62	PAK4	PAKB subfamily
	97.45	ATP6V1F	ATPases / V-type		97.61	MYCL1	-
	97.43	STUB1	Tetratricopeptide (TTC) repeat domain containing		97.6	NMUR2	GPCR / Class A : Neuromedin U receptors
	97.43	RFK	-		97.6	MRPL12	Mitochondrial ribosomal proteins / large subunits
	97.42	TRAFD1	-		97.55	STAM2	-
	97.42	MACF1	EF-hand domain containing		97.55	CCND3	-
	97.42	DNPEP	Aminopeptidase I		97.54	CMAS	-
	97.41	MAP2K5	MAPKK:STE7 family		97.54	TCEB3	-
	97.39	TWF2	Twinfilin subfamily		97.54	STAT5B	SH2 domain containing
	97.39	HMGN3	High-mobility group / Canonical		97.48	TCTA	-
	97.37	SENP6	Ulp1 endopeptidase		97.46	CLPP	ATPases / AAA-type
	97.35	GPC1	Proteoglycans / Cell Surface : Glypicans		97.45	HLA-DQB1	Immunoglobulin superfamily / C1-set domain containing
	97.34	NQO1	-		97.44	RASSF2	-
	97.32	SMAD1	SMADs		97.43	BAX	-
	97.32	SACM1L	-		97.42	PRPF6	-
	97.32	NEK7	NIMA (never in mitosis gene a)- related kinase (NEK) family		97.42	KDM1A	Histone demethylase
	97.31	MTA1	GATA zinc finger domain containing		97.4	APP	Endogenous ligands
	97.29	RPS6KA4	MSK subfamily		97.4	LMNB2	Intermediate filaments type V, lamins
	97.29	KBTBD2	BTB/POZ domain containing		97.4	SP140	Zinc fingers, PHD-type
	97.26	PPP4C	Serine/threonine phosphatases / Protein phosphatase, catalytic subunits		97.39	CFTR	ATP binding cassette transporters / subfamily C
	97.25	FAM69A	-		97.33	ACY1	-
	97.24	KISS1R	GPCR / Class A : RF amide peptide receptors		97.3	RHOBTB1	BTB/POZ domain containing
	97.23	VAPB	-		97.29	EMD	-
	97.22	ARID5B	-		97.27	MTFR1	-
	97.18	AIMP2	-		97.26	PDS5A	-
	97.13	CLASRP	-		97.26	GRWD1	WD repeat domain containing
	97.13	ANKZF1	Ankyrin repeat domain containing		97.24	ERGIC1	-
	97.12	UBE3C	-		97.24	SMG7	-
	97.08	PVR	Immunoglobulin superfamily / C2-set domain containing		97.24	EDN1	Endogenous ligands
	97.07	MST1	-		97.21	IRAK2	Interleukin-1 receptor-associated kinase (IRAK) family
	97.07	CD83	CD molecules		97.21	DCK	-
	97.05	PUS10	-		97.2	SLC11A2	SLC11 family of proton-coupled metal ion transporters
	97.04	IDH3A	-		97.18	SMC4	Structural maintenance of chromosomes proteins
	97.04	ERH	-		97.17	NUP133	-
	97.02	ZNF366	Zinc fingers, C2H2-type		97.16	STUB1	Tetratricopeptide (TTC) repeat domain containing
	96.99	IL5	Interleukins and interleukin receptors		97.16	SOCS4	SH2 domain containing
	96.98	AKAP9	A-kinase anchor proteins		97.16	ZDHHC6	Zinc fingers, DHHC-type
	96.93	FGFR1OP	-		97.14	FDX1	-
	96.91	ALDH6A1	Aldehyde dehydrogenases		97.1	TBX2	T-boxes
	96.9	RBBP6	-		97.1	APRT	-
	96.9	AKAP8L	-		97.05	PVR	Immunoglobulin superfamily / C2-set domain containing
	96.89	PPP2R4	Serine/threonine phosphatases / Protein phosphatase 2, regulatory subunits		97.04	NRAS	RAS subfamily
	96.87	GPR152	GPCR / Class A : Orphans		97.04	AHR	Basic helix-loop-helix proteins
	96.84	YWHAH	-		97.04	NUCB2	EF-hand domain containing
	96.83	POLE2	DNA polymerases		97.03	BMPR1A	Type I receptor serine/threonine kinases
	96.81	RFC2	ATPases / AAA-type		97.03	TSHZ3	Teashirt zinc fingers
	96.77	SQRDL	-		97.02	SPAG4	-
	96.72	RYK	Type XV RTKs: RYK		97.02	UBL5	-
	96.68	TIMP1	-		96.95	HDGFRP3	-
	96.67	SLC7A5	SLC7 family		96.95	CIRBP	RNA binding motif (RRM) containing
	96.63	SOCS4	SH2 domain containing		96.94	LRRC32	-
	96.63	PRR15L	-		96.94	MAP7	-
	96.62	EPB41L4B	-		96.93	GPR176	GPCR / Class A : Orphans
	96.61	PHACTR1	Phosphatase and actin regulators		96.88	TFDP1	-
	96.6	GOLT1B	-		96.87	S100A11	EF-hand domain containing
	96.58	CERS2	Homeoboxes / CERS class		96.87	MGAT1	-
	96.54	PKD1	Voltage-gated ion channels / Transient receptor potential cation channels		96.84	CLPB	Ankyrin repeat domain containing
	96.47	LSR	Immunoglobulin superfamily / Immunoglobulin-like domain containing		96.81	PLK1	Polo-like kinase (PLK) family
	96.43	MTX2	-		96.8	USF1	Basic helix-loop-helix proteins
	96.37	LMAN1	-		96.79	DDIT3	-
	96.36	SPAG4	-		96.78	CAPNS2	EF-hand domain containing
	96.32	HSPB8	Heat shock proteins / HSPB		96.75	TOX2	-
	96.29	CARD9	-		96.72	LPAR3	GPCR / Class A : Lysophospholipid receptors : Lysophosphatidic acid
	96.26	ME2	-		96.67	G6PC	-
	96.22	CTSB	Cathepsins		96.65	GNB5	WD repeat domain containing
	96.22	CDC25B	Protein tyrosine phosphatases / Class III Cys-based PTPs		96.64	ARG1	Arginase
	96.22	CALM3	EF-hand domain containing		96.59	RYK	Type XV RTKs: RYK
	96.2	FAT1	Cadherins / Cadherin-related		96.58	TIMM17B	-
	96.11	NUDCD3	-		96.56	USP20	Ubiquitin-specific peptidases
	96.09	NDUFAF4	Mitochondrial respiratory chain complex assembly factors		96.54	PTPN6	Protein tyrosine phosphatases
	96.08	RAI14	Ankyrin repeat domain containing		96.53	IMPDH1	Oxidoreductases
	96.06	MYCL1	-		96.48	FUT2	Fucosyltransferases
	96.01	HEXIM1	-		96.47	DHFR	Oxidoreductases
	95.96	SMARCE1	-		96.45	PRKCB	Alpha subfamily
	95.91	INPP5D	Inositol polyphosphate phosphatases		96.42	EPB41L4B	-
	95.89	GFOD1	-		96.41	B4GALT4	Beta 4-glycosyltransferases
	95.88	ISOC1	-		96.39	ANKZF1	Ankyrin repeat domain containing
	95.88	CEBPA	basic leucine zipper proteins		96.37	PRKCA	Delta subfamily
	95.85	VEGFB	-		96.34	COPA	Endogenous ligands
	95.85	IDH3B	-		96.33	CRAT	-
	95.83	GRK5	GRK1/3 subfamily		96.32	GM2A	-
	95.82	ZGPAT	G patch domain containing		96.22	RBM15B	RNA binding motif (RRM) containing
	95.77	SRRM1	-		96.16	HRSP12	-
	95.76	POFUT1	Fucosyltransferases		96.14	GPX2	-
	95.76	ALG5	Glycosyltransferase family 2 domain containing		96.07	GPR152	GPCR / Class A : Orphans
	95.65	PRKAA1	AMPK subfamily		96.05	IL20	Interleukins and interleukin receptors
	95.61	UBE2C	Ubiquitin-conjugating enzymes E2		96.03	UGP2	-
	95.61	EPHB2	Type XIII RTKs: Ephrin receptor family		96.01	TSLP	-
	95.58	NENF	-		96	ARPC1A	Actin related protein 2/3 complex subunits
	95.58	DHCR7	-		95.95	CNDP2	Carnosine dipeptidase
	95.54	CAPN1	EF-hand domain containing		95.94	ZNF449	Zinc fingers, C2H2-type
	95.49	SYT1	Synaptotagmins		95.87	PSMD4	Proteasome (prosome, macropain) subunits
	95.49	MXI1	Basic helix-loop-helix proteins		95.86	ARID5B	-
	95.46	TAF1B	-		95.75	SRF	-
	95.43	FABP5	Fatty acid-binding proteins		95.72	ENOPH1	-
	95.41	BAG6	-		95.62	FDFT1	Lanosterol biosynthesis pathway
	95.39	APP	Endogenous ligands		95.62	TPD52L2	-
	95.38	DYNLL1	Cytoplasmic dyneins		95.61	TANK	-
	95.37	PAK4	PAKB subfamily		95.59	ALDH6A1	Aldehyde dehydrogenases
	95.35	MCM6	-		95.57	KIAA0907	-
	95.33	IMPDH1	Oxidoreductases		95.55	EIF4A2	DEAD-boxes
	95.33	ATG4B	Aut2 peptidase		95.54	CASP2	Caspases
	95.31	DAXX	-		95.46	SLC25A4	Mitochondrial nucleotide transporter subfamily
	95.3	ZIM3	Zinc fingers, C2H2-type		95.42	AFF1	-
	95.29	FUT2	Fucosyltransferases		95.41	B3GNT1	-
	95.24	PTPN11	Protein tyrosine phosphatases		95.41	TLE3	WD repeat domain containing
	95.24	COPS5	-		95.28	HIST1H2BK	Histones / Replication-dependent
	95.23	ABCD3	ATP binding cassette transporters / subfamily D		95.22	DAP	-
	95.2	TAB2	-		95.17	BTBD3	BTB/POZ domain containing
	95.19	ENOPH1	-		95.17	ZNF238	-
	95.17	SLC16A2	SLC16 family of monocarboxylate transporters		95.14	AKR7A2	Aldo-keto reductases
	95.17	ENDOG	-		95.13	PLA2G15	-
	95.16	PAN2	Ubiquitin-specific peptidases		95.11	ABHD2	Abhydrolase domain containing
	95.15	ERAP1	Aminopeptidase N		95.08	CDKN2B	-
	95.11	ABCF2	ATP binding cassette transporters / subfamily F		95.05	ALAD	-
	95.08	ACAA1	-
	95.02	SRD5A1	-
