# Supplementary material for: An In-Silico Analysis of Drugs Potentially Modulating the Cytokine Storm Triggered by SARS-CoV-2 Infection<strong> </strong>
Source: Preprints.org preprint supplement (doi:10.20944/preprints202006.0087.v1), 2020-06-07
Supplement: Supplementary file 7 [file Table S5.xlsx]

## Sheet: Table S5
	TABLE S5. Compounds that trigger transcriptional signatures that mimic the different COVID-19 signatures used in this study (similarity score >95).
	Compounds positively correlated to signature				Compounds positively correlated to signature				Compounds positively correlated to signature
	COVIDCS Signature (Zhou et al. (2020))				CSs Signature (Xiong et al. (2020))				CSs[sc] Signature (Liao et al. (2020))
	Score	Compound	Description		Score	Compound	Description		Score	Compound	Description
	99.93	prostratin	PKC activator		99.93	BX-795	IKK inhibitor		100	chaetocin	Histone lysine methyltransferase inhibitor
	99.93	BX-795	IKK inhibitor		99.92	chaetocin	Histone lysine methyltransferase inhibitor		99.93	disulfiram	Aldehyde dehydrogenase inhibitor
	99.89	HU-211	Glutamate receptor antagonist		99.89	prostratin	PKC activator		99.89	prostratin	PKC activator
	99.89	LDN-193189	Serine/threonine kinase inhibitor		99.89	phorbol-12-myristate-13-acetate	PKC activator		99.89	menadione	Mitochondrial DNA polymerase inhibitor
	99.89	phorbol-12-myristate-13-acetate	PKC activator		99.89	ingenol	PKC activator		99.89	elesclomol	Oxidative stress inducer
	99.89	SU-11652	Tyrosine kinase inhibitor		99.86	lypressin	Vasopressin receptor agonist		99.86	terreic-acid	BTK inhibitor
	99.89	ingenol	PKC activator		99.86	fosinopril	ACE inhibitor		99.86	ingenol	PKC activator
	99.89	mefloquine	Adenosine receptor antagonist		99.84	SU-11652	Tyrosine kinase inhibitor		99.86	alvespimycin	HSP inhibitor
	99.86	fenretinide	Apoptosis stimulant		99.75	nilotinib	ABL inhibitor		99.86	BX-795	IKK inhibitor
	99.82	avrainvillamide-analog-1	nucleophosmin inhibitor		99.72	roxatidine	Histamine receptor antagonist		99.82	BI-78D3	JNK inhibitor
	99.82	troglitazone	Insulin sensitizer		99.68	avrainvillamide-analog-1	nucleophosmin inhibitor		99.82	JTC-801	Opioid receptor antagonist
	99.79	AT-9283	JAK inhibitor		99.68	physostigmine	Acetylcholinesterase inhibitor		99.82	KI-8751	VEGFR inhibitor
	99.79	acitretin	Retinoid receptor agonist		99.68	pifithrin-alpha	TP53 inhibitor		99.82	BNTX	Opioid receptor antagonist
	99.79	KI-8751	VEGFR inhibitor		99.65	nitazoxanide	Pyruvate ferredoxin oxidoreductase inhibitor		99.79	phorbol-12-myristate-13-acetate	PKC activator
	99.75	nilotinib	ABL inhibitor		99.65	LDN-193189	Serine/threonine kinase inhibitor		99.79	QS-11	ARFGAP inhibitor
	99.68	GW-1929	PPAR receptor agonist		99.58	Merck60	HDAC inhibitor		99.75	ryuvidine	Histone lysine methyltransferase inhibitor
	99.65	CD-437	Retinoid receptor agonist		99.57	KI-8751	VEGFR inhibitor		99.72	BIIB021	HSP inhibitor
	99.65	iodoacetic-acid	Cysteine peptidase inhibitor		99.54	amantadine	Glutamate receptor antagonist		99.68	NSC-632839	Ubiquitin specific protease inhibitor
	99.58	SB-415286	Glycogen synthase kinase inhibitor		99.51	importazole	Importin-beta transport receptor inhibitor		99.68	puromycin	Protein synthesis inhibitor
	99.54	L-655240	Thromboxane receptor antagonist		99.51	H-9	PKA inhibitor		99.68	geldanamycin	HSP inhibitor
	99.54	amsacrine	Topoisomerase inhibitor		99.47	dexbrompheniramine	Histamine receptor antagonist		99.65	LDN-193189	Serine/threonine kinase inhibitor
	99.47	bromhexine	Mucolytic agent		99.47	amsacrine	Topoisomerase inhibitor		99.58	camptothecin	Topoisomerase inhibitor
	99.47	teniposide	Topoisomerase inhibitor		99.46	10H-phenothiazin-10-yl)(p-tolyl)methanone	Butyrylcholinesterase inhibitor		99.58	HSP90-inhibitor	HSP inhibitor
	99.4	SB-218078	CHK inhibitor		99.44	primaquine	Antimalarial		99.47	importazole	Importin-beta transport receptor inhibitor
	99.4	corynanthine	Adrenergic receptor antagonist		99.4	disulfiram	Aldehyde dehydrogenase inhibitor		99.44	16,16-dimethylprostaglandin-e2	Prostanoid receptor agonist
	99.39	Merck60	HDAC inhibitor		99.4	iodoacetic-acid	Cysteine peptidase inhibitor		99.44	amsacrine	Topoisomerase inhibitor
	99.37	avrainvillamide-analog-4	nucleophosmin inhibitor		99.4	menadione	Mitochondrial DNA polymerase inhibitor		99.4	7b-cis	Exportin antagonist
	99.37	QS-11	ARFGAP inhibitor		99.31	gitoxigenin	ATPase inhibitor		99.4	NVP-AUY922	HSP inhibitor
	99.33	alitretinoin	Retinoid receptor agonist		99.26	HDAC1-selective	HDAC inhibitor		99.4	CD-437	Retinoid receptor agonist
	99.33	importazole	Importin-beta transport receptor inhibitor		99.26	helveticoside	ATPase inhibitor		99.4	iodoacetic-acid	Cysteine peptidase inhibitor
	99.33	LY-83583	Guanylyl cyclase inhibitor		99.22	urapidil	Adrenergic receptor antagonist		99.37	cimaterol	Adrenergic receptor agonist
	99.33	calyculin	Protein phosphatase inhibitor		99.19	RX-821002	Adrenergic receptor antagonist		99.33	SEW-2871	Lysophospholipid receptor agonist
	99.3	fulvestrant	Estrogen receptor antagonist		99.15	etoposide	Topoisomerase inhibitor		99.33	SA-792709	Retinoid receptor agonist
	99.28	physostigmine	Acetylcholinesterase inhibitor		99.15	cotinine	Nicotine metabolite		99.33	entinostat	HDAC inhibitor
	99.26	scoulerine	Adrenergic receptor antagonist		99.15	CD-437	Retinoid receptor agonist		99.28	arachidonyl-trifluoro-methane	Cytosolic phospholipase inhibitor
	99.23	calmidazolium	Calcium channel blocker		99.15	amperozide	Dopamine receptor antagonist		99.12	teniposide	Topoisomerase inhibitor
	99.19	pyrvinium-pamoate	AKT inhibitor		99.12	protein-tyrosine-phosphatase-inhibitor-IV	Tyrosine phosphatase inhibitor		99.08	SSR-69071	Leukocyte elastase inhibitor
	99.19	gitoxigenin	ATPase inhibitor		99.08	periplocymarin	Apoptosis stimulant		99.05	irinotecan	Topoisomerase inhibitor
	99.16	SCH-79797	Proteasome inhibitor		99.06	FGIN-1-27	Inositol monophosphatase inhibitor		99.02	nilotinib	ABL inhibitor
	99.15	etoposide	Topoisomerase inhibitor		99.05	HU-211	Glutamate receptor antagonist		98.98	SCH-79797	Proteasome inhibitor
	99.08	forskolin	Adenylyl cyclase activator		99.01	SB-415286	Glycogen synthase kinase inhibitor		98.94	cyclopenthiazide	Thiazide diuretic
	99.01	helveticoside	ATPase inhibitor		98.99	xanthohumol	ATPase inhibitor		98.87	SN-38	Topoisomerase inhibitor
	98.94	chlorphensin	Muscle relaxant		98.98	l-stepholidine	Dopamine receptor antagonist		98.77	Merck60	HDAC inhibitor
	98.91	ellipticine	Topoisomerase inhibitor		98.96	salbutamol	Adrenergic receptor agonist		98.73	linifanib	PDGFR receptor inhibitor
	98.91	immepip	Histamine receptor agonist		98.91	JTC-801	Opioid receptor antagonist		98.73	BCI-hydrochloride	Protein phosphatase inhibitor
	98.91	bisindolylmaleimide	CDK inhibitor		98.87	fulvestrant	Estrogen receptor antagonist		98.7	manumycin-a	Farnesyltransferase inhibitor
	98.8	SN-38	Topoisomerase inhibitor		98.87	SN-38	Topoisomerase inhibitor		98.56	pyrrolidine-dithiocarbamate	NFkB pathway inhibitor
	98.8	maackiain	Sodium/glucose cotransporter inhibitor		98.87	mefloquine	Adenosine receptor antagonist		98.56	piperlongumine	Glutathione transferase inhibitor
	98.78	sarmentogenin	ATPase inhibitor		98.86	SB-218078	CHK inhibitor		98.38	mefloquine	Adenosine receptor antagonist
	98.77	CAY-10415	Insulin sensitizer		98.8	tegaserod	Serotonin receptor partial agonist		98.36	YM-155	Survivin inhibitor
	98.76	entinostat	HDAC inhibitor		98.77	arecaidine	Acetylcholine receptor agonist		98.33	WR-216174	PFMRK inhibitor
	98.66	mocetinostat	HDAC inhibitor		98.75	sarmentogenin	ATPase inhibitor		98.29	SIB-1893	Glutamate receptor antagonist
	98.66	tyrphostin-AG-527	Protein tyrosine kinase inhibitor		98.73	sphingosine	Ceramidase inhibitor		98.28	z-leu3-VS	Proteasome inhibitor
	98.65	tyrphostin-AG-555	EGFR inhibitor		98.73	entinostat	HDAC inhibitor		98.27	withaferin-a	IKK inhibitor
	98.63	lobaric-acid	Tyrosine phosphatase inhibitor		98.7	teniposide	Topoisomerase inhibitor		98.27	MG-132	Proteasome inhibitor
	98.59	irinotecan	Topoisomerase inhibitor		98.65	glycopyrrolate	Acetylcholine receptor antagonist		98.24	MLN-2238	Proteasome inhibitor
	98.59	menadione	Mitochondrial DNA polymerase inhibitor		98.62	somatostatin	Somatostatin receptor agonist		98.22	topotecan	Topoisomerase inhibitor
	98.53	trap-101	Nociceptin/orphanin FQ (NOP) receptor antagonist		98.59	CAY-10585	HIF modulator		98.13	pifithrin-mu	HSP inhibitor
	98.48	lypressin	Vasopressin receptor agonist		98.59	bufalin	ATPase inhibitor		98.1	PU-H71	HSP inhibitor
	98.48	BVT-948	Tyrosine phosphatase inhibitor		98.59	ouabain	ATPase inhibitor		98.02	BCL2-inhibitor	BCL inhibitor
	98.45	homatropine	Acetylcholine receptor antagonist		98.52	AT-9283	JAK inhibitor		97.96	thiostrepton	FOXM1 inhibitor
	98.39	KU-C103443N	CDC inhibitor		98.45	ABT-751	Tubulin inhibitor		97.85	QL-XII-47	BTK inhibitor
	98.39	protein-tyrosine-phosphatase-inhibitor-IV	Tyrosine phosphatase inhibitor		98.44	benidipine	Calcium channel blocker		97.78	auranofin	NFkB pathway inhibitor
	98.31	periplocymarin	Apoptosis stimulant		98.41	BX-912	Pyruvate dehydrogenase kinase inhibitor		97.7	everolimus	MTOR inhibitor
	98.27	olaparib	PARP inhibitor		98.38	BVT-948	Tyrosine phosphatase inhibitor		97.53	triamcinolone	Glucocorticoid receptor agonist
	98.27	ouabain	ATPase inhibitor		98.34	digitoxin	ATPase inhibitor		97.21	avrainvillamide-analog-4	nucleophosmin inhibitor
	98.25	cilostamide	Phosphodiesterase inhibitor		98.27	calmidazolium	Calcium channel blocker		97.18	radicicol	HSP inhibitor
	98.24	pirarubicin	Topoisomerase inhibitor		98.27	cinobufagin	ATPase inhibitor		96.86	AT-9283	JAK inhibitor
	98.17	AT-7519	CDK inhibitor		98.27	floxuridine	DNA synthesis inhibitor		96.83	amonafide	Topoisomerase inhibitor
	98.1	tiaprofenic-acid	Cyclooxygenase inhibitor		98.24	raltegravir	HIV integrase inhibitor		96.79	SB-218078	CHK inhibitor
	98.09	JAK3-inhibitor-VI	JAK inhibitor		98.24	JAK3-inhibitor-VI	JAK inhibitor		96.79	NSC-663284	CDC inhibitor
	98.03	camptothecin	Topoisomerase inhibitor		98.24	manumycin-a	Farnesyltransferase inhibitor		96.76	LY-2183240	FAAH inhibitor
	98.03	FGIN-1-27	Inositol monophosphatase inhibitor		98.24	proscillaridin	ATPase inhibitor		96.69	pyrvinium-pamoate	AKT inhibitor
	98.02	aloisine	CDK inhibitor		98.22	avrainvillamide-analog-6	nucleophosmin inhibitor		96.62	parthenolide	NFkB pathway inhibitor
	98	disulfiram	Aldehyde dehydrogenase inhibitor		98.2	NSC-632839	Ubiquitin specific protease inhibitor		96.49	avrainvillamide-analog-6	nucleophosmin inhibitor
	97.94	fosinopril	ACE inhibitor		98.17	calyculin	Protein phosphatase inhibitor		96.48	penfluridol	T-type calcium channel blocker
	97.92	HNHA	HDAC inhibitor		98.13	AS-601245	JNK inhibitor		96.3	avrainvillamide-analog-2	nucleophosmin inhibitor
	97.92	AS-601245	JNK inhibitor		98.1	avrainvillamide-analog-4	nucleophosmin inhibitor		96.3	suloctidil	Adrenergic receptor antagonist
	97.92	proscillaridin	ATPase inhibitor		98.1	bromfenac	Cyclooxygenase inhibitor		96.3	panobinostat	HDAC inhibitor
	97.92	hydroquinine	Antiarrhythmic		98.08	aniracetam	Glutamate receptor agonist		96.2	acetyl-farnesyl-cysteine	Inhibitor of methylation of endogenous isoprenylated proteins
	97.92	mebendazole	Tubulin inhibitor		98.07	remoxipride	Dopamine receptor antagonist		96.09	parthenolide	NFkB pathway inhibitor
	97.9	bongkrek-acid	Mitochondrial ADP, ATP translocase inhibitor		98.04	4-hydroxy-2-nonenal	Cytotoxic lipid peroxidation product		95.84	cephaeline	Protein synthesis inhibitor
	97.85	RO-90-7501	Beta amyloid inhibitor		98.04	BU-226	Imidazoline receptor ligand		95.77	catechin	Beta secretase inhibitor
	97.82	JNJ-7706621	CDK inhibitor		98.02	BIX-01294	Histone lysine methyltransferase inhibitor		95.63	APHA-compound-8	HDAC inhibitor
	97.82	ABT-751	Tubulin inhibitor		98	digoxin	ATPase inhibitor		95.24	lypressin	Vasopressin receptor agonist
	97.78	YM-155	Survivin inhibitor		97.99	QL-XII-47	BTK inhibitor		95.17	apicidin	HDAC inhibitor
	97.74	CO-101244	Ionotropic glutamate receptor antagonist		97.99	irinotecan	Topoisomerase inhibitor		95.08	GDC-0879	RAF inhibitor
	97.74	roscovitine	CDK inhibitor		97.96	AT-7519	CDK inhibitor		95.07	EI-346-erlotinib-analog	EGFR inhibitor
	97.73	digoxin	ATPase inhibitor		97.89	SB-225002	CC chemokine receptor antagonist		95.07	fenretinide	Apoptosis stimulant
	97.67	BMS-345541	IKK inhibitor		97.78	BMS-345541	IKK inhibitor
	97.67	cephaeline	Protein synthesis inhibitor		97.78	palbociclib	CDK inhibitor
	97.6	nisoldipine	Calcium channel blocker		97.74	KU-C103443N	CDC inhibitor
	97.6	cymarin	ATPase inhibitor		97.74	ioxaglic-acid	Radiopaque medium
	97.57	anisomycin	DNA synthesis inhibitor		97.71	narciclasine	Coflilin signaling pathway activator
	97.53	lestaurtinib	FLT3 inhibitor		97.71	vinblastine	Microtubule inhibitor
	97.53	terreic-acid	BTK inhibitor		97.71	anisomycin	DNA synthesis inhibitor
	97.52	glimepiride	Insulin secretagogue		97.71	digitoxigenin	ATPase inhibitor
	97.49	digitoxin	ATPase inhibitor		97.67	YM-155	Survivin inhibitor
	97.46	ENMD-2076	FLT3 inhibitor		97.65	terreic-acid	BTK inhibitor
	97.46	SSR-69071	Leukocyte elastase inhibitor		97.65	aripiprazole	Serotonin receptor agonist
	97.46	penitrem-a	Potassium channel blocker		97.63	hydroxycholesterol	LXR agonist
	97.43	perhexiline	Carnitine palmitoyltransferase inhibitor		97.5	hydroquinine	Antiarrhythmic
	97.42	etomoxir	Carnitine palmitoyltransferase inhibitor		97.49	chlorphensin	Muscle relaxant
	97.41	chaetocin	Histone lysine methyltransferase inhibitor		97.47	cimaterol	Adrenergic receptor agonist
	97.4	bufalin	ATPase inhibitor		97.44	cyproheptadine	Histamine receptor antagonist
	97.36	oxyphenonium	Cholinergic receptor antagonist		97.44	HDAC3-selective	HDAC inhibitor
	97.27	suloctidil	Adrenergic receptor antagonist		97.43	GR-103691	Dopamine receptor antagonist
	97.26	edrophonium	Acetylcholinesterase inhibitor		97.41	raloxifene	Estrogen receptor antagonist
	97.25	triptolide	RNA polymerase inhibitor		97.37	haloperidol	Dopamine receptor antagonist
	97.23	topotecan	Topoisomerase inhibitor		97.36	cymarin	ATPase inhibitor
	97.22	xanthohumol	ATPase inhibitor		97.36	cercosporin	Photoactivated toxin
	97.17	SB-205607	Delta 1 opioid receptor agonist		97.34	gemcitabine	Ribonucleotide reductase inhibitor
	97.13	narciclasine	Coflilin signaling pathway activator		97.32	cycloheximide	Protein synthesis inhibitor
	97.12	alisertib	Aurora kinase inhibitor		97.25	anagrelide	Phosphodiesterase inhibitor
	97.11	16,16-dimethylprostaglandin-e2	Prostanoid receptor agonist		97.23	crizotinib	ALK inhibitor
	97.08	vincristine	Tubulin inhibitor		97.23	peucedanin	Apoptosis stimulant
	97.06	CP-55940	Cannabinoid receptor agonist		97.22	alisertib	Aurora kinase inhibitor
	97.05	obatoclax	BCL inhibitor		97.22	SCH-79797	Proteasome inhibitor
	97.04	gemcitabine	Ribonucleotide reductase inhibitor		97.22	homoharringtonine	Protein synthesis inhibitor
	97.03	BX-912	Pyruvate dehydrogenase kinase inhibitor		97.21	cephaeline	Protein synthesis inhibitor
	97	AG-14361	PARP inhibitor		97.2	GW-405833	Cannabinoid receptor agonist
	97	rhodomyrtoxin-b	sodium fluorescein uptake inhibitor		97.15	QL-X-138	MTOR inhibitor
	96.96	JW-7-24-1	LCK Inhibitor		97.15	16,16-dimethylprostaglandin-e2	Prostanoid receptor agonist
	96.88	CS-110266	Dopamine receptor agonist		97.11	immepip	Histamine receptor agonist
	96.86	pilocarpine	Acetylcholine receptor agonist		97.08	VER-155008	HSP inhibitor
	96.83	KF-38789	P-selectin inhibitor		97.01	bromhexine	Mucolytic agent
	96.83	homoharringtonine	Protein synthesis inhibitor		97	obatoclax	BCL inhibitor
	96.8	5-nonyloxytryptamine	Serotonin receptor agonist		97	GW-1929	PPAR receptor agonist
	96.79	SA-94315	Caspase inhibitor		96.97	SB-431542	TGF beta receptor inhibitor
	96.79	digoxigenin	Steroid		96.9	scoulerine	Adrenergic receptor antagonist
	96.77	HDAC3-selective	HDAC inhibitor		96.89	benzo(a)pyrene	Carcinogen
	96.75	diclofenac	Cyclooxygenase inhibitor		96.86	emetine	Protein synthesis inhibitor
	96.72	DAPT-GSI-IX	Gamma secretase inhibitor		96.84	diflunisal	Prostanoid receptor antagonist
	96.69	IKK-2-inhibitor-V	IKK inhibitor		96.8	homoveratrylamine	Dopamine analog
	96.69	cycloheximide	Protein synthesis inhibitor		96.79	sulforaphane	Antineoplastic
	96.69	BW-B70C	Lipoxygenase inhibitor		96.71	NSC-663284	CDC inhibitor
	96.63	pargyline	Monoamine oxidase inhibitor		96.69	JW-7-24-1	LCK Inhibitor
	96.48	dorsomorphin	AMPK inhibitor		96.55	XL-147	PI3K inhibitor
	96.44	TCPOBOP	CAR agonist		96.53	perhexiline	Carnitine palmitoyltransferase inhibitor
	96.44	QL-XII-47	BTK inhibitor		96.5	QS-11	ARFGAP inhibitor
	96.41	cotinine	Nicotine metabolite		96.41	niclosamide	DNA replication inhibitor
	96.41	rosiglitazone	Insulin sensitizer		96.4	MLN-2238	Proteasome inhibitor
	96.3	penfluridol	T-type calcium channel blocker		96.37	pyrvinium-pamoate	AKT inhibitor
	96.22	aripiprazole	Serotonin receptor agonist		96.34	NAS-181	Serotonin receptor antagonist
	96.21	barasertib	Aurora kinase inhibitor		96.29	SA-792541	CDC inhibitor
	96.18	thiazolopyrimidine	CDC inhibitor		96.12	parbendazole	Tubulin inhibitor
	96.12	tegaserod	Serotonin receptor partial agonist		96.08	penfluridol	T-type calcium channel blocker
	96.11	metronidazole	DNA inhibitor		96.05	APHA-compound-8	HDAC inhibitor
	96.04	BD-1008	Sigma receptor antagonist		96.03	hexamethyleneamiloride	Sodium/hydrogen antiport inhibitor
	96	glycopyrrolate	Acetylcholine receptor antagonist		95.99	icosapent	Platelet aggregation inhibitor
	95.99	ZK-164015	Estrogen receptor antagonist		95.98	lestaurtinib	FLT3 inhibitor
	95.95	JTC-801	Opioid receptor antagonist		95.97	WR-216174	PFMRK inhibitor
	95.92	strophanthidin	ATPase inhibitor		95.91	digoxigenin	Steroid
	95.9	vindesine	Tubulin inhibitor		95.79	tyrphostin-47	EGFR inhibitor
	95.89	metrizamide	Radiopaque medium		95.72	finasteride	5-alpha reductase inhibitor
	95.88	XL-147	PI3K inhibitor		95.7	strophanthidin	ATPase inhibitor
	95.84	cytarabine	Ribonucleotide reductase inhibitor		95.66	verrucarin-a	Protein synthesis inhibitor
	95.84	PHA-665752	c-Met inhibitor		95.65	ruxolitinib	JAK inhibitor
	95.84	podophyllotoxin	Microtubule inhibitor		95.62	tetrindole	Monoamine oxidase inhibitor
	95.75	emetine	Protein synthesis inhibitor		95.6	penicillic-acid	other antibiotic
	95.74	methylene-blue	Guanylyl cyclase inhibitor		95.6	mebendazole	Tubulin inhibitor
	95.68	acamprosate	Glutamate receptor antagonist		95.58	KU-C103871	GSP agonist
	95.67	heliomycin	ATP synthase inhibitor		95.57	mocetinostat	HDAC inhibitor
	95.59	digitoxigenin	ATPase inhibitor		95.48	penitrem-a	Potassium channel blocker
	95.58	salbutamol	Adrenergic receptor agonist		95.42	HNHA	HDAC inhibitor
	95.57	somatostatin	Somatostatin receptor agonist		95.41	clofarabine	Ribonucleoside reductase inhibitor
	95.57	10H-phenothiazin-10-yl)(p-tolyl)methanone	Butyrylcholinesterase inhibitor		95.35	heliomycin	ATP synthase inhibitor
	95.55	ZG-10	JNK inhibitor		95.31	lavendustin-c	EGFR inhibitor
	95.49	indole	aryl hydrocarbon receptor agonist		95.28	7b-cis	Exportin antagonist
	95.42	SID-26681509	Cathepsin inhibitor		95.27	tyrphostin-A9	Protein tyrosine kinase inhibitor
	95.36	pifithrin-alpha	TP53 inhibitor		95.23	tyrphostin-AG-18	EGFR inhibitor
	95.35	targinine	Nitric oxide synthase inhibitor		95.19	bongkrek-acid	Mitochondrial ADP, ATP translocase inhibitor
	95.35	YC-1	Guanylyl cyclase activator		95.14	rhodomyrtoxin-b	sodium fluorescein uptake inhibitor
	95.35	MY-5445	Phosphodiesterase inhibitor		95.08	vanoxerine	Dopamine uptake inhibitor
	95.35	PSB-36	Adenosine receptor antagonist		95.03	SSR-69071	Leukocyte elastase inhibitor
	95.31	tamibarotene	Retinoid receptor agonist
	95.31	tretinoin	Retinoid receptor agonist
	95.25	clotrimazole	Cytochrome P450 inhibitor
	95.25	haloperidol	Dopamine receptor antagonist
	95.23	cimaterol	Adrenergic receptor agonist
	95.15	ritodrine	Adrenergic receptor agonist
	95.13	AKT-inhibitor-IV	AKT inhibitor
	95.09	ethylestrenol	Progesterone receptor agonist
	95.03	15-delta-prostaglandin-j2	PPAR receptor agonist
