# Supplementary material for: An In-Silico Analysis of Drugs Potentially Modulating the Cytokine Storm Triggered by SARS-CoV-2 Infection<strong> </strong>
Source: Preprints.org preprint supplement (doi:10.20944/preprints202006.0087.v1), 2020-06-07
Supplement: Supplementary file 8 [file Table S6.xlsx]

## Sheet: Table S6
	TABLE S6. Medically-approved compounds that trigger transcriptional signatures that mimic the different COVID-19 signatures used in this study (similarity score >95).
	Medically-Approved Compounds positively correlated to signature				Medically-Approved Compounds positively correlated to signature				Medically-Approved Compounds positively correlated to signature
	COVIDCS Signature (Zhou et al. (2020))				CSs Signature (Xiong et al. (2020))				CSs[sc] Signature (Liao et al. (2020))
	Score	Compound	Description		Score	Compound	Description		Score	Compound	Description
	99.89	mefloquine	Adenosine receptor antagonist		99.86	fosinopril	ACE inhibitor		99.93	disulfiram	Aldehyde dehydrogenase inhibitor
	99.79	acitretin	Retinoid receptor agonist		99.75	nilotinib	ABL inhibitor		99.89	menadione	Mitochondrial DNA polymerase inhibitor
	99.75	nilotinib	ABL inhibitor		99.68	physostigmine	Acetylcholinesterase inhibitor		99.44	amsacrine	Topoisomerase inhibitor
	99.54	amsacrine	Topoisomerase inhibitor		99.65	nitazoxanide	Pyruvate ferredoxin oxidoreductase inhibitor		99.12	teniposide	Topoisomerase inhibitor
	99.47	bromhexine	Mucolytic agent		99.54	amantadine	Glutamate receptor antagonist		99.05	irinotecan	Topoisomerase inhibitor
	99.47	teniposide	Topoisomerase inhibitor		99.47	amsacrine	Topoisomerase inhibitor		99.02	nilotinib	ABL inhibitor
	99.3	fulvestrant	Estrogen receptor antagonist		99.44	primaquine	Antimalarial		98.94	cyclopenthiazide	Thiazide diuretic
	99.28	physostigmine	Acetylcholinesterase inhibitor		99.4	disulfiram	Aldehyde dehydrogenase inhibitor		98.87	SN-38	Topoisomerase inhibitor
	99.19	pyrvinium-pamoate	AKT inhibitor		99.4	menadione	Mitochondrial DNA polymerase inhibitor		98.38	mefloquine	Adenosine receptor antagonist
	99.15	etoposide	Topoisomerase inhibitor		99.22	urapidil	Adrenergic receptor antagonist		98.22	topotecan	Topoisomerase inhibitor
	99.08	forskolin	Adenylyl cyclase activator		99.15	etoposide	Topoisomerase inhibitor		97.96	thiostrepton	FOXM1 inhibitor
	98.8	SN-38	Topoisomerase inhibitor		99.15	amperozide	Dopamine receptor antagonist		97.78	auranofin	NFkB pathway inhibitor
	98.59	irinotecan	Topoisomerase inhibitor		98.87	SN-38	Topoisomerase inhibitor		97.7	everolimus	MTOR inhibitor
	98.59	menadione	Mitochondrial DNA polymerase inhibitor		98.87	mefloquine	Adenosine receptor antagonist		97.53	triamcinolone	Glucocorticoid receptor agonist
	98.45	homatropine	Acetylcholine receptor antagonist		98.87	fulvestrant	Estrogen receptor antagonist		96.69	pyrvinium-pamoate	AKT inhibitor
	98.27	olaparib	PARP inhibitor		98.77	arecaidine	Acetylcholine receptor agonist		96.62	parthenolide	NFkB pathway inhibitor
	98.27	ouabain	ATPase inhibitor		98.7	teniposide	Topoisomerase inhibitor		96.48	penfluridol	T-type calcium channel blocker
	98.24	pirarubicin	Topoisomerase inhibitor		98.65	glycopyrrolate	Acetylcholine receptor antagonist		96.3	panobinostat	HDAC inhibitor
	98.1	tiaprofenic-acid	Cyclooxygenase inhibitor		98.59	ouabain	ATPase inhibitor		96.2	acetyl-farnesyl-cysteine	Inhibitor of methylation of endogenous isoprenylated proteins
	98	disulfiram	Aldehyde dehydrogenase inhibitor		98.44	benidipine	Calcium channel blocker		96.09	parthenolide	NFkB pathway inhibitor
	97.94	fosinopril	ACE inhibitor		98.34	digitoxin	ATPase inhibitor
	97.92	mebendazole	Tubulin inhibitor		98.27	floxuridine	DNA synthesis inhibitor
	97.73	digoxin	ATPase inhibitor		98.24	raltegravir	HIV integrase inhibitor
	97.6	nisoldipine	Calcium channel blocker		98.08	aniracetam	Glutamate receptor agonist
	97.52	glimepiride	Insulin secretagogue		98	digoxin	ATPase inhibitor
	97.49	digitoxin	ATPase inhibitor		97.99	irinotecan	Topoisomerase inhibitor
	97.43	perhexiline	Carnitine palmitoyltransferase inhibitor		97.78	palbociclib	CDK inhibitor
	97.36	oxyphenonium	Cholinergic receptor antagonist		97.74	ioxaglic-acid	Radiopaque medium
	97.26	edrophonium	Acetylcholinesterase inhibitor		97.71	vinblastine	Microtubule inhibitor
	97.23	topotecan	Topoisomerase inhibitor		97.65	aripiprazole	Serotonin receptor agonist
	97.08	vincristine	Tubulin inhibitor		97.44	cyproheptadine	Histamine receptor antagonist
	97.04	gemcitabine	Ribonucleotide reductase inhibitor		97.41	raloxifene	Estrogen receptor antagonist
	96.86	pilocarpine	Acetylcholine receptor agonist		97.37	haloperidol	Dopamine receptor antagonist
	96.83	homoharringtonine	Protein synthesis inhibitor		97.34	gemcitabine	Ribonucleotide reductase inhibitor
	96.75	diclofenac	Cyclooxygenase inhibitor		97.25	anagrelide	Phosphodiesterase inhibitor
	96.63	pargyline	Monoamine oxidase inhibitor		97.23	crizotinib	ALK inhibitor
	96.3	penfluridol	T-type calcium channel blocker		97.22	homoharringtonine	Protein synthesis inhibitor
	96.22	aripiprazole	Serotonin receptor agonist		97.01	bromhexine	Mucolytic agent
	96.11	metronidazole	DNA inhibitor		96.84	diflunisal	Prostanoid receptor antagonist
	96	glycopyrrolate	Acetylcholine receptor antagonist		96.53	perhexiline	Carnitine palmitoyltransferase inhibitor
	95.89	metrizamide	Radiopaque medium		96.41	niclosamide	DNA replication inhibitor
	95.84	cytarabine	Ribonucleotide reductase inhibitor		96.37	pyrvinium-pamoate	AKT inhibitor
	95.84	podophyllotoxin	Microtubule inhibitor		96.08	penfluridol	T-type calcium channel blocker
	95.74	methylene-blue	Guanylyl cyclase inhibitor		95.99	icosapent	Platelet aggregation inhibitor
	95.68	acamprosate	Glutamate receptor antagonist		95.72	finasteride	5-alpha reductase inhibitor
	95.31	tamibarotene	Retinoid receptor agonist		95.65	ruxolitinib	JAK inhibitor
	95.31	tretinoin	Retinoid receptor agonist		95.6	mebendazole	Tubulin inhibitor
	95.25	clotrimazole	Cytochrome P450 inhibitor		95.41	clofarabine	Ribonucleoside reductase inhibitor
	95.25	haloperidol	Dopamine receptor antagonist
	95.15	ritodrine	Adrenergic receptor agonist
