# Supplementary material for: An In-Silico Analysis of Drugs Potentially Modulating the Cytokine Storm Triggered by SARS-CoV-2 Infection<strong> </strong>
Source: Preprints.org preprint supplement (doi:10.20944/preprints202006.0087.v1), 2020-06-07
Supplement: Supplementary file 9 [file Table S7.xlsx]

## Sheet: Table S7
	TABLE S7. CMap classes with associated transcriptional signatures opposite to the different COVID-19 signatures used in this study (similarity score <-95).
	CMAP classes negatively correlating to signature			CMAP classes negatively correlating to signature			CMAP classes negatively correlating to signature
	COVIDCS Signature (Zhou et al. (2020))			CSs Signature (Xiong et al. (2020))			CSs[sc] Signature (Liao et al. (2020))
	Score	CMap class		Score	CMap class		Score	CMap class
	-99.82	S100 calcium binding proteins LOF		-98.77	Bromodomain Inhibitor		-99.99	Aminoacyl tRNA synthetases class II LOF
	-99.47	Leucine rich repeat kinase inhibitor		-98.64	Leucine rich repeat kinase inhibitor		-99.59	MEK inhibitor
	-99.36	JAK inhibitor		-98.47	Glucocorticoid receptor agonist		-99.53	Reverse transcriptase inhibitor
	-98.72	MEK inhibitor		-97.91	V type ATPases LOF		-99.08	Bacterial 30S ribosomal subunit inhibitor
	-98.66	Glucocorticoid receptor agonist		-97.02	JAK inhibitor		-99.07	PKA inhibitor
	-98.63	Bromodomain Inhibitor		-95.52	MEK inhibitor		-98.92	Glycogen synthase kinase inhibitor
	-97.24	HSP inhibitor					-98.75	PI3K inhibitor
	-96.55	VEGFR inhibitor					-98.2	Mitochondrial complex IV LOF
	-96.01	Aminoacyl tRNA synthetases class II LOF					-97.92	MDM inhibitor
	-95.99	RAF inhibitor					-97.2	Serotonin receptor agonist
	-95.6	Integrin subunits beta LOF					-97.17	RAF inhibitor
	-95.55	Rho associated kinase inhibitor					-97.05	X linked mental retardation group 1 LOF
	-95.03	Apolipoproteins LOF					-96.45	GPCR Subset GOF
							-95.11	EIF Proteins LOF
