# Supplementary material for: An In-Silico Analysis of Drugs Potentially Modulating the Cytokine Storm Triggered by SARS-CoV-2 Infection<strong> </strong>
Source: Preprints.org preprint supplement (doi:10.20944/preprints202006.0087.v1), 2020-06-07
Supplement: Supplementary file 10 [file Table S8.xlsx]

## Sheet: Table S8
	TABLE S8. Compounds that trigger transcriptional signatures opposite to the different COVID-19 signatures used in this study (similarity score <-95).
	Compounds negatively correlating to signature				Compounds negatively correlating to signature				Compounds negatively correlating to signature
	COVIDCS Signature (Zhou et al. (2020))				CSs Signature (Xiong et al. (2020))				CSs[sc] Signature (Liao et al. (2020))
	Score	Compound	Description		Score	Compound	Description		Score	Compound	Description
	-99.93	lysylphenylalanyl-tyrosine	Heparin activation inhibitor		-99.93	treprostinil	Prostacyclin analog		-99.93	fenoldopam	Dopamine receptor agonist
	-99.93	phensuximide	Succinimide antiepileptic		-99.93	ZM-323881	VEGFR inhibitor		-99.89	4,5-dianilinophthalimide	EGFR inhibitor
	-99.93	FG-7142	GABA benzodiazepine site receptor inverse agonist		-99.93	phensuximide	Succinimide antiepileptic		-99.86	VU-0415374-1	Glutamate receptor modulator
	-99.82	triacsin-c	Adrenergic receptor antagonist		-99.89	17-hydroxyprogesterone-caproate	progesterone receptor agonist		-99.82	bepridil	Calcium channel blocker
	-99.79	warfarin	Vitamin K antagonist		-99.89	bupropion	Dopamine uptake inhibitor		-99.82	indirubin	CDK inhibitor
	-99.75	latrepirdine	Glutamate receptor antagonist		-99.89	TPCA-1	IKK inhibitor		-99.82	metyrapone	Cytochrome P450 inhibitor
	-99.72	palonosetron	Serotonin receptor antagonist		-99.68	tipifarnib	Farnesyltransferase inhibitor		-99.82	nitrocaramiphen	Cholinergic receptor antagonist
	-99.72	levetiracetam	Calcium channel blocker		-99.61	warfarin	Vitamin K antagonist		-99.76	estriol	Estrogen receptor agonist
	-99.68	TPCA-1	IKK inhibitor		-99.61	triacsin-c	Adrenergic receptor antagonist		-99.75	ML-7	Myosin light chain kinase inhibitor
	-99.65	QL-XI-92	DDR1 inhibitor		-99.54	ZK-756326	CC chemokine receptor ligand		-99.72	daphnetin	Protein kinase inhibitor
	-99.58	7,8-dihydro-L-biopterin	Dihydroneopterin aldolase inhibitor		-99.33	mepyramine	Histamine receptor antagonist		-99.65	danoprevir	HCV inhibitor
	-99.47	GW-843682X	PLK inhibitor		-99.3	methoxsalen	DNA synthesis inhibitor		-99.65	orciprenaline	Adrenergic receptor agonist
	-99.44	tolcapone	Catechol O methyltransferase inhibitor		-99.19	niacin	NAD precursor with lipid lowering effects		-99.65	PKCbeta-inhibitor	PKC inhibitor
	-99.42	treprostinil	Prostacyclin analog		-99.19	ketanserin	Serotonin receptor antagonist		-99.61	doxycycline	Bacterial 30S ribosomal subunit inhibitor
	-99.4	procyclidine	Acetylcholine receptor antagonist		-99.17	verapamil	Calcium channel blocker		-99.61	latrepirdine	Glutamate receptor antagonist
	-99.37	OM-137	Aurora kinase inhibitor		-99.15	atorvastatin	HMGCR inhibitor		-99.58	7,8-dihydro-L-biopterin	Dihydroneopterin aldolase inhibitor
	-99.37	auraptene	Nitric oxide production inhibitor		-99.05	avrainvillamide-analog-5	nucleophosmin inhibitor		-99.58	bucladesine	Adenosine receptor agonist
	-99.32	ornidazole	Antiprotozoal		-98.87	rimexolone	Glucocorticoid receptor agonist		-99.58	ergocryptine	Dopamine agonist
	-99.3	kynuramine	Aryl hydrocarbon receptor activator		-98.77	felbamate	Glutamate receptor antagonist		-99.4	nifurtimox	DNA inhibitor
	-99.26	ZM-323881	VEGFR inhibitor		-98.7	GANT-58	GLI antagonist		-99.4	SB-202190	p38 MAPK inhibitor
	-99.22	alprazolam	Benzodiazepine receptor agonist		-98.7	SB-202190	p38 MAPK inhibitor		-99.4	vemurafenib	RAF inhibitor
	-99.15	pyrazolanthrone	JNK inhibitor		-98.66	desoxypeganine	Acetylcholinesterase inhibitor		-99.37	pyrazinamide	Fatty acid synthase inhibitor
	-99.12	fatostatin	SREBP inhibitor		-98.66	benzoxiquine	Anti-infective		-99.35	IRL-2500	Endothelin receptor antagonist
	-99.08	guaifenesin	Expectorant		-98.63	ipsapirone	Serotonin receptor agonist		-99.35	lobendazole	Anthelmintic
	-99.08	benzoxiquine	Anti-infective		-98.63	selumetinib	MEK inhibitor		-99.35	phenformin	AMPK activator
	-99.01	NVP-AUY922	HSP inhibitor		-98.58	pirlindole	Monoamine oxidase inhibitor		-99.33	alrestatin	Aldose reductase inhibitor
	-98.98	PD-0325901	MEK inhibitor		-98.54	eicosatetraynoic-acid	Cyclooxygenase inhibitor		-99.33	phylloquinone	Vitamin K
	-98.91	SB-590885	RAF inhibitor		-98.45	ascorbyl-palmitate	antioxidant		-99.26	alpha-linolenic-acid	Omega 3 fatty acid stimulant
	-98.91	MDM2-inhibitor	MDM inhibitor		-98.44	latrepirdine	Glutamate receptor antagonist		-99.26	harpagoside	Acetylcholinesterase inhibitor
	-98.81	ascorbyl-palmitate	antioxidant		-98.41	RHO-kinase-inhibitor-III[rockout]	Rho associated kinase inhibitor		-99.26	icariin	Phosphodiesterase inhibitor
	-98.74	entecavir	Reverse transcriptase inhibitor		-98.27	MK-5108	Aurora kinase inhibitor		-99.24	lapatinib	EGFR inhibitor
	-98.72	bicuculline	GABA receptor antagonist		-98.27	betamethasone	Glucocorticoid receptor agonist		-99.21	nifedipine	Calcium channel blocker
	-98.72	actarit	Interleukin receptor agonist		-98.2	anpirtoline	Serotonin receptor agonist		-99.15	chloroquine	Antimalarial
	-98.7	JAK3-inhibitor-I	JAK inhibitor		-98.1	doxycycline	Bacterial 30S ribosomal subunit inhibitor		-99.08	L-BSO	Glutathione transferase inhibitor
	-98.7	niridazole	Phosphofructokinase inhibitor		-98.06	VU-0413807-2	Calcium channel blocker		-99.05	AS-703026	MEK inhibitor
	-98.69	XMD-885	Leucine rich repeat kinase inhibitor		-98.02	dilazep	Adenosine reuptake inhibitor		-99.05	RO-19-4605	GABA benzodiazepine site receptor inverse agonist
	-98.52	coumarin	Vitamin K antagonist		-98	milrinone	Phosphodiesterase inhibitor		-98.98	acarbose	Glucosidase inhibitor
	-98.52	carbamazepine	Carboxamide antiepileptic		-97.92	memantine	Glutamate receptor antagonist		-98.94	altretamine	DNA synthesis inhibitor
	-98.5	avrainvillamide-analog-5	nucleophosmin inhibitor		-97.9	SKF-86002	p38 MAPK inhibitor		-98.91	AS-605240	PI3K inhibitor
	-98.49	heraclenol	Vitamin K antagonist		-97.85	XMD-892	MAP kinase inhibitor		-98.91	CL-218872	GABA receptor agonist
	-98.45	tyrphostin-AG-82	EGFR inhibitor		-97.8	guaifenesin	Expectorant		-98.91	taurodeoxycholic-acid	Bile acid
	-98.34	trimethobenzamide	Histamine receptor antagonist		-97.71	repaglinide	Insulin secretagogue		-98.87	irbesartan	Angiotensin receptor antagonist
	-98.31	AS-703026	MEK inhibitor		-97.67	palonosetron	Serotonin receptor antagonist		-98.84	rucaparib	PARP inhibitor
	-98.29	niacin	NAD precursor with lipid lowering effects		-97.67	IWR-1-ENDO	PARP inhibitor		-98.82	nevirapine	Reverse transcriptase inhibitor
	-98.25	XMD-892	MAP kinase inhibitor		-97.64	dexamethasone	Glucocorticoid receptor agonist		-98.8	selumetinib	MEK inhibitor
	-98.17	oxybutynin	Acetylcholine receptor antagonist		-97.33	SB-590885	RAF inhibitor		-98.73	itopride	Dopamine receptor antagonist
	-98.13	PU-H71	HSP inhibitor		-97.33	ramipril	ACE inhibitor		-98.7	actarit	Interleukin receptor agonist
	-98.13	PKCbeta-inhibitor	PKC inhibitor		-97.33	thalidomide	TNF production inhibitor		-98.66	fillalbin	Increases arterial blood pressure
	-98.1	memantine	Glutamate receptor antagonist		-97.31	temozolomide	DNA alkylating agent		-98.63	z-prolyl-prolinal	Prolyl endopeptidase inhibitor
	-98.1	cycloserine	Bacterial cell wall synthesis inhibitor		-97.3	meclofenamic-acid	Cyclooxygenase inhibitor		-98.59	myricetin	Androgen receptor agonist
	-98.1	CAY-10577	Casein kinase inhibitor		-97.22	KUC103904N	-666		-98.56	PD-0325901	MEK inhibitor
	-98.01	esmolol	Adrenergic receptor antagonist		-97.22	PD-173074	FGFR inhibitor		-98.47	eicosatetraynoic-acid	Cyclooxygenase inhibitor
	-97.98	sinensetin	Cyclooxygenase inhibitor		-97.21	nilutamide	Androgen receptor antagonist		-98.47	JAK3-inhibitor-I	JAK inhibitor
	-97.95	LY-303511	Casein kinase inhibitor		-97.12	FR-122047	Cyclooxygenase inhibitor		-98.44	necrostatin-1	RIPK inhibitor
	-97.89	L-BSO	Glutathione transferase inhibitor		-97.08	carbetocin	Oxytocin receptor agonist		-98.31	paclitaxel	Tubulin inhibitor
	-97.89	hydrocortisone	Glucocorticoid receptor agonist		-97.01	QL-XI-92	DDR1 inhibitor		-98.27	1-phenylbiguanide	Serotonin receptor agonist
	-97.85	TG-101348	FLT3 inhibitor		-97	hydrocortisone	Glucocorticoid receptor agonist		-98.27	vinpocetine	Phosphodiesterase inhibitor
	-97.79	PCA-4248	Platelet activating factor receptor antagonist		-96.97	terazosin	Adrenergic receptor antagonist		-98.24	AZD-7762	CHK inhibitor
	-97.71	talampicillin	Bacterial cell wall synthesis inhibitor		-96.94	deferiprone	Chelating agent		-98.24	cefpodoxime	Bacterial cell wall synthesis inhibitor
	-97.71	fluocinolone	Glucocorticoid receptor agonist		-96.83	beta-CCP	Indoleamine 2,3-dioxygenase inhibitor		-98.24	dasatinib	BCR-ABL kinase inhibitor
	-97.64	fluocinonide	Glucocorticoid receptor agonist		-96.83	fluticasone	Glucocorticoid receptor agonist		-98.24	GDC-0941	PI3K inhibitor
	-97.62	WT-171	HDAC inhibitor		-96.83	vemurafenib	RAF inhibitor		-98.24	PIK-75	DNA protein kinase inhibitor
	-97.61	TCS-359	FLT3 inhibitor		-96.79	estropipate	Estrogen receptor agonist		-98.24	WAY-629	Serotonin receptor agonist
	-97.6	ALW-II-38-3	Ephrin inhibitor		-96.74	OM-137	Aurora kinase inhibitor		-98.2	A-443644	AKT inhibitor
	-97.6	PD-173074	FGFR inhibitor		-96.74	GW-441756	Growth factor receptor inhibitor		-98.13	torin-1	MTOR inhibitor
	-97.6	RHO-kinase-inhibitor-III[rockout]	Rho associated kinase inhibitor		-96.53	mevastatin	HMGCR inhibitor		-98.01	phenazone	Cyclooxygenase inhibitor
	-97.53	mometasone	Glucocorticoid receptor agonist		-96.35	GSK-461364	PLK inhibitor		-97.99	SQ-29548	Thromboxane receptor antagonist
	-97.53	phenacetin	Cyclooxygenase inhibitor		-96.33	Cyclo-[Arg-Gly-Asp-D-Phe-Val]	integrin antagonist		-97.96	JNK-9L	JNK inhibitor
	-97.53	carbetocin	Oxytocin receptor agonist		-96.32	pyrazolanthrone	JNK inhibitor		-97.92	pyridine-2-aldoxime	Acetylcholinesterase inhibitor
	-97.48	desoxypeganine	Acetylcholinesterase inhibitor		-96.3	lapatinib	EGFR inhibitor		-97.91	H-8	PKA inhibitor
	-97.48	betamethasone	Glucocorticoid receptor agonist		-96.18	solanine	Acetylcholinesterase inhibitor		-97.89	PD-123319	Angiotensin receptor antagonist
	-97.46	dantron	Laxative		-96.16	dexamethasone	Glucocorticoid receptor agonist		-97.89	ZG-10	JNK inhibitor
	-97.39	BMS-641988	Androgen receptor antagonist		-96.12	acepromazine	Dopamine receptor antagonist		-97.87	PLX-4720	RAF inhibitor
	-97.36	dilazep	Adenosine reuptake inhibitor		-96.12	tubacin	HDAC inhibitor		-97.85	FR-180204	-666
	-97.29	BAY-K8644	Calcium channel activator		-96.04	VEGF-receptor-2-kinase-inhibitor-IV	VEGFR inhibitor		-97.85	raltegravir	HIV integrase inhibitor
	-97.21	beclometasone	Glucocorticoid receptor agonist		-95.97	desoxycortone	Mineralocorticoid receptor agonist		-97.81	practolol	Adrenergic receptor antagonist
	-97.18	tubacin	HDAC inhibitor		-95.91	androstenol	GABA receptor modulator		-97.78	phensuximide	Succinimide antiepileptic
	-97.18	dexamethasone	Glucocorticoid receptor agonist		-95.88	U-99194	Dopamine receptor antagonist		-97.78	SKF-77434	Dopamine receptor agonist
	-97.15	L-690330	Inositol monophosphatase inhibitor		-95.82	VU-0365114-2	M5 modulator		-97.74	PSB-11	Adenosine receptor antagonist
	-97.05	PI-828	PI3K inhibitor		-95.7	desoximetasone	Glucocorticoid receptor agonist		-97.7	gavestinel	Glutamate receptor antagonist
	-97.02	PNU-120596	Acetylcholine receptor agonist		-95.56	tocainide	Sodium channel blocker		-97.58	diethylstilbestrol	Estrogen receptor agonist
	-97	pinocembrin	CYP1B1 inhibitor		-95.56	PD-0325901	MEK inhibitor		-97.5	AZD-8055	MTOR inhibitor
	-96.96	IWR-1-ENDO	PARP inhibitor		-95.49	XMD-1150	Leucine rich repeat kinase inhibitor		-97.5	ER-27319	Mediator release inhibitor
	-96.9	elvitegravir	HIV integrase inhibitor		-95.43	naltrindole	Opioid receptor antagonist		-97.47	fasudil	Rho associated kinase inhibitor
	-96.84	O-1918	Cannabinoid receptor antagonist		-95.35	beclometasone	Glucocorticoid receptor agonist		-97.46	cefazolin	Bacterial cell wall synthesis inhibitor
	-96.83	estropipate	Estrogen receptor agonist		-95.35	alpha-linolenic-acid	Omega 3 fatty acid stimulant		-97.46	tipifarnib	Farnesyltransferase inhibitor
	-96.81	phenformin	AMPK activator		-95.33	GSK-429286A	Rho associated kinase inhibitor		-97.41	heraclenol	Vitamin K antagonist
	-96.79	fluticasone	Glucocorticoid receptor agonist		-95.31	PTB1	AMPK activator		-97.41	nomifensine	Dopamine uptake inhibitor
	-96.77	ML-7	Myosin light chain kinase inhibitor		-95.26	denbufylline	Phosphodiesterase inhibitor		-97.36	estropipate	Estrogen receptor agonist
	-96.72	selumetinib	MEK inhibitor		-95.24	L-690330	Inositol monophosphatase inhibitor		-97.36	farnesol	FXR agonist
	-96.72	tivozanib	VEGFR inhibitor		-95.18	WH-4023	SRC inhibitor		-97.36	GW-311616	Leukocyte elastase inhibitor
	-96.64	propafenone	Antiarrhythmic		-95.14	BRD-K41143549	Glutamate receptor antagonist		-97.32	entecavir	Reverse transcriptase inhibitor
	-96.54	hydrocortisone	Glucocorticoid receptor agonist		-95.07	CO-101244	Ionotropic glutamate receptor antagonist		-97.31	mesna	Antioxidant
	-96.48	vemurafenib	RAF inhibitor						-97.21	cephalosporanic-acid	Bacterial cell wall synthesis inhibitor
	-96.32	WH-4023	SRC inhibitor						-97.16	mesoridazine	Dopamine receptor antagonist
	-96.26	methylprednisolone	Glucocorticoid receptor agonist						-97.1	ciclacillin	Bacterial cell wall synthesis inhibitor
	-96.17	n-(3-acetamidophenyl)-3-chlorobenzamide	Glutamate receptor antagonist						-97	nitrendipine	Calcium channel blocker
	-96.1	PD-184352	MEK inhibitor						-96.99	PNU-22394	Serotonin receptor agonist
	-96.1	EMF-BCA1-64	Caspase inhibitor						-96.99	TPCA-1	IKK inhibitor
	-96.09	tacrolimus	Calcineurin inhibitor						-96.97	dihydrodeoxygedunin	Growth factor receptor activator
	-96.02	LY-320135	Cannabinoid receptor antagonist						-96.97	kenpaullone	CDK inhibitor
	-95.98	tyrphostin-AG-1478	EGFR inhibitor						-96.92	PD-184352	MEK inhibitor
	-95.89	albendazole	Anthelmintic						-96.9	alvocidib	CDK inhibitor
	-95.79	naphazoline	Adrenergic receptor agonist						-96.9	idarubicin	Topoisomerase inhibitor
	-95.77	metyrapone	Cytochrome P450 inhibitor						-96.9	picrotoxin	GABA receptor antagonist
	-95.76	zuclopenthixol	Dopamine receptor antagonist						-96.86	desoxypeganine	Acetylcholinesterase inhibitor
	-95.54	rimexolone	Glucocorticoid receptor agonist						-96.81	RHO-kinase-inhibitor-III[rockout]	Rho associated kinase inhibitor
	-95.5	tyrphostin-AG-112	Protein tyrosine kinase inhibitor						-96.76	prestwick-559	Dopamine receptor agonist
	-95.5	naproxol	Anti-inflammatory						-96.75	forskolin	Adenylyl cyclase activator
	-95.35	XMD-1150	Leucine rich repeat kinase inhibitor						-96.72	NU-7441	DNA dependent protein kinase inhibitor
	-95.32	fluocinonide	Glucocorticoid receptor agonist						-96.7	acamprosate	Glutamate receptor antagonist
	-95.3	WAY-629	Serotonin receptor agonist						-96.7	PI-828	PI3K inhibitor
	-95.28	geldanamycin	HSP inhibitor						-96.51	acetyl-geranygeranyl-cysteine	Inhibitor of methyl esterification of geranylgeranylated proteins
	-95.2	ritanserin	Serotonin receptor antagonist						-96.47	cromoglicic-acid	Immunosuppressant
	-95.07	doxapram	Potassium channel blocker						-96.43	nabumetone	Cyclooxygenase inhibitor
	-95.01	tomelukast	Leukotriene receptor antagonist						-96.4	SCH-28080	ATPase inhibitor
									-96.26	GSK-3-inhibitor-II	PKC inhibitor
									-96.22	oleylethanolamide	Cannabinoid receptor agonist
									-96.22	SB-590885	RAF inhibitor
									-96.16	dactolisib	MTOR inhibitor
									-96.09	alpha-estradiol	Estrogen receptor agonist
									-96.09	altizide	Thiazide diuretic
									-96.05	benazepril	ACE inhibitor
									-96.05	triptolide	RNA polymerase inhibitor
									-95.99	RO-60-0175	Serotonin receptor agonist
									-95.98	betamethasone	Glucocorticoid receptor agonist
									-95.98	prothionamide	Mycobacterium tuberculosis enoyl-[acyl-carrier-protein] reductase [NADH] (inhA) inhibitor
									-95.97	carprofen	Cyclooxygenase inhibitor
									-95.91	CAY-10577	Casein kinase inhibitor
									-95.86	levetiracetam	Calcium channel blocker
									-95.82	daunorubicin	RNA synthesis inhibitor
									-95.76	PD-198306	MAP kinase inhibitor
									-95.75	naftopidil	Adrenergic receptor antagonist
									-95.71	IKK-2-inhibitor	IKK inhibitor
									-95.68	bisindolylmaleimide-ix	CDK inhibitor
									-95.56	bromocriptine	Dopamine receptor agonist
									-95.55	moxifloxacin	Bacterial DNA gyrase inhibitor
									-95.48	cefoxitin	Bacterial cell wall synthesis inhibitor
									-95.46	RS-45041-190	Imidazoline receptor agonist
									-95.42	GSK-3-inhibitor-IX	Glycogen synthase kinase inhibitor
									-95.41	evoxine	Furoquinoline alkaloid
									-95.33	cerivastatin	HMGCR inhibitor
									-95.31	MAZ-51	VEGFR inhibitor
									-95.22	pirlindole	Monoamine oxidase inhibitor
									-95.2	proadifen	Nitric oxide synthase inhibitor
									-95.19	damnacanthal	SRC inhibitor
									-95.18	PETCM	Caspase activator
									-95.11	UNC-0321	Histone lysine methyltransferase inhibitor
									-95.08	kynuramine	Aryl hydrocarbon receptor activator
									-95	ZSTK-474	PI3K inhibitor
