# Supplementary material for: An In-Silico Analysis of Drugs Potentially Modulating the Cytokine Storm Triggered by SARS-CoV-2 Infection<strong> </strong>
Source: Preprints.org preprint supplement (doi:10.20944/preprints202006.0087.v1), 2020-06-07
Supplement: Supplementary file 11 [file Table S9.xlsx]

## Sheet: Table S9
	TABLE S9. Medically-approved compounds that trigger transcriptional signatures opposite to the different COVID-19 signatures used in this study (similarity score <-95).
	Medically-Approved Compounds negatively correlating to signature				Medically-Approved Compounds negatively correlating to signature				Medically-Approved Compounds negatively correlating to signature
	COVIDCS Signature (Zhou et al. (2020))				CSs Signature (Xiong et al. (2020))				CSs[sc] Signature (Liao et al. (2020))
	Score	Compound	Description		Score	Compound	Description		Score	Compound	Description
	-99.93	phensuximide	Succinimide antiepileptic		-99.93	phensuximide	Succinimide antiepileptic		-99.93	fenoldopam	Dopamine receptor agonist
	-99.79	warfarin	Vitamin K antagonist		-99.89	17-hydroxyprogesterone-caproate	progesterone receptor agonist		-99.82	bepridil	Calcium channel blocker
	-99.72	levetiracetam	Calcium channel blocker		-99.89	bupropion	Dopamine uptake inhibitor		-99.82	metyrapone	Cytochrome P450 inhibitor
	-99.72	palonosetron	Serotonin receptor antagonist		-99.61	warfarin	Vitamin K antagonist		-99.76	estriol	Estrogen receptor agonist
	-99.4	procyclidine	Acetylcholine receptor antagonist		-99.33	mepyramine	Histamine receptor antagonist		-99.61	doxycycline	Bacterial 30S ribosomal subunit inhibitor
	-99.32	ornidazole	Antiprotozoal		-99.3	methoxsalen	DNA synthesis inhibitor		-99.58	bucladesine	Adenosine receptor agonist
	-99.08	guaifenesin	Expectorant		-99.19	niacin	NAD precursor with lipid lowering effects		-99.4	nifurtimox	DNA inhibitor
	-98.74	entecavir	Reverse transcriptase inhibitor		-99.19	ketanserin	Serotonin receptor antagonist		-99.4	vemurafenib	RAF inhibitor
	-98.72	actarit	Interleukin receptor agonist		-99.17	verapamil	Calcium channel blocker		-99.37	pyrazinamide	Fatty acid synthase inhibitor
	-98.7	niridazole	Phosphofructokinase inhibitor		-99.15	atorvastatin	HMGCR inhibitor		-99.24	lapatinib	EGFR inhibitor
	-98.52	carbamazepine	Carboxamide antiepileptic		-98.87	rimexolone	Glucocorticoid receptor agonist		-99.21	nifedipine	Calcium channel blocker
	-98.52	coumarin	Vitamin K antagonist		-98.77	felbamate	Glutamate receptor antagonist		-99.15	chloroquine	Antimalarial
	-98.34	trimethobenzamide	Histamine receptor antagonist		-98.58	pirlindole	Monoamine oxidase inhibitor		-98.98	acarbose	Glucosidase inhibitor
	-98.29	niacin	NAD precursor with lipid lowering effects		-98.27	betamethasone	Glucocorticoid receptor agonist		-98.94	altretamine	DNA synthesis inhibitor
	-98.17	oxybutynin	Acetylcholine receptor antagonist		-98.1	doxycycline	Bacterial 30S ribosomal subunit inhibitor		-98.87	irbesartan	Angiotensin receptor antagonist
	-98.1	memantine	Glutamate receptor antagonist		-98.02	dilazep	Adenosine reuptake inhibitor		-98.82	nevirapine	Reverse transcriptase inhibitor
	-98.01	esmolol	Adrenergic receptor antagonist		-98	milrinone	Phosphodiesterase inhibitor		-98.73	itopride	Dopamine receptor antagonist
	-97.89	hydrocortisone	Glucocorticoid receptor agonist		-97.92	memantine	Glutamate receptor antagonist		-98.7	actarit	Interleukin receptor agonist
	-97.64	fluocinonide	Glucocorticoid receptor agonist		-97.8	guaifenesin	Expectorant		-98.31	paclitaxel	Tubulin inhibitor
	-97.48	betamethasone	Glucocorticoid receptor agonist		-97.71	repaglinide	Insulin secretagogue		-98.27	vinpocetine	Phosphodiesterase inhibitor
	-97.36	dilazep	Adenosine reuptake inhibitor		-97.67	palonosetron	Serotonin receptor antagonist		-98.24	cefpodoxime	Bacterial cell wall synthesis inhibitor
	-97.18	dexamethasone	Glucocorticoid receptor agonist		-97.64	dexamethasone	Glucocorticoid receptor agonist		-98.24	dasatinib	BCR-ABL kinase inhibitor
	-96.9	elvitegravir	HIV integrase inhibitor		-97.33	ramipril	ACE inhibitor		-98.01	phenazone	Cyclooxygenase inhibitor
	-96.83	estropipate	Estrogen receptor agonist		-97.31	temozolomide	DNA alkylating agent		-97.85	raltegravir	HIV integrase inhibitor
	-96.64	propafenone	Antiarrhythmic		-97.3	meclofenamic-acid	Cyclooxygenase inhibitor		-97.78	phensuximide	Succinimide antiepileptic
	-96.54	hydrocortisone	Glucocorticoid receptor agonist		-97.21	nilutamide	Androgen receptor antagonist		-97.47	fasudil	Rho associated kinase inhibitor
	-96.48	vemurafenib	RAF inhibitor		-97	hydrocortisone	Glucocorticoid receptor agonist		-97.46	cefazolin	Bacterial cell wall synthesis inhibitor
	-96.26	methylprednisolone	Glucocorticoid receptor agonist		-96.97	terazosin	Adrenergic receptor antagonist		-97.36	estropipate	Estrogen receptor agonist
	-96.09	tacrolimus	Calcineurin inhibitor		-96.94	deferiprone	Chelating agent		-97.32	entecavir	Reverse transcriptase inhibitor
	-95.89	albendazole	Anthelmintic		-96.83	fluticasone	Glucocorticoid receptor agonist		-97.31	mesna	Antioxidant
	-95.79	naphazoline	Adrenergic receptor agonist		-96.83	vemurafenib	RAF inhibitor		-97.16	mesoridazine	Dopamine receptor antagonist
	-95.77	metyrapone	Cytochrome P450 inhibitor		-96.79	estropipate	Estrogen receptor agonist		-97	nitrendipine	Calcium channel blocker
	-95.76	zuclopenthixol	Dopamine receptor antagonist		-96.3	lapatinib	EGFR inhibitor		-96.9	idarubicin	Topoisomerase inhibitor
	-95.54	rimexolone	Glucocorticoid receptor agonist		-96.16	dexamethasone	Glucocorticoid receptor agonist		-96.75	forskolin	Adenylyl cyclase activator
	-95.32	fluocinonide	Glucocorticoid receptor agonist		-96.12	acepromazine	Dopamine receptor antagonist		-96.7	acamprosate	Glutamate receptor antagonist
	-95.07	doxapram	Potassium channel blocker		-95.7	desoximetasone	Glucocorticoid receptor agonist		-96.47	cromoglicic-acid	Immunosuppressant
					-95.56	tocainide	Sodium channel blocker		-96.43	nabumetone	Cyclooxygenase inhibitor
					-95.35	beclometasone	Glucocorticoid receptor agonist		-96.05	benazepril	ACE inhibitor
									-95.98	betamethasone	Glucocorticoid receptor agonist
									-95.97	carprofen	Cyclooxygenase inhibitor
									-95.86	levetiracetam	Calcium channel blocker
									-95.82	daunorubicin	RNA synthesis inhibitor
									-95.75	naftopidil	Adrenergic receptor antagonist
									-95.56	bromocriptine	Dopamine receptor agonist
									-95.55	moxifloxacin	Bacterial DNA gyrase inhibitor
									-95.48	cefoxitin	Bacterial cell wall synthesis inhibitor
									-95.22	pirlindole	Monoamine oxidase inhibitor
